# Supplementary material
Source: publisher figshare collection journal article supplement (https://gsajournals.figshare.com/ndownloader/files/25296341)
Supplement: Supplementary file 1 [file 25296341]

## Sheet: D_vs_wt.DESeq2
Table S7. Gene expression levels in hrq1D and hrq1-K318A cells compared to wild-type.
hrq1D compared to wild-type
Feature	Standard Name	Molecule	Begin	End	Strand	baseMean	log2FoldChange	lfcSE	stat	pvalue	adj_pvalue	weighted_pvalue	D1	D2	D3	K1	K2	W2	W3	Deletion Mean	Mutation Mean	WildType Mean	Note	GO Terms
YJL153C	INO1	chrX	134332	135933	1	1067.12	-3.13663	0.258626	-12.1281	7.5013e-34	7.87188e-30	1.25749e-33	389.703	297.213	330.889	264.524	225.741	4036.89	1924.88	339.268	245.133	2980.89	Inositol-3-phosphate synthase; involved in synthesis of inositol phosphates and inositol-containing phospholipids; transcription is coregulated with other phospholipid biosynthetic genes by Ino2p and Ino4p, which bind the UASINO DNA element	GO:0004512,GO:0005737,GO:0006021
YDR291W	HRQ1	chrIV	1039728	1042961	0	541.756	-12.6706	1.19024	-10.6454	1.83132e-26	9.60893e-23	3.06995e-26	0	0	0	782.435	686.668	1122.22	1200.97	0	734.551	1161.59	3'-5' DNA helicase that has DNA strand annealing activity; helicase activity is stimulated by fork structure and 3'-tail length of substrates; acts with Rad4p in nucleotide-excision repair; belongs to the widely conserved RecQ family of proteins which are involved in maintaining genomic integrity; similar to the human RecQ4p implicated in Rothmund-Thomson syndrome (RTS)	GO:0000733,GO:0005634,GO:0006289,GO:0032508,GO:0043140
YGL255W	ZRT1	chrVII	20978	22108	0	4424.9	-1.54181	0.187247	-8.23411	1.80896e-16	2.94776e-13	1.41266e-16	3482.9	2729.83	3379.52	1408.94	1356.33	11191.2	7425.58	3197.42	1382.64	9308.39	High-affinity zinc transporter of the plasma membrane; responsible for the majority of zinc uptake; transcription is induced under low-zinc conditions by the Zap1p transcription factor	GO:0000006,GO:0005887,GO:0006830,GO:0016021
YBR072W	HSP26	chrII	382030	382674	0	8448.25	-0.984104	0.120288	-8.18126	2.80884e-16	4.39584e-13	2.80884e-16	6755.24	6195.43	6662.29	7000.15	6663.61	12457.7	13403.3	6537.65	6831.88	12930.5	Small heat shock protein (sHSP) with chaperone activity; forms hollow, sphere-shaped oligomers that suppress unfolded proteins aggregation; long-lived protein that is preferentially retained in mother cells and forms cytoplasmic foci; oligomer activation requires heat-induced conformational change; also has mRNA binding activity	GO:0003729,GO:0005634,GO:0005737,GO:0006457,GO:0010494,GO:0034605,GO:0051082
YPL095C	EEB1	chrXVI	368071	369441	1	2258.15	-0.938525	0.125056	-7.50485	6.14976e-14	2.11315e-10	1.68782e-13	1831.02	1918.96	1748.29	1613.13	1668.97	3587.29	3439.37	1832.76	1641.05	3513.33	Acyl-coenzymeA:ethanol O-acyltransferase; responsible for the major part of medium-chain fatty acid ethyl ester biosynthesis during fermentation; possesses short-chain esterase activity; may be involved in lipid metabolism and detoxification; EEB1 has a paralog, EHT1, that arose from the whole genome duplication	GO:0005575,GO:0034321,GO:0034338,GO:0051792,GO:0051793
YJL052W	TDH1	chrX	338271	339269	0	44315.6	-0.910195	0.127962	-7.11301	1.13539e-12	1.1846e-09	1.13539e-12	37914	34701.2	37258.9	31849.6	30831.1	63222.4	74431.8	36624.7	31340.4	68827.1	Glyceraldehyde-3-phosphate dehydrogenase (GAPDH), isozyme 1; involved in glycolysis and gluconeogenesis; tetramer that catalyzes the reaction of glyceraldehyde-3-phosphate to 1,3 bis-phosphoglycerate; detected in the cytoplasm and cell wall; protein abundance increases in response to DNA replication stress; GAPDH-derived antimicrobial peptides secreted by S. cerevisiae are active against a wide v…	GO:0004365,GO:0005737,GO:0005739,GO:0005811,GO:0005886,GO:0006094,GO:0006096,GO:0009277
YKL159C	RCN1	chrXI	153816	154451	1	1666.96	-1.28951	0.195172	-6.60705	3.92059e-11	3.50613e-08	3.92059e-11	1448.3	986.94	1493.84	723.961	617.718	2924.21	3473.74	1309.69	670.839	3198.98	Protein involved in calcineurin regulation during calcium signaling; has similarity to H. sapiens DSCR1 which is found in the Down Syndrome candidate region	GO:0005737,GO:0008597,GO:0019722,GO:0030346
YDL039C	PRM7	chrIV	381985	384081	1	524.619	-1.30701	0.206238	-6.33737	2.33728e-10	2.46362e-07	3.1484e-10	409.479	409.475	309.604	404.676	277.69	930.215	931.192	376.186	341.183	930.704	Pheromone-regulated protein; predicted to have one transmembrane segment; promoter contains Gcn4p binding elements	GO:0000747,GO:0003674,GO:0016021
YDR502C	SAM2	chrIV	1453310	1454464	1	6772.84	-0.947365	0.155043	-6.11034	9.94167e-10	3.40807e-07	5.98863e-10	6115.43	5232.72	4917.86	5571.72	4663.11	11279.5	9629.61	5422	5117.41	10454.5	S-adenosylmethionine synthetase; catalyzes transfer of the adenosyl group of ATP to the sulfur atom of methionine; comparative analysis suggests that a mitochondrially targeted form may result from translation starting at a non-canonical codon upstream of the annotated start codon	GO:0004478,GO:0005575,GO:0006555,GO:0006556
YML123C	PHO84	chrXIII	24037	25800	1	6123.63	-0.900676	0.14589	-6.17368	6.67178e-10	3.40807e-07	5.07224e-10	4935.85	5389.4	4716.62	4049.54	5050.36	9830.46	8893.2	5013.96	4549.95	9361.83	High-affinity inorganic phosphate (Pi) transporter; also low-affinity manganese transporter; regulated by Pho4p and Spt7p; mutation confers resistance to arsenate; exit from the ER during maturation requires Pho86p; cells overexpressing Pho84p accumulate heavy metals but do not develop symptoms of metal toxicity	GO:0005315,GO:0005384,GO:0005887,GO:0006797,GO:0006817,GO:0006828,GO:0016021,GO:0097079,GO:0097080
YMR008C	PLB1	chrXIII	280590	282584	1	8740.67	-1.23486	0.202989	-6.0834	1.17663e-09	3.40807e-07	5.56781e-10	7740.55	5179.42	8027.45	3923.31	3449.4	18914.4	13950.2	6982.47	3686.35	16432.3	Phospholipase B (lysophospholipase) involved in lipid metabolism; required for efficient acyl chain remodeling of newly synthesized phosphatidylethanolamine-derived phosphatidylcholine; required for deacylation of phosphatidylcholine and phosphatidylethanolamine but not phosphatidylinositol; PLB1 has a paralog, PLB3, that arose from the whole genome duplication	GO:0004622,GO:0005783,GO:0005886,GO:0006650,GO:0036151,GO:0042597
YNL093W	YPT53	chrXIV	449868	450530	0	255.328	-1.36013	0.225438	-6.0333	1.60646e-09	1.11002e-06	2.12783e-09	212.883	159.913	209.95	121.588	87.8406	537.855	457.263	194.249	104.714	497.559	Stress-induced Rab family GTPase; required for vacuolar protein sorting and endocytosis; involved in ionic stress tolerance; similar to Vps21p and Ypt52p; functional homolog of Vps21p; mammalian Rab5 homolog; YPT53 has a paralog, VPS21, that arose from the whole genome duplication	GO:0003924,GO:0005770,GO:0006623,GO:0006895,GO:0006897
YGL156W	AMS1	chrVII	210416	213667	0	952.373	-1.06124	0.178276	-5.9528	2.63597e-09	1.70982e-06	3.55075e-09	807.325	646.114	755.627	792.645	594.105	1630.26	1440.54	736.356	693.375	1535.4	Vacuolar alpha mannosidase; involved in free oligosaccharide (fOS) degradation; delivered to the vacuole in a novel pathway separate from the secretory pathway	GO:0000329,GO:0004559,GO:0009313,GO:0044262
YNL160W	YGP1	chrXIV	336545	337609	0	12435.5	-0.986342	0.174618	-5.64858	1.61781e-08	3.42309e-06	7.65548e-09	8367.57	7367.32	9105.26	14474.6	14925.3	19465.3	13342.9	8280.05	14700	16404.1	Cell wall-related secretory glycoprotein; induced by nutrient deprivation-associated growth arrest and upon entry into stationary phase; may be involved in adaptation prior to stationary phase entry; YGP1 has a paralog, SPS100, that arose from the whole genome duplication	GO:0003674,GO:0005576,GO:0070726
YER091C	MET6	chrV	339864	342167	1	13884.6	-0.766937	0.136183	-5.63165	1.78489e-08	5.66308e-06	1.35697e-08	13074.2	11266.6	11111.9	11484.1	10039.3	20667.5	19548.8	11817.6	10761.7	20108.1	Cobalamin-independent methionine synthase; involved in methionine biosynthesis and regeneration; requires a minimum of two glutamates on the methyltetrahydrofolate substrate, similar to bacterial metE homologs	GO:0003871,GO:0005737,GO:0005886,GO:0009086
YHR097C	YHR097C	chrVIII	297385	298609	1	3020.75	-1.08456	0.201465	-5.38339	7.30962e-08	2.17424e-05	5.55716e-08	2864.03	2018.3	2684.85	1736.58	1146.65	5098.29	5596.53	2522.39	1441.61	5347.41	Putative protein of unknown function; green fluorescent protein (GFP)-fusion protein localizes to the cytoplasm and the nucleus; YHR097C has a paralog, PAL1, that arose from the whole genome duplication	GO:0003674,GO:0005634,GO:0005737,GO:0008150
YGL006W	PMC1	chrVII	485921	489442	0	4709.23	-0.953659	0.180667	-5.27855	1.30211e-07	2.26891e-05	6.16156e-08	4121.55	3296.8	4705.98	2607.19	2579.49	8930.06	6723.54	4041.44	2593.34	7826.8	Vacuolar Ca2+ ATPase involved in depleting cytosol of Ca2+ ions; prevents growth inhibition by activation of calcineurin in the presence of elevated concentrations of calcium; similar to mammalian PMCA1a	GO:0000329,GO:0005388,GO:0006816,GO:0006874,GO:0016021,GO:0055085
YHR094C	HXT1	chrVIII	290913	292625	1	6034.36	-0.847157	0.157504	-5.37863	7.50535e-08	2.61019e-05	7.50535e-08	4991.69	4553.49	5020.42	4676.05	5530.18	9922.29	7546.4	4855.2	5103.11	8734.35	Low-affinity glucose transporter of the major facilitator superfamily; expression is induced by Hxk2p in the presence of glucose and repressed by Rgt1p when glucose is limiting; HXT1 has a paralog, HXT6, what arose from the whole genome duplication	GO:0005353,GO:0005354,GO:0005355,GO:0005886,GO:0015146,GO:0015578,GO:0015758,GO:0015761,GO:0016021
YLL052C	AQY2	chrXII	35912	36361	1	192.843	-1.22802	0.229281	-5.35597	8.50978e-08	3.23503e-05	9.81877e-08	118.656	170.413	152.867	103.025	111.454	368.508	324.98	147.312	107.239	346.744	Water channel that mediates water transport across cell membranes; only expressed in proliferating cells; controlled by osmotic signals; may be involved in freeze tolerance; disrupted by a stop codon in many S. cerevisiae strains	GO:0005789,GO:0005886,GO:0006833,GO:0015250,GO:0055085
YER185W	PUG1	chrV	559454	560365	0	355.568	-1.60075	0.301858	-5.303	1.13916e-07	3.39579e-05	1.13916e-07	281.517	150.222	335.727	88.1747	84.0625	957.644	591.63	255.822	86.1186	774.637	Plasma membrane protein involved in protoprophyrin and heme transport; roles in the uptake of protoprophyrin IX and the efflux of heme; expression is induced under both low-heme and low-oxygen conditions; member of the fungal lipid-translocating exporter (LTE) family of proteins	GO:0003674,GO:0005886,GO:0015886,GO:0016021
YNL208W	YNL208W	chrXIV	254418	255017	0	18424.6	-0.817578	0.155442	-5.25971	1.44284e-07	3.39579e-05	1.09693e-07	17813.5	14194.3	18163.1	9054.15	10801.6	28023.3	30922	16723.6	9927.86	29472.7	Protein of unknown function; may interact with ribosomes, based on co-purification experiments; authentic, non-tagged protein is detected in purified mitochondria in high-throughput studies; potential orthologs found in other fungi	GO:0003674,GO:0005739,GO:0005840,GO:0008150
YDR289C	RTT103	chrIV	1038280	1039509	1	1548.14	0.846345	0.155305	5.44956	5.04939e-08	3.41486e-05	1.20486e-07	1841.49	1844.66	2121.75	1310.56	1564.13	1154.42	999.938	1935.97	1437.34	1077.18	Protein involved in transcription termination by RNA polymerase II; interacts with exonuclease Rat1p and Rai1p; has an RPR domain (carboxy-terminal domain interacting domain); also involved in regulation of Ty1 transposition	GO:0000790,GO:0000993,GO:0010526,GO:0031124,GO:0035861,GO:0042769
YML128C	MSC1	chrXIII	15135	16676	1	3101.5	-0.954432	0.183835	-5.19179	2.08285e-07	3.41486e-05	1.25466e-07	2563.9	2088.57	2659.69	2378.86	2573.82	5606.33	3839.34	2437.38	2476.34	4722.84	Protein of unknown function; mutant is defective in directing meiotic recombination events to homologous chromatids; the authentic, non-tagged protein is detected in highly purified mitochondria and is phosphorylated	GO:0003674,GO:0005739,GO:0005783,GO:0005886,GO:0007131
YMR173W	DDR48	chrXIII	608689	609981	0	953.038	-1.12301	0.211546	-5.30859	1.1048e-07	3.88172e-05	1.4882e-07	853.857	743.032	542.774	814.92	611.106	1691.08	1414.5	713.221	713.013	1552.79	DNA damage-responsive protein; expression is increased in response to heat-shock stress or treatments that produce DNA lesions; contains multiple repeats of the amino acid sequence NNNDSYGS; protein abundance increases in response to DNA replication stress	GO:0003924,GO:0005737,GO:0006281,GO:0016887
YOR273C	TPO4	chrXV	834452	836431	1	2386.16	-0.867642	0.170742	-5.0816	3.74266e-07	5.64525e-05	2.25449e-07	2036.93	1813.97	2258.17	1692.03	1470.62	4250.37	3181.05	2036.36	1581.32	3715.71	Polyamine transporter of the major facilitator superfamily; member of the 12-spanner drug:H(+) antiporter DHA1 family; recognizes spermine, putrescine, and spermidine; localizes to the plasma membrane	GO:0000296,GO:0000297,GO:0000329,GO:0005886,GO:0015606,GO:0015848,GO:0016021
YDL037C	BSC1	chrIV	384601	385587	1	64.8801	-2.62285	0.505949	-5.18402	2.17153e-07	6.03262e-05	2.50556e-07	31.4089	33.1134	7.7401	60.3301	24.5576	165.769	131.242	24.0875	42.4438	148.505	Protein of unconfirmed function; similar to cell surface flocculin Flo11p; ORF exhibits genomic organization compatible with a translational readthrough-dependent mode of expression	GO:0003674,GO:0005575,GO:0008150
YBR067C	TIP1	chrII	372103	372735	1	5099.23	0.827117	0.172267	4.80137	1.57587e-06	0.000172892	7.457e-07	4690.4	5201.22	5157.81	7611.8	7379.56	2270.68	3383.12	5016.48	7495.68	2826.9	Major cell wall mannoprotein with possible lipase activity; transcription is induced by heat- and cold-shock; member of the Srp1p/Tip1p family of serine-alanine-rich proteins	GO:0005199,GO:0009277,GO:0016298,GO:0031505
YGR268C	HUA1	chrVII	1026057	1026653	1	1370.13	-0.735235	0.144064	-5.10353	3.33374e-07	0.000199525	9.14955e-07	1362.22	1129.89	1310.01	813.064	759.396	2064.36	2151.95	1267.37	786.23	2108.16	Cytoplasmic protein containing a zinc finger domain; sequence similarity to that of Type I J-proteins; computational analysis of large-scale protein-protein interaction data suggests a possible role in actin patch assembly	GO:0003674,GO:0005737,GO:0008150
YNR075W	COS10	chrXIV	779916	781040	0	467.436	-1.38465	0.280572	-4.9351	8.01092e-07	0.000199525	9.24318e-07	374.58	281.867	339.597	332.28	210.629	1150.84	582.255	332.015	271.454	866.549	Protein of unknown function; member of the DUP380 subfamily of conserved, often subtelomerically-encoded proteins; may have a role in intracellular sterol transport	GO:0003674,GO:0005635,GO:0005737,GO:0005783,GO:0006897,GO:0016021
YER184C	YER184C	chrV	556296	558680	1	921.431	-0.864738	0.180632	-4.7873	1.69041e-06	0.000275188	1.31879e-06	951.574	654.191	872.696	504.916	461.872	1487.15	1517.61	826.153	483.394	1502.38	Transcriptional activator of oleate genes; regulates genes involved in fatty acid utilization; zinc cluster protein; deletion confers sensitivity to Calcufluor white, and prevents growth on glycerol or lactate as sole carbon source	GO:0003700,GO:0005634,GO:0043565,GO:0045944
YDR133C	YDR133C	chrIV	720962	721297	1	10209.6	0.679317	0.140951	4.81951	1.43912e-06	0.00029061	1.43912e-06	10455.7	11513.8	9761.23	13812.8	12714.2	6027.32	7181.84	10576.9	13263.5	6604.58	Dubious open reading frame; unlikely to encode a functional protein, based on available experimental and comparative sequence data; partially overlaps YDR134C	GO:0003674,GO:0005575,GO:0008150
YFL014W	HSP12	chrVI	107256	107585	0	3906.63	-0.578044	0.121809	-4.7455	2.07987e-06	0.000317739	1.62423e-06	3342.14	3124.77	3402.74	3757.17	3898.99	4758.41	5062.18	3289.88	3828.08	4910.3	Plasma membrane protein involved in maintaining membrane organization; involved in maintaining organization during stress conditions; induced by heat shock, oxidative stress, osmostress, stationary phase, glucose depletion, oleate and alcohol; protein abundance increased in response to DNA replication stress and dietary restriction; regulated by the HOG and Ras-Pka pathways; required for dietary …	GO:0005634,GO:0005737,GO:0005768,GO:0005829,GO:0005886,GO:0007009,GO:0007155,GO:0008289,GO:0034599,GO:0034605,GO:0071470
YJR073C	OPI3	chrX	572315	572935	1	10856.3	-1.11928	0.240723	-4.64967	3.32461e-06	0.0003799	2.00267e-06	7809.18	7235.67	10085.3	5951.33	8516.76	23459.3	12936.7	8376.74	7234.05	18198	Methylene-fatty-acyl-phospholipid synthase; catalyzes the last two steps in phosphatidylcholine biosynthesis; also known as phospholipid methyltransferase	GO:0000773,GO:0005739,GO:0006656,GO:0016021,GO:0080101
YJL116C	NCA3	chrX	193860	194873	1	646.75	-0.726609	0.155134	-4.68375	2.81672e-06	0.000404598	2.1975e-06	550.238	483.778	527.294	634.858	611.106	808.572	911.402	520.437	622.982	859.987	Protein involved in mitochondrion organization; functions with Nca2p to regulate mitochondrial expression of subunits 6 (Atp6p) and 8 (Atp8p) of the Fo-F1 ATP synthase; member of the SUN family; expression induced in cells treated with the mycotoxin patulin; NCA3 has a paralog, UTH1, that arose from the whole genome duplication	GO:0003674,GO:0005575,GO:0007005
YBR092C	PHO3	chrII	427698	429101	1	21091.4	0.598391	0.130191	4.59625	4.30157e-06	0.000584913	3.27028e-06	20586.8	23083.2	22982.3	23843.4	27794.5	14690.2	14659.5	22217.4	25818.9	14674.9	Constitutively expressed acid phosphatase similar to Pho5p; brought to the cell surface by transport vesicles; hydrolyzes thiamin phosphates in the periplasmic space, increasing cellular thiamin uptake; expression is repressed by thiamin	GO:0003993,GO:0006796,GO:0030287,GO:0042723
YGR032W	GSC2	chrVII	548264	553951	0	15560.4	-1.10281	0.240697	-4.58175	4.61107e-06	0.000609582	3.50558e-06	16177.9	9956.62	15300.2	5194.88	2968.64	32249.8	27074.4	13811.6	4081.76	29662.1	Catalytic subunit of 1,3-beta-glucan synthase; involved in formation of the inner layer of the spore wall; activity positively regulated by Rho1p and negatively by Smk1p; GSC2 has a paralog, FKS1, that arose from the whole genome duplication	GO:0000148,GO:0003843,GO:0005628,GO:0006075,GO:0016021,GO:0030476,GO:0030478
YDR222W	YDR222W	chrIV	910054	911301	0	1307.74	0.624417	0.135295	4.61521	3.92691e-06	0.000664391	3.92691e-06	1219.13	1331	1306.14	1763.49	1866.38	818.112	849.947	1285.42	1814.94	834.03	Protein of unknown function; green fluorescent protein (GFP)-fusion protein localizes to the cytoplasm in a punctate pattern; YDR222W has a paralog, YLR225C, that arose from the whole genome duplication	GO:0003674,GO:0005737,GO:0008150
YLR194C	YLR194C	chrXII	540809	541573	1	7964.75	-0.815791	0.179465	-4.54569	5.47554e-06	0.000685765	4.16279e-06	7581.18	5710.04	8286.74	4946.14	3910.32	12140.5	13178.3	7192.65	4428.23	12659.4	Structural constituent of the cell wall; attached to the plasma membrane by a GPI-anchor; expression is upregulated in response to cell wall stress	GO:0005199,GO:0009277,GO:0031505,GO:0046658
YLR121C	YPS3	chrXII	388744	390270	1	3977.99	-0.838667	0.1846	-4.54316	5.5418e-06	0.000694656	4.32773e-06	3570.15	2853.4	4232.87	2213.65	2271.58	7181.74	5522.57	3552.14	2242.61	6352.15	Aspartic protease; member of the yapsin family of proteases involved in cell wall growth and maintenance; attached to the plasma membrane via a glycosylphosphatidylinositol (GPI) anchor	GO:0004190,GO:0031505,GO:0046658
YJR106W	ECM27	chrX	624838	627015	0	726.072	-1.09443	0.24008	-4.55858	5.15001e-06	0.000755623	4.82826e-06	580.483	497.508	658.876	427.88	444.87	1613.57	859.321	578.956	436.375	1236.44	Putative protein of unknown function; may play a role in cell wall biosynthesis, mutants are hypersensitive to Papulacandin B; null mutants have increased plasmid loss; displays a two-hybrid interaction with Pdr5p	GO:0003674,GO:0008150,GO:0016021
YNL044W	YIP3	chrXIV	545268	545877	0	2279.85	-0.696924	0.15526	-4.48877	7.16371e-06	0.000831547	5.44623e-06	2375.44	1787.31	2209.8	1357.89	1345	3592.06	3291.46	2124.19	1351.45	3441.76	Protein localized to COPII vesicles; proposed to be involved in ER to Golgi transport; interacts with members of the Rab GTPase family and Yip1p; also interacts with Rtn1p	GO:0003674,GO:0005783,GO:0005794,GO:0006888,GO:0030134
YKL001C	MET14	chrXI	438777	439385	1	2905.5	-0.812127	0.179132	-4.53368	5.79661e-06	0.000863972	5.79661e-06	2881.48	2162.06	3110.55	1394.09	1247.71	5236.63	4305.98	2718.03	1320.9	4771.31	Adenylylsulfate kinase; required for sulfate assimilation and involved in methionine metabolism	GO:0000096,GO:0004020,GO:0005737,GO:0019379
YGL121C	GPG1	chrVII	280777	281157	1	505.396	-0.942792	0.212065	-4.44576	8.75827e-06	0.000994737	6.83286e-06	337.355	354.555	423.77	423.239	567.658	831.231	599.963	371.894	495.448	715.597	Proposed gamma subunit of the heterotrimeric G protein; interacts with the receptor Gpr1p; involved in regulation of pseudohyphal growth; requires Gpb1p or Gpb2p to interact with Gpa2p; overproduction causes prion curing	GO:0001403,GO:0004871,GO:0005575,GO:0007165
YMR251W	GTO3	chrXIII	772915	774015	0	230.874	-1.21068	0.271718	-4.45566	8.36364e-06	0.00101756	7.15215e-06	223.352	160.721	194.47	98.3845	48.1707	488.959	402.058	192.848	73.2776	445.509	Omega class glutathione transferase; putative cytosolic localization	GO:0004364,GO:0005737,GO:0006749
YBR085C-A	YBR085C-A	chrII	418907	419164	1	3776.43	-0.829536	0.18798	-4.41289	1.01998e-05	0.00105527	7.7544e-06	3448	2649.07	3752.01	2335.24	2583.27	6758.37	4909.07	3283.03	2459.25	5833.72	Protein of unknown function; green fluorescent protein (GFP)-fusion protein localizes to the cytoplasm and to the nucleus; protein abundance increases in response to DNA replication stress	GO:0003674,GO:0005634,GO:0005737,GO:0008150
YDR497C	ITR1	chrIV	1443713	1445467	1	22603.1	-0.940551	0.212701	-4.42193	9.78217e-06	0.00105527	7.63914e-06	19050.1	15799.1	20951.5	14811.5	16211.8	45448.2	25949.4	18600.2	15511.6	35698.8	Myo-inositol transporter; member of the sugar transporter superfamily; expression is repressed by inositol and choline via Opi1p and derepressed via Ino2p and Ino4p; relative distribution to the vacuole increases upon DNA replication stress; ITR1 has a paralog, ITR2, that arose from the whole genome duplication	GO:0000329,GO:0005365,GO:0005886,GO:0007124,GO:0015798,GO:0016020,GO:0016021,GO:0055085
YGL089C	MF(ALPHA)2	chrVII	344791	345153	1	11528	0.723519	0.165557	4.3702	1.24131e-05	0.00129112	9.69371e-06	11316.5	12934.4	13089.5	11955.6	16324.2	6925.33	8150.53	12446.8	14139.9	7537.93	Mating pheromone alpha-factor, made by alpha cells; interacts with mating type a cells to induce cell cycle arrest and other responses leading to mating; also encoded by MF(ALPHA)1, which is more highly expressed; MF(ALPHA)2 has a paralog, MF(ALPHA)1, that arose from the whole genome duplication	GO:0000750,GO:0000772,GO:0005576
YKL096W	CWP1	chrXI	261132	261851	0	2519.03	0.935853	0.216108	4.33049	1.48781e-05	0.00147516	1.13111e-05	2216.07	2841.29	2169.16	3823.07	4066.17	920.674	1596.78	2408.84	3944.62	1258.72	Cell wall mannoprotein that localizes to birth scars of daughter cells; linked to a beta-1,3- and beta-1,6-glucan heteropolymer through a phosphodiester bond; required for propionic acid resistance	GO:0005199,GO:0005628,GO:0009277,GO:0031505,GO:0032120,GO:0071597
YGL184C	STR3	chrVII	154615	156012	1	475.368	-0.762026	0.176361	-4.32082	1.5545e-05	0.00154936	1.21276e-05	433.908	357.786	433.445	391.682	327.749	680.965	702.04	408.38	359.715	691.502	Peroxisomal cystathionine beta-lyase; converts cystathionine into homocysteine; may be redox regulated by Gto1p; involved in the release of the aromatic thiol 3-mercaptohexanol during wine fermentation	GO:0004121,GO:0005634,GO:0005737,GO:0005777,GO:0009086,GO:0019346
YLR178C	TFS1	chrXII	513162	513821	1	2861.38	-0.626456	0.149063	-4.20263	2.63832e-05	0.00156306	1.24845e-05	2613.92	2258.17	2671.3	2384.43	2341.47	3475.19	4285.15	2514.46	2362.95	3880.17	Inhibitor of carboxypeptidase Y (Prc1p), and Ras GAP (Ira2p); phosphatidylethanolamine-binding protein (PEBP) family member and ortholog of hPEBP1/RKIP, a natural metastasis suppressor; targets to vacuolar membranes during stationary phase; acetylated by NatB N-terminal acetyltransferase; protein abundance increases in response to DNA replication stress	GO:0000328,GO:0000329,GO:0005543,GO:0005737,GO:0008289,GO:0030162,GO:0030414,GO:0046578
YHR216W	IMD2	chrVIII	554396	555967	0	3859.66	0.566521	0.134192	4.22171	2.42457e-05	0.0017927	1.46051e-05	4912.59	4748.13	4292.85	3515.85	3268.05	2948.07	3332.08	4651.19	3391.95	3140.08	Inosine monophosphate dehydrogenase; catalyzes the rate-limiting step in GTP biosynthesis, expression is induced by mycophenolic acid resulting in resistance to the drug, expression is repressed by nutrient limitation; IMD2 has a paralog, YAR073W/YAR075W, that arose from a segmental duplication	GO:0000785,GO:0003682,GO:0003729,GO:0003938,GO:0005737,GO:0006183
YBR208C	DUR1,2	chrII	636703	642210	1	1124.48	-0.603224	0.140003	-4.30866	1.64249e-05	0.00197731	1.64249e-05	1045.8	958.672	1062.33	854.831	844.403	1639.8	1465.53	1022.27	849.617	1552.67	Urea amidolyase; contains both urea carboxylase and allophanate hydrolase activities, degrades urea to CO2 and NH3; expression sensitive to nitrogen catabolite repression and induced by allophanate, an intermediate in allantoin degradation; protein abundance increases in response to DNA replication stress	GO:0000256,GO:0004039,GO:0004847,GO:0005737,GO:0043419
YDR290W	YDR290W	chrIV	1039370	1039699	0	10.8671	6.91564	1.61456	4.28329	1.84152e-05	0.00208361	1.83065e-05	26.7557	29.0752	18.3827	1.85631	0	0	0	24.7379	0.928155	0	Dubious open reading frame; unlikely to encode a functional protein, based on available experimental and comparative sequence data; partially overlaps the verified ORF RTT103	GO:0003674,GO:0005575,GO:0008150
YER103W	SSA4	chrV	364589	366517	0	2633.56	-0.603004	0.146395	-4.11901	3.80499e-05	0.00208361	1.80052e-05	2225.38	2255.75	2111.11	2779.82	2388.7	3007.7	3666.44	2197.41	2584.26	3337.07	Heat shock protein that is highly induced upon stress; plays a role in SRP-dependent cotranslational protein-membrane targeting and translocation; member of the HSP70 family; cytoplasmic protein that concentrates in nuclei upon starvation; SSA4 has a paralog, SSA3, that arose from the whole genome duplication	GO:0005634,GO:0005737,GO:0006457,GO:0006616,GO:0016887,GO:0034605,GO:0051082
YLR004C	THI73	chrXII	157934	159505	1	1679.06	0.765249	0.175891	4.35071	1.35699e-05	0.00208361	1.82792e-05	1744.94	1974.69	1644.77	1873.02	2410.42	1180.66	924.942	1788.13	2141.72	1052.8	Putative plasma membrane permease; proposed to be involved in carboxylic acid uptake and repressed by thiamine; substrate of Dbf2p/Mob1p kinase; transcription is altered if mitochondrial dysfunction occurs	GO:0005215,GO:0005783,GO:0006810,GO:0016021
YDL234C	GYP7	chrIV	34237	36477	1	2284.39	-0.762641	0.182364	-4.18196	2.89002e-05	0.00245609	2.19715e-05	2202.11	1665.36	2439.1	1421.93	1131.54	3586.1	3544.57	2102.19	1276.74	3565.33	GTPase-activating protein for yeast Rab family members; members include Ypt7p (most effective), Ypt1p, Ypt31p, and Ypt32p (in vitro); involved in vesicle mediated protein trafficking	GO:0005097,GO:0005737,GO:0016192,GO:0032889
YJR010W	MET3	chrX	456239	457774	0	1141.22	-0.68566	0.156388	-4.38436	1.16328e-05	0.00246065	2.24053e-05	1122.58	960.288	1040.08	846.478	672.5	1669.62	1676.98	1040.98	759.489	1673.3	ATP sulfurylase; catalyzes the primary step of intracellular sulfate activation, essential for assimilatory reduction of sulfate to sulfide, involved in methionine metabolism	GO:0000096,GO:0004781,GO:0005737,GO:0005739,GO:0019379
YLR054C	OSW2	chrXII	248717	250978	1	281.585	-1.16736	0.273978	-4.2608	2.03701e-05	0.00253675	2.35034e-05	217.536	155.067	281.546	197.697	140.734	571.247	407.266	218.05	169.215	489.257	Protein of unknown function reputedly involved in spore wall assembly	GO:0003674,GO:0005628,GO:0005737,GO:0016021,GO:0030476
YHR096C	HXT5	chrVIII	294669	296447	1	387.822	-0.870956	0.20751	-4.19717	2.7027e-05	0.00285069	2.68675e-05	300.13	287.521	364.752	290.513	309.803	679.773	482.262	317.468	300.158	581.017	Hexose transporter with moderate affinity for glucose; induced in the presence of non-fermentable carbon sources, induced by a decrease in growth rate, contains an extended N-terminal domain relative to other HXTs; HXT5 has a paralog, HXT3, that arose from the whole genome duplication	GO:0005353,GO:0005355,GO:0005886,GO:0008645,GO:0015578,GO:0015758,GO:0016021
YGR213C	RTA1	chrVII	918512	919465	1	337.615	-0.829504	0.195929	-4.2337	2.29873e-05	0.00317671	3.04477e-05	262.904	271.368	307.669	250.602	272.023	566.477	432.265	280.647	261.312	499.371	Protein involved in 7-aminocholesterol resistance; has seven potential membrane-spanning regions; expression is induced under both low-heme and low-oxygen conditions; member of the fungal lipid-translocating exporter (LTE) family of protein; RTA1 has a paralog, YLR046C, that arose from the whole genome duplication	GO:0003674,GO:0005886,GO:0008150,GO:0016021
YNL134C	YNL134C	chrXIV	372451	373581	1	4678.99	-0.613215	0.147626	-4.15383	3.26958e-05	0.00335534	3.26958e-05	4464.72	3976.03	4114.83	3853.7	3542.9	5631.38	7169.35	4185.19	3698.3	6400.36	Protein of unknown function; similar to dehydrogenases from other model organisms; green fluorescent protein (GFP)-fusion protein localizes to both the cytoplasm and nucleus; protein abundance increases in response to DNA replication stress	GO:0005634,GO:0005737,GO:0008106,GO:0008150
YDL222C	FMP45	chrIV	60872	61801	1	177.774	-0.945799	0.228613	-4.13712	3.51689e-05	0.00351184	3.49615e-05	141.922	135.684	181.892	93.7437	101.064	308.879	281.232	153.166	97.4038	295.056	Integral membrane protein localized to mitochondria; required for sporulation and maintaining sphingolipid content; similar to SUR7; FMP45 has a paralog, YNL194C, that arose from the whole genome duplication	GO:0003674,GO:0005739,GO:0005886,GO:0005938,GO:0016021,GO:0030437,GO:0031505
YEL073C	YEL073C	chrV	7230	7553	1	317.553	-1.02526	0.250068	-4.09992	4.13294e-05	0.00351184	3.53428e-05	279.19	227.755	259.293	235.751	181.348	658.306	381.226	255.413	208.55	519.766	Putative protein of unknown function; located adjacent to ARS503 and the telomere on the left arm of chromosome V; regulated by inositol/choline	GO:0003674,GO:0005575,GO:0008150
YBR296C	PHO89	chrII	796798	798522	1	102.689	-1.28176	0.309295	-4.14414	3.41091e-05	0.00384949	3.93558e-05	103.533	61.3809	71.5959	50.1204	51.0042	221.821	159.365	78.8366	50.5623	190.593	Plasma membrane Na+/Pi cotransporter; active in early growth phase; similar to phosphate transporters of Neurospora crassa; transcription regulated by inorganic phosphate concentrations and Pho4p; mutations in related human transporter genes hPit1 and hPit2 are associated with hyperphosphatemia-induced calcification of vascular tissue and familial idiopathic basal ganglia calcification	GO:0005886,GO:0006817,GO:0015319,GO:0016021,GO:0035435,GO:0055085
YOL052C-A	DDR2	chrXV	231570	231755	1	378.096	-0.729403	0.181309	-4.02298	5.74661e-05	0.00473275	4.9142e-05	279.19	297.213	343.467	379.615	329.638	517.581	499.969	306.623	354.627	508.775	Multi-stress response protein; expression is activated by a variety of xenobiotic agents and environmental or physiological stresses; DDR2 has a paralog, HOR7, that arose from the whole genome duplication	GO:0000324,GO:0003674,GO:0005737,GO:0006974,GO:0009267,GO:0034605,GO:0070301
YNL237W	YTP1	chrXIV	205188	206567	0	517.988	-0.676932	0.168775	-4.01086	6.04975e-05	0.00537961	5.67179e-05	445.541	445.011	414.095	462.221	467.539	772.794	618.711	434.883	464.88	695.753	Probable type-III integral membrane protein of unknown function; has regions of similarity to mitochondrial electron transport proteins	GO:0003674,GO:0008150,GO:0016020,GO:0016021
YJL172W	CPS1	chrX	97737	99467	0	5329.46	-1.00248	0.253306	-3.95757	7.57151e-05	0.00552448	5.91278e-05	4141.32	3572.21	5682.2	2583.98	3434.28	11663.5	6228.78	4465.24	3009.13	8946.12	Vacuolar carboxypeptidase S; expression is induced under low-nitrogen conditions	GO:0000328,GO:0004180,GO:0006807,GO:0051603
YDL204W	RTN2	chrIV	94605	95786	0	543.708	-0.738978	0.184647	-4.00212	6.2777e-05	0.00577917	6.2777e-05	426.928	425.628	491.496	489.138	476.039	863.43	633.294	448.018	482.589	748.362	Reticulon protein; stabilizes membrane curvature; involved in nuclear pore assembly and maintenance of tubular ER morphology; interacts with exocyst subunit Sec6p, Yip3p, and Sbh1p; much less abundant than Rtn1p; rtn1 rtn2 yop1 triple mutant lacks tubular ER; member of RTNLA (reticulon-like A) subfamily; protein increases in abundance and relocalizes to plasma membrane upon DNA replication stress…	GO:0003674,GO:0005634,GO:0005737,GO:0005783,GO:0032541,GO:0071782,GO:0071786,GO:0071788
YLL028W	TPO1	chrXII	84804	86564	0	1353.95	-0.716539	0.171564	-4.17651	2.96009e-05	0.00640807	7.06321e-05	1137.7	1177.54	1164.88	1056.24	1126.82	2246.83	1567.61	1160.04	1091.53	1907.22	Polyamine transporter of the major facilitator superfamily; member of the 12-spanner drug:H(+) antiporter DHA1 family; recognizes spermine, putrescine, and spermidine; catalyzes uptake of polyamines at alkaline pH and excretion at acidic pH; during oxidative stress exports spermine, spermidine from the cell, which controls timing of expression of stress-responsive genes; phosphorylation enhances …	GO:0000296,GO:0000297,GO:0000329,GO:0005886,GO:0015606,GO:0015847,GO:0015848,GO:0016021,GO:0033101,GO:1902047
YKL183W	LOT5	chrXI	98721	99641	0	1153.68	0.734815	0.185091	3.97001	7.18696e-05	0.0064272	7.18696e-05	1148.17	1324.53	1470.62	1119.36	1433.79	692.891	886.403	1314.44	1276.57	789.647	Protein of unknown function; gene expression increases in cultures shifted to a lower temperature; protein abundance increases in response to DNA replication stress	GO:0003674,GO:0005634,GO:0005737,GO:0008150
YAL061W	BDH2	chrI	33448	34701	0	693.419	-0.686729	0.168115	-4.08487	4.41014e-05	0.00651832	7.39298e-05	574.667	575.85	581.475	646.924	617.718	799.031	1058.27	577.33	632.321	928.649	Putative medium-chain alcohol dehydrogenase with similarity to BDH1; transcription induced by constitutively active PDR1 and PDR3	GO:0005634,GO:0005737,GO:0008150,GO:0016616
YOR384W	FRE5	chrXV	1061564	1063648	0	456.408	-0.794348	0.1999	-3.97373	7.07551e-05	0.00709804	8.16388e-05	385.05	356.171	328.954	511.414	375.92	690.506	546.841	356.725	443.667	618.673	Putative ferric reductase with similarity to Fre2p; expression induced by low iron levels; the authentic, non-tagged protein is detected in highly purified mitochondria in high-throughput studies	GO:0000293,GO:0005739,GO:0008150,GO:0016021
YHR140W	YHR140W	chrVIII	380572	381291	0	344.914	-1.15631	0.291297	-3.96953	7.20149e-05	0.00712545	8.30923e-05	219.862	213.218	335.727	232.967	269.189	763.253	380.185	256.269	251.078	571.719	Putative integral membrane protein of unknown function	GO:0003674,GO:0005737,GO:0005783,GO:0008150,GO:0016021
YLR120C	YPS1	chrXII	386511	388220	1	6766.69	-0.789353	0.201724	-3.91304	9.11404e-05	0.00770999	9.11404e-05	7100.74	4954.08	6765.81	4094.09	2769.34	11721.9	9960.84	6273.54	3431.72	10841.4	Aspartic protease; member of the yapsin family of proteases involved in cell wall growth and maintenance; attached to the plasma membrane via a glycosylphosphatidylinositol (GPI) anchor; YPS1 has a paralog, MKC7, that arose from the whole genome duplication	GO:0004190,GO:0009277,GO:0016485,GO:0031505
YGR212W	SLI1	chrVII	917040	918446	0	306.505	-0.794627	0.205701	-3.86303	0.000111989	0.00799338	9.57674e-05	274.537	253.6	231.235	280.303	227.63	494.922	383.309	253.124	253.966	439.116	N-acetyltransferase; confers resistance to the sphingolipid biosynthesis inhibitor myriocin (ISP-1) by converting it into N-acetyl-myriocin, co-operates with Ypk1p in mediating resistance to myriocin	GO:0005635,GO:0005886,GO:0008080,GO:0042493
YPL197C	YPL197C	chrXVI	174343	174756	1	456.411	0.672289	0.172532	3.8966	9.75528e-05	0.00803527	9.75528e-05	551.401	554.043	522.457	431.592	455.26	304.109	376.018	542.634	443.426	340.064	Dubious open reading frame; unlikely to encode a functional protein, based on available experimental and comparative sequence data; partially overlaps the ribosomal gene RPB7B	GO:0003674,GO:0005575,GO:0008150
YOR219C	STE13	chrXV	752214	755009	1	2765.01	-0.765811	0.207663	-3.68776	0.000226233	0.00870332	0.000107054	2854.72	2104.72	2552.3	1873.02	1456.45	5165.08	3348.75	2503.91	1664.74	4256.91	Dipeptidyl aminopeptidase; Golgi integral membrane protein that cleaves on the carboxyl side of repeating -X-Ala- sequences, required for maturation of alpha factor, transcription is induced by a-factor	GO:0004177,GO:0005802,GO:0007323
YMR195W	ICY1	chrXIII	654034	654417	0	1113.29	0.729813	0.179322	4.06985	4.70436e-05	0.00900901	0.000112253	801.509	994.209	983.96	1917.57	1978.78	472.263	644.752	926.559	1948.17	558.507	Protein of unknown function; required for viability in rich media of cells lacking mitochondrial DNA; mutants have an invasive growth defect with elongated morphology; induced by amino acid starvation; ICY1 has a paralog, ICY2, that arose from the whole genome duplication	GO:0000329,GO:0003674,GO:0008150
YMR058W	FET3	chrXIII	388822	390732	0	4520.95	0.563695	0.151125	3.73	0.000191479	0.00902554	0.000115342	4128.53	5087.34	5079.44	4984.19	5918.38	3136.49	3312.29	4765.1	5451.29	3224.39	Ferro-O2-oxidoreductase; multicopper oxidase that oxidizes ferrous (Fe2+) to ferric iron (Fe3+) for subsequent cellular uptake by transmembrane permease Ftr1p; required for high-affinity iron uptake and involved in mediating resistance to copper ion toxicity, belongs to class of integral membrane multicopper oxidases; protein abundance increases in response to DNA replication stress	GO:0004322,GO:0005381,GO:0005886,GO:0006827,GO:0016021,GO:0033215,GO:0033573,GO:0046688,GO:1901684
YOR237W	HES1	chrXV	781994	783298	0	99.7257	-1.23434	0.320081	-3.85633	0.000115103	0.00902554	0.000115103	74.4507	50.8815	95.7837	64.9709	66.1166	197.969	147.907	73.7053	65.5437	172.938	Protein implicated in the regulation of ergosterol biosynthesis; one of a seven member gene family with a common essential function and non-essential unique functions; similar to human oxysterol binding protein (OSBP); HES1 has a paralog, KES1, that arose from the whole genome duplication	GO:0005575,GO:0006887,GO:0006897,GO:0008142,GO:0008289,GO:0015248,GO:0015918,GO:0030011
YMR120C	ADE17	chrXIII	507502	509280	1	4142.27	-0.542085	0.143346	-3.78164	0.000155799	0.00915403	0.000118447	4532.19	3871.03	3752.98	2709.29	2332.97	5753.02	6044.42	4052.07	2521.13	5898.72	Enzyme of 'de novo' purine biosynthesis; contains both 5-aminoimidazole-4-carboxamide ribonucleotide transformylase and inosine monophosphate cyclohydrolase activities; ADE17 has a paralog, ADE16, that arose from the whole genome duplication; ade16 ade17 mutants require adenine and histidine	GO:0003937,GO:0004643,GO:0005829,GO:0005886,GO:0006164,GO:0006189
YNL015W	PBI2	chrXIV	605384	605611	0	3466.85	-0.534421	0.144922	-3.68766	0.000226328	0.010408	0.000136335	2851.23	2699.95	2899.63	4236.1	3421.06	4336.23	3823.72	2816.94	3828.58	4079.98	Cytosolic inhibitor of vacuolar proteinase B (PRB1); required for efficient vacuole inheritance; with thioredoxin forms protein complex LMA1, which assists in priming SNARE molecules and promotes vacuole fusion; protein abundance increases in response to DNA replication stress	GO:0000324,GO:0004866,GO:0005634,GO:0005737,GO:0030162,GO:0042144
YDR070C	FMP16	chrIV	588098	588379	1	324.679	-0.762089	0.199064	-3.82837	0.000128994	0.0111976	0.000148836	212.883	256.831	298.961	323.926	309.803	416.212	454.138	256.225	316.865	435.175	Protein of unknown function; may be involved in responding to conditions of stress; the authentic, non-tagged protein is detected in highly purified mitochondria in high-throughput studies; protein abundance increases in response to DNA replication stress	GO:0003674,GO:0005739,GO:0008150
YIR014W	YIR014W	chrIX	381086	381814	0	127.335	-1.04731	0.279164	-3.7516	0.000175706	0.0111976	0.000150255	98.8799	98.5325	87.0761	119.732	94.4523	238.517	154.157	94.8295	107.092	196.337	Putative protein of unknown function; green fluorescent protein (GFP)-fusion protein localizes to the vacuole; expression directly regulated by the metabolic and meiotic transcriptional regulator Ume6p; YIR014W is a non-essential gene	GO:0000324,GO:0003674,GO:0008150
YDL183C	YDL183C	chrIV	130871	131833	1	465.14	0.701869	0.184706	3.79992	0.000144744	0.0121567	0.000167009	517.665	576.657	430.543	543.899	561.991	306.494	318.73	508.288	552.945	312.612	Protein that may form an active mitochondrial KHE system; mitochondrial inner-membrane protein; non-essential gene; KHE system stands for K+/H+ exchanger system	GO:0003674,GO:0006813,GO:0015992,GO:0031305
YIL136W	OM45	chrIX	93619	94800	0	2225.46	-0.461524	0.120198	-3.8397	0.000123184	0.0121567	0.000165933	1933.39	1927.84	1995.98	2182.09	2162.01	2691.66	2685.25	1952.4	2172.05	2688.46	Mitochondrial outer membrane protein of unknown function; major constituent of the outer membrane, located on the outer (cytosolic) face; interacts with porin (Por1p) and with Om14p; imported via the presequence pathway involving the TOM and TIM23 complexes, then assembled in the outer membrane by Mim1p; protein abundance increases in response to DNA replication stress	GO:0003674,GO:0005739,GO:0005741,GO:0008150,GO:0031307
YLL026W	HSP104	chrXII	88623	91349	0	11057	-0.465227	0.126518	-3.67717	0.000235832	0.0129008	0.000179292	10919.8	9413.89	10662	9036.52	8842.62	13770.8	14753.2	10331.9	8939.57	14262	Disaggregase; heat shock protein that cooperates with Ydj1p (Hsp40) and Ssa1p (Hsp70) to refold and reactivate previously denatured, aggregated proteins; responsive to stresses including: heat, ethanol, and sodium arsenite; involved in [PSI+] propagation; protein becomes more abundant and forms cytoplasmic foci in response to DNA replication stress; potentiated Hsp104p variants decrease TDP-43 pr…	GO:0001319,GO:0005524,GO:0005634,GO:0005737,GO:0034975,GO:0035617,GO:0042623,GO:0043335,GO:0043531,GO:0051082,GO:0051087,GO:0070370,GO:0070389,GO:0070414,GO:0072380
YLR297W	YLR297W	chrXII	724044	724433	0	561.332	0.741261	0.199429	3.71691	0.000201677	0.0134503	0.000189077	407.152	516.084	520.522	900.311	1009.69	243.287	332.271	481.253	955.003	287.779	Protein of unknown function; green fluorescent protein (GFP)-fusion protein localizes to the vacuole; not an essential gene; induced by treatment with 8-methoxypsoralen and UVA irradiation; relocalizes from nucleus to vacuole upon DNA replication stress; YLR297W has a paralog, YOR186W, that arose from the whole genome duplication	GO:0000324,GO:0000329,GO:0003674,GO:0005634,GO:0005737,GO:0008150
YNL169C	PSD1	chrXIV	316169	317671	1	2675.5	-0.512651	0.144944	-3.53689	0.000404871	0.0134755	0.000191585	2556.92	2327.63	2455.55	2257.27	2149.73	3887.82	3093.56	2446.7	2203.5	3490.69	Phosphatidylserine decarboxylase of the mitochondrial inner membrane; converts phosphatidylserine to phosphatidylethanolamine; regulates mitochondrial fusion and morphology by affecting lipid mixing in the mitochondrial membrane and by influencing the ratio of long to short forms of Mgm1p; partly exposed to the mitochondrial intermembrane space	GO:0004609,GO:0005739,GO:0006656,GO:0010636,GO:0010954,GO:0031305
YKR061W	KTR2	chrXI	557677	558954	0	2033.7	-0.684786	0.172868	-3.96132	7.45369e-05	0.0142289	0.000204569	1955.5	1534.52	2027.91	1574.15	1232.6	3094.75	2816.49	1839.31	1403.38	2955.62	Mannosyltransferase involved in N-linked protein glycosylation; member of the KRE2/MNT1 mannosyltransferase family; KTR2 has a paralog, YUR1, that arose from the whole genome duplication	GO:0000030,GO:0000032,GO:0005794,GO:0006487
YDL124W	YDL124W	chrIV	240259	241197	0	9680.15	-0.541771	0.149824	-3.61604	0.000299139	0.0155431	0.000227421	8367.57	7171.87	9572.57	8762.71	9517.01	11897.2	12472.1	8370.67	9139.86	12184.7	NADPH-dependent alpha-keto amide reductase; reduces aromatic alpha-keto amides, aliphatic alpha-keto esters, and aromatic alpha-keto esters; member of the aldo-keto reductase (AKR) family; protein abundance increases in response to DNA replication stress	GO:0004032,GO:0004033,GO:0005634,GO:0005737,GO:0005886,GO:0006725,GO:0034599,GO:0042180,GO:0043603,GO:0051268,GO:0051269
YLR047C	FRE8	chrXII	239347	241407	1	432.382	-0.883582	0.237421	-3.72159	0.000197976	0.0155431	0.000228429	365.274	358.594	308.636	396.322	326.805	808.572	462.471	344.168	361.564	635.521	Protein with sequence similarity to iron/copper reductases; involved in iron homeostasis; deletion mutant has iron deficiency/accumulation growth defects; expression increased in the absence of copper-responsive transcription factor Mac1p	GO:0000329,GO:0006875,GO:0016020,GO:0016021,GO:0016722
YCR068W	ATG15	chrIII	237214	238776	0	583.492	-1.02848	0.284587	-3.61393	0.000301589	0.0158376	0.000235288	525.808	453.088	387.005	472.431	388.199	1297.53	560.382	455.3	430.315	928.956	Lipase required for intravacuolar lysis of autophagic and Cvt bodies; targeted to intravacuolar vesicles during autophagy via the multivesicular body (MVB) pathway	GO:0003674,GO:0005775,GO:0006624,GO:0006914,GO:0016021,GO:0030397,GO:0034496,GO:0034727
YCR020C	PET18	chrIII	154012	154659	1	3127.18	0.522024	0.142393	3.66607	0.000246304	0.0164028	0.000246304	3171.14	3589.97	3325.34	3396.12	3725.2	2126.38	2556.09	3362.15	3560.66	2341.23	Protein of unknown function; has weak similarity to proteins involved in thiamin metabolism; expression is induced in the absence of thiamin	GO:0003674,GO:0005829,GO:0006772
YEL060C	PRB1	chrV	40046	41953	1	13098.2	-0.714443	0.198724	-3.59514	0.000324214	0.0166316	0.000253187	14593.5	10332.2	12434.5	7956.15	5506.57	17963.9	22900.7	12453.4	6731.36	20432.3	Vacuolar proteinase B (yscB) with H3 N-terminal endopeptidase activity; serine protease of the subtilisin family; involved in protein degradation in the vacuole and required for full protein degradation during sporulation; activity inhibited by Pbi2p; protein abundance increases in response to DNA replication stress; PRB1 has a paralog, YSP3, that arose from the whole genome duplication	GO:0000324,GO:0000328,GO:0004252,GO:0007039,GO:0009267,GO:0030435
YIR042C	YIR042C	chrIX	435273	435983	1	290.474	0.822288	0.227352	3.61681	0.000298256	0.0166316	0.000255053	307.109	281.867	359.915	346.202	381.587	143.11	213.528	316.297	363.895	178.319	Putative protein of unknown function; YIR042C is a non-essential gene	GO:0003674,GO:0005575,GO:0008150
YJL048C	UBX6	chrX	347447	348637	1	1228.57	-0.519497	0.133383	-3.89477	9.82902e-05	0.0174093	0.000269761	1164.46	1046.71	1114.57	1063.67	1034.25	1575.4	1600.94	1108.58	1048.96	1588.17	UBX (ubiquitin regulatory X) domain-containing protein; interacts with Cdc48p, transcription is repressed when cells are grown in media containing inositol and choline; UBX6 has a paralog, UBX7, that arose from the whole genome duplication	GO:0003674,GO:0005634,GO:0006511,GO:0030435
YKL103C	APE1	chrXI	246138	247682	1	4015.01	-0.498162	0.139914	-3.5605	0.000370149	0.0179756	0.000281407	3830.72	3610.97	3553.67	3442.53	3316.22	4611.72	5739.23	3665.12	3379.37	5175.47	Vacuolar aminopeptidase yscI; zinc metalloproteinase that belongs to the peptidase family M18; often used as a marker protein in studies of autophagy and cytosol to vacuole targeting (CVT) pathway; protein increases in abundance and relative distribution to cytoplasmic foci increases upon DNA replication stress	GO:0000324,GO:0005737,GO:0007039,GO:0070006
YPL250C	ATG41	chrXVI	74309	74719	1	1307.72	0.621557	0.161595	3.84638	0.000119878	0.0180873	0.000286045	1186.56	1498.99	1278.08	1686.46	1786.09	783.527	934.317	1321.21	1736.28	858.922	Protein of unknown function; mobilized into polysomes upon a shift from a fermentable to nonfermentable carbon source; potential Cdc28p substrate; ICY2 has a paralog, ICY1, that arose from the whole genome duplication	GO:0000422,GO:0003674,GO:0005575
YOL163W	YOL163W	chrXV	9597	10106	0	76.9827	-1.12152	0.314105	-3.57052	0.000356268	0.0190718	0.000304662	57.0013	57.3427	72.5634	45.4796	34.9473	153.843	117.701	62.3025	40.2135	135.772	Putative protein of unknown function; member of the Dal5p subfamily of the major facilitator family	GO:0016020,GO:0016021,GO:0022857,GO:0055085
YDR391C	YDR391C	chrIV	1257358	1258056	1	1499.29	-0.533375	0.14842	-3.59369	0.000326028	0.0202073	0.000326028	1485.52	1266.38	1514.16	1111	1003.08	2168.12	1946.75	1422.02	1057.04	2057.44	Putative protein of unknown function; possibly involved in zinc homeostasis; Bdf1p-dependent transcription induced by salt stress; green fluorescent protein (GFP)-fusion protein localizes to both the cytoplasm and the nucleus	GO:0003674,GO:0005634,GO:0005737,GO:0008150
YPL019C	VTC3	chrXVI	514511	517018	1	3008.39	-0.442876	0.126511	-3.50069	0.000464057	0.0216523	0.000352801	2859.37	2876.02	2589.06	2567.28	2623.88	3634.99	3908.09	2774.82	2595.58	3771.54	Subunit of vacuolar transporter chaperone (VTC) complex; involved in membrane trafficking, vacuolar polyphosphate accumulation, microautophagy and non-autophagic vacuolar fusion; VTC3 has a paralog, VTC2, that arose from the whole genome duplication	GO:0000329,GO:0003674,GO:0005783,GO:0006797,GO:0007034,GO:0016021,GO:0016237,GO:0033254,GO:0042144
YLR413W	YLR413W	chrXII	951156	953183	0	3703.56	0.585652	0.168154	3.48284	0.000496127	0.0235472	0.000387438	3446.84	3871.84	4143.85	4414.31	4954.02	2950.45	2143.62	3820.84	4684.16	2547.03	Putative protein of unknown function; not an essential gene; YLR413W has a paralog, FAT3, that arose from the whole genome duplication	GO:0003674,GO:0005886,GO:0008150,GO:0016021
YBL017C	PEP1	chrII	186844	191583	1	7375.35	-0.603116	0.1772	-3.4036	0.000665045	0.0241135	0.000400608	6562.13	5903.06	7583.36	5566.15	5709.64	11980.7	8322.4	6682.85	5637.89	10151.5	Type I transmembrane sorting receptor for multiple vacuolar hydrolases; cycles between the late-Golgi and prevacuolar endosome-like compartments	GO:0005048,GO:0005794,GO:0006623,GO:0007034,GO:0016021
YCL064C	CHA1	chrIII	15798	16880	1	8877.01	0.522989	0.148917	3.51195	0.000444834	0.0260249	0.000444834	9452.92	10799	9322.95	8936.28	9907.1	6086.95	7633.9	9858.29	9421.69	6860.42	Catabolic L-serine (L-threonine) deaminase; catalyzes the degradation of both L-serine and L-threonine; required to use serine or threonine as the sole nitrogen source, transcriptionally induced by serine and threonine	GO:0003941,GO:0004794,GO:0005739,GO:0006565,GO:0006567,GO:0042645
YDR034W-B	YDR034W-B	chrIV	521314	521469	0	149.63	-1.04151	0.293269	-3.55137	0.000383224	0.0260249	0.000442172	145.412	107.417	138.354	45.4796	74.6173	326.768	209.362	130.394	60.0485	268.065	Predicted tail-anchored plasma membrane protein; contains conserved CYSTM module; related proteins in other organisms may be involved in response to stress; green fluorescent protein (GFP)-fusion protein localizes to the cell periphery; YDR034W-B has a paralog, YBR056W-A, that arose from the whole genome duplication	GO:0003674,GO:0005575,GO:0008150
YJL225C	YJL225C	chrX	466	6130	1	1030.89	-0.53585	0.153277	-3.49596	0.000472354	0.0260249	0.000442843	934.124	851.256	803.035	1109.15	1017.25	1353.58	1147.85	862.805	1063.2	1250.71	Putative Y' element ATP-dependent helicase	GO:0004386,GO:0005575,GO:0008150
YER150W	SPI1	chrV	468370	468816	0	1351.07	-0.542881	0.144151	-3.76604	0.000165855	0.0263844	0.000455194	948.084	911.829	1093.29	1877.66	1758.7	1434.68	1433.24	984.4	1818.18	1433.96	GPI-anchored cell wall protein involved in weak acid resistance; basal expression requires Msn2p/Msn4p; expression is induced under conditions of stress and during the diauxic shift; SPI1 has a paralog, SED1, that arose from the whole genome duplication	GO:0003674,GO:0009277,GO:0010447
YIL094C	LYS12	chrIX	186517	187632	1	26136.2	0.42384	0.128572	3.2965	0.00097896	0.0266047	0.000463244	26368.4	28567.1	25806.5	31046.8	31039.9	18464.8	21660.1	26914	31043.3	20062.4	Homo-isocitrate dehydrogenase; an NAD-linked mitochondrial enzyme required for the fourth step in the biosynthesis of lysine, in which homo-isocitrate is oxidatively decarboxylated to alpha-ketoadipate	GO:0005739,GO:0009085,GO:0047046
YER062C	GPP2	chrV	279930	280682	1	3987.7	-0.558669	0.159896	-3.49395	0.000475926	0.0270845	0.000475926	3577.13	3375.14	3280.83	4173.91	3460.73	4335.04	5711.1	3411.03	3817.32	5023.07	DL-glycerol-3-phosphate phosphatase involved in glycerol biosynthesis; also known as glycerol-1-phosphatase; induced in response to hyperosmotic or oxidative stress, and during diauxic shift; GPP2 has a paralog, GPP1, that arose from the whole genome duplication	GO:0000121,GO:0005634,GO:0005737,GO:0006114,GO:0006970,GO:0044262
YMR194C-A	YMR194C-A	chrXIII	652912	653136	1	90.3397	1.26637	0.364024	3.47881	0.000503639	0.0284034	0.000503639	93.0634	134.876	119.972	62.1864	125.622	47.7033	48.9553	115.97	93.904	48.3293	Dubious open reading frame; unlikely to encode a functional protein, based on available experimental and comparative sequence data	GO:0003674,GO:0005575,GO:0008150
YHR067W	HTD2	chrVIII	230970	231812	0	610.353	-0.541321	0.159372	-3.39658	0.000682326	0.0297474	0.000532324	543.258	524.968	543.742	596.804	499.653	819.305	744.745	537.323	548.228	782.025	Mitochondrial 3-hydroxyacyl-thioester dehydratase; involved in fatty acid biosynthesis, required for respiratory growth and for normal mitochondrial morphology	GO:0005739,GO:0006633,GO:0019171
YNL217W	YNL217W	chrXIV	240331	241311	0	3750.61	-0.601125	0.180913	-3.32273	0.000891424	0.0297474	0.000536973	3239.77	2933.36	3903.91	3126.96	2859.07	5941.45	4249.74	3359.01	2993.01	5095.59	Putative protein of unknown function; weak sequence similarity to bis (5'-nucleotidyl)-tetraphosphatases; (GFP)-fusion protein localizes to the vacuole; null mutant is highly sensitive to azaserine and resistant to sodium-O-vandate	GO:0000324,GO:0008150,GO:0016791
YGR288W	MAL13	chrVII	1070293	1071714	0	347.905	-0.681184	0.200019	-3.4056	0.000660194	0.0310015	0.000564564	342.008	286.713	264.131	329.495	259.744	503.27	449.972	297.617	294.619	476.621	MAL-activator protein; part of complex locus MAL1; nonfunctional in genomic reference strain S288C	GO:0003700,GO:0005634,GO:0006355,GO:0044262
YDR129C	SAC6	chrIV	713340	715379	1	9283.12	-0.458323	0.142933	-3.20655	0.00134335	0.0346028	0.000635675	9608.8	8099.04	8961.1	7497.64	6390.64	11436.9	12987.7	8889.65	6944.14	12212.3	Fimbrin, actin-bundling protein; cooperates with Scp1p (calponin/transgelin) in the organization and maintenance of the actin cytoskeleton; relocalizes from plasma membrane to cytoplasm upon DNA replication stress	GO:0005737,GO:0005886,GO:0005934,GO:0007015,GO:0030479,GO:0030674,GO:0032432,GO:0043332,GO:0051015
YIL051C	MMF1	chrIX	257843	258280	1	15331.7	0.508337	0.152966	3.32321	0.000889888	0.0375025	0.000694935	16079	17589.7	17255.6	15022.2	17508.6	10337.3	13529.4	16974.8	16265.4	11933.3	Mitochondrial protein required for transamination of isoleucine; but not of valine or leucine; may regulate specificity of branched-chain transaminases Bat1p and Bat2p; induction of expression in response to stress is mediated by a Hog1p-regulated antisense RNA and gene looping; interacts genetically with mitochondrial ribosomal protein genes; MMF1 has a paralog, HMF1, that arose from the whole g…	GO:0003674,GO:0005739,GO:0005759,GO:0009097,GO:0032543
YMR140W	SIP5	chrXIII	547714	549183	0	582.662	-0.679931	0.196328	-3.46325	0.000533695	0.0384646	0.000718908	578.157	441.781	441.186	592.163	466.594	851.505	707.248	487.041	529.379	779.376	Protein of unknown function; interacts with both the Reg1p/Glc7p phosphatase and the Snf1p kinase; forms cytoplasmic foci upon DNA replication stress	GO:0003674,GO:0005737,GO:0042149
YOR209C	NPT1	chrXV	736437	737726	1	9267.35	-0.491016	0.155628	-3.15507	0.0016046	0.0402815	0.000759299	9690.23	8013.43	9403.25	6854.43	5515.07	11721.9	13673.1	9035.64	6184.75	12697.5	Nicotinate phosphoribosyltransferase; acts in the salvage pathway of NAD+ biosynthesis; required for silencing at rDNA and telomeres and has a role in silencing at mating-type loci; localized to the nucleus	GO:0000183,GO:0001302,GO:0004516,GO:0005634,GO:0006348,GO:0019358
YHR049C-A	YHR049C-A	chrVIII	207234	207530	1	315.136	0.765481	0.230507	3.32087	0.000897387	0.0403691	0.000767399	304.783	394.937	389.907	274.734	413.701	212.28	215.612	363.209	344.217	213.946	Dubious open reading frame; unlikely to encode a functional protein, based on available experimental and comparative sequence data	GO:0003674,GO:0005575,GO:0008150
YDR038C	ENA5	chrIV	527422	530697	1	2019.03	-0.582859	0.173508	-3.35926	0.00078151	0.0407688	0.00078151	1948.52	1694.44	1919.54	1486.9	1529.18	3280.8	2273.82	1854.16	1508.04	2777.31	Protein with similarity to P-type ATPase sodium pumps; member of the Na+ efflux ATPase family	GO:0005886,GO:0006814,GO:0015662,GO:0016021,GO:0055085
YOR385W	YOR385W	chrXV	1065043	1065915	0	3051.5	-0.64368	0.196246	-3.27997	0.00103818	0.0416593	0.000810742	2782.6	2158.83	3489.82	2144.97	2005.22	3920.02	4859.07	2810.41	2075.09	4389.55	Putative protein of unknown function; green fluorescent protein (GFP)-fusion protein localizes to the cytoplasm; YOR385W is not an essential gene	GO:0003674,GO:0005737,GO:0008150
YPL018W	CTF19	chrXVI	517651	518760	0	262.391	-0.711146	0.212612	-3.34481	0.000823403	0.0416593	0.000818546	244.291	225.332	174.152	246.889	244.631	324.383	377.06	214.592	245.76	350.721	Outer kinetochore protein, needed for accurate chromosome segregation; component of the kinetochore sub-complex COMA (Ctf19p, Okp1p, Mcm21p, Ame1p) that functions as a platform for kinetochore assembly; required for the spindle assembly checkpoint; orthologous to human centromere constitutive-associated network (CCAN) subunit CENP-P and fission yeast fta2	GO:0000778,GO:0000817,GO:0003674,GO:0005634,GO:0007059,GO:0007094,GO:0008608,GO:0034087
YPL132W	COX11	chrXVI	301716	302618	0	867.193	0.481742	0.146976	3.2777	0.00104657	0.0416593	0.000816491	873.633	953.826	951.064	933.724	1031.42	639.225	687.457	926.175	982.572	663.341	Protein required for delivery of copper to Cox1p; mitochondrial inner membrane protein; association with mitochondrial ribosomes suggests that copper delivery may occur during translation of Cox1p	GO:0005507,GO:0005739,GO:0005740,GO:0005743,GO:0005758,GO:0005761,GO:0006461,GO:0009060
YER110C	KAP123	chrV	378762	382103	1	4749.86	0.402563	0.128927	3.1224	0.00179382	0.0418408	0.000848836	4883.5	5205.26	4824.98	5552.22	5261.94	3494.27	4026.83	4971.25	5407.08	3760.55	Karyopherin beta; mediates nuclear import of ribosomal proteins prior to assembly into ribosomes and import of histones H3 and H4; localizes to the nuclear pore, nucleus, and cytoplasm; exhibits genetic interactions with RAI1	GO:0005634,GO:0005643,GO:0005737,GO:0006606,GO:0006607,GO:0006610,GO:0008139,GO:0008565,GO:0016021,GO:2000220
YMR085W	YMR085W	chrXIII	437491	438789	0	270.777	-0.651433	0.190829	-3.41371	0.000640859	0.0418408	0.000848848	247.781	235.024	251.553	196.769	196.461	347.042	420.807	244.786	196.615	383.924	Putative protein of unknown function; YMR085W and adjacent ORF YMR084W are merged in related strains, and together are paralogous to glutamine-fructose-6-phosphate amidotransferase GFA1	GO:0003674,GO:0005575,GO:0008150
YMR250W	GAD1	chrXIII	770801	772558	0	3418.95	-0.460722	0.147523	-3.12305	0.00178987	0.0418408	0.000846967	3297.94	2987.47	2848.36	3397.98	3023.42	3775.72	4601.8	3044.59	3210.7	4188.76	Glutamate decarboxylase; converts glutamate into gamma-aminobutyric acid (GABA) during glutamate catabolism; involved in response to oxidative stress	GO:0004351,GO:0005737,GO:0006538,GO:0034599
YNR059W	MNT4	chrXIV	736803	738545	0	2273.21	-0.7013	0.224533	-3.12338	0.00178789	0.0418408	0.000846028	2063.68	1706.55	2712.9	1204.75	1196.71	4337.43	2690.46	2161.05	1200.73	3513.94	Putative alpha-1,3-mannosyltransferase; not required for protein O-glycosylation	GO:0000033,GO:0005575,GO:0006493
YHR087W	RTC3	chrVIII	280820	281155	0	679.088	-0.528547	0.163034	-3.24194	0.00118719	0.0443112	0.000926199	576.993	520.122	595.02	647.852	787.732	789.49	836.406	564.045	717.792	812.948	Protein of unknown function involved in RNA metabolism; has structural similarity to SBDS, the human protein mutated in Shwachman-Diamond Syndrome (the yeast SBDS ortholog = SDO1); null mutation suppresses cdc13-1 temperature sensitivity; protein abundance increases in response to DNA replication stress	GO:0003674,GO:0005634,GO:0005737,GO:0016070
YIL155C	GUT2	chrIX	51759	53708	1	776.681	-0.523773	0.161426	-3.24466	0.0011759	0.0443112	0.000917392	793.366	628.346	703.381	677.553	599.772	1029.2	1005.15	708.364	638.663	1017.17	Mitochondrial glycerol-3-phosphate dehydrogenase; expression is repressed by both glucose and cAMP and derepressed by non-fermentable carbon sources in a Snf1p, Rsf1p, Hap2/3/4/5 complex dependent manner	GO:0001302,GO:0004368,GO:0005739,GO:0006071,GO:0006116,GO:0031307
YOR328W	PDR10	chrXV	931803	936497	0	718.289	-0.635185	0.18392	-3.4536	0.000553151	0.0443112	0.00092728	729.385	595.233	616.305	598.66	479.818	1122.22	886.403	646.974	539.239	1004.31	ATP-binding cassette (ABC) transporter; multidrug transporter involved in the pleiotropic drug resistance network; regulated by Pdr1p and Pdr3p	GO:0005886,GO:0006855,GO:0016021,GO:0042626
YPR014C	YPR014C	chrXVI	587189	587518	1	104.453	0.919052	0.277346	3.31374	0.000920564	0.0443112	0.000915133	109.35	130.838	130.614	110.45	119.01	63.2069	67.7041	123.601	114.73	65.4555	Dubious open reading frame; unlikely to encode a functional protein, based on available experimental and comparative sequence data; YPR014C is not an essential gene	GO:0003674,GO:0005575,GO:0008150
YJL139C	YUR1	chrX	151713	152999	1	1241.8	-0.554805	0.16404	-3.38213	0.000719259	0.0459479	0.000968869	1159.8	1060.44	1220.03	889.173	993.638	1908.13	1461.37	1146.76	941.405	1684.75	Mannosyltransferase involved in protein N-glycosylation; member of the KTR1 family; located in the Golgi apparatus; YUR1 has a paralog, KTR2, that arose from the whole genome duplication	GO:0000030,GO:0000032,GO:0005794,GO:0006487
YJL034W	KAR2	chrX	381327	383375	0	16873.2	-0.62384	0.193591	-3.22247	0.00127091	0.0467139	0.000992484	14567.9	13406.9	16685.7	12635.9	14934.8	28087.7	17793.7	14886.8	13785.3	22940.7	ATPase involved in protein import into the ER; also acts as a chaperone to mediate protein folding in the ER and may play a role in ER export of soluble proteins; regulates the unfolded protein response via interaction with Ire1p	GO:0000742,GO:0005783,GO:0006616,GO:0006986,GO:0016887,GO:0030433,GO:0031204,GO:0034099,GO:0051082
YJL082W	IML2	chrX	281185	283380	0	1085.11	-0.530593	0.162457	-3.26605	0.0010906	0.0477658	0.00102246	958.553	912.637	898.819	1199.18	960.58	1205.7	1460.33	923.336	1079.88	1333.01	Protein of unknown function; the authentic, non-tagged protein is detected in highly purified mitochondria in high-throughput studies; protein abundance increases in response to DNA replication stress; IML2 has a paralog, YKR018C, that arose from the whole genome duplication	GO:0003674,GO:0005634,GO:0005737,GO:0005739,GO:0005741,GO:0008150
YLR303W	MET17	chrXII	732542	733876	0	11337.3	-0.363292	0.116218	-3.12597	0.00177221	0.0495022	0.00106754	11459.6	10680.3	10544.9	9483.89	9164.7	13783.9	14243.9	10894.9	9324.3	14013.9	O-acetyl homoserine-O-acetyl serine sulfhydrylase; required for Methionine and cysteine biosynthesis	GO:0003961,GO:0004124,GO:0005737,GO:0005886,GO:0006555,GO:0019344
YIL101C	XBP1	chrIX	175307	177250	1	449.789	-0.528537	0.164203	-3.2188	0.0012873	0.0503008	0.00110083	433.908	394.937	380.232	406.532	371.197	586.751	574.964	403.026	388.865	580.858	Transcriptional repressor; binds to promoter sequences of the cyclin genes, CYS3, and SMF2; expression is induced by stress or starvation during mitosis, and late in meiosis; member of the Swi4p/Mbp1p family; potential Cdc28p substrate; relative distribution to the nucleus increases upon DNA replication stress	GO:0003700,GO:0005634,GO:0005737,GO:0034599,GO:0034605,GO:0042149,GO:0043565,GO:0071472
YMR145C	NDE1	chrXIII	554793	556475	1	2971.39	0.521997	0.163891	3.18502	0.00144743	0.0503008	0.00110041	2962.91	3234.61	2646.15	3997.56	3853.65	1751.9	2352.98	2947.89	3925.61	2052.44	Mitochondrial external NADH dehydrogenase; type II NAD(P)H:quinone oxidoreductase that catalyzes the oxidation of cytosolic NADH; Nde1p and Nde2p provide cytosolic NADH to the mitochondrial respiratory chain; NDE1 has a paralog, NDE2, that arose from the whole genome duplication	GO:0001300,GO:0003954,GO:0005739,GO:0006116,GO:0019655
YHR138C	YHR138C	chrVIII	377355	377699	1	1738.94	-0.803662	0.247026	-3.25335	0.00114055	0.0513657	0.00114055	1542.53	1300.31	1837.31	728.602	1317.61	3239.06	2207.15	1560.05	1023.11	2723.11	Protein of unknown function; similar to Pbi2p; double null mutant lacking Pbi2p and Yhr138cp exhibits highly fragmented vacuoles; protein abundance increases in response to DNA replication stress	GO:0004866,GO:0005575,GO:0042144
YJL016W	YJL016W	chrX	405588	407273	0	1776.06	-0.55075	0.157629	-3.49395	0.000475926	0.0513657	0.00113563	1679.79	1325.34	1725.07	1488.76	1596.24	2409.02	2208.2	1576.74	1542.5	2308.61	Putative protein of unknown function; GFP-fusion protein localizes to the cytoplasm; conserved in closely related Saccharomyces species	GO:0003674,GO:0005737,GO:0008150
YJR091C	JSN1	chrX	595061	598336	1	1917.66	-0.690844	0.201333	-3.43135	0.000600589	0.051724	0.00115677	1742.61	1561.17	1613.81	1765.35	1447.95	3285.57	2007.17	1639.2	1606.65	2646.37	Member of the Puf family of RNA-binding proteins; interacts with mRNAs encoding membrane-associated proteins; involved in localizing the Arp2/3 complex to mitochondria; overexpression causes increased sensitivity to benomyl; JSN1 has a paralog, PUF2, that arose from the whole genome duplication	GO:0000288,GO:0003729,GO:0005737,GO:0009277,GO:0032473,GO:0034629,GO:0051654
YBR036C	CSG2	chrII	309081	310313	1	5711.07	-0.51243	0.166327	-3.08086	0.00206406	0.0547733	0.00124334	5368.6	4917.74	5998.58	3886.19	4319.3	8939.6	6547.51	5428.3	4102.74	7743.56	Endoplasmic reticulum membrane protein; required for mannosylation of inositolphosphorylceramide and for growth at high calcium concentrations; protein abundance increases in response to DNA replication stress	GO:0006688,GO:0006874,GO:0016021,GO:0030176,GO:0030234
YNL092W	YNL092W	chrXIV	450871	452073	0	295.245	-0.636305	0.197059	-3.22901	0.00124219	0.0547733	0.00123486	276.864	244.716	268.001	261.74	198.35	398.323	418.724	263.193	230.045	408.523	S-adenosylmethionine-dependent protein methyltransferase; capable of automethylation; member of the seven beta-strand family; YNL092W is not an essential gene	GO:0005575,GO:0006479,GO:0008757
YOR173W	DCS2	chrXV	657264	658325	0	1002.71	-0.463354	0.143589	-3.22694	0.00125121	0.0547733	0.00125121	855.02	881.139	960.74	901.239	940.745	1308.26	1171.8	898.966	920.992	1240.03	m(7)GpppX pyrophosphatase regulator; non-essential, stress induced regulatory protein; modulates m7G-oligoribonucleotide metabolism; inhibits Dcs1p; regulated by Msn2p, Msn4p, and the Ras-cAMP-cAPK signaling pathway; mutant has increased aneuploidy tolerance; DCS2 has a paralog, DCS1, that arose from the whole genome duplication	GO:0000290,GO:0000932,GO:0005737,GO:0050072
YBR132C	AGP2	chrII	499652	501442	1	573.34	-0.515095	0.163422	-3.15192	0.00162198	0.0550101	0.00126541	530.462	460.357	554.384	471.503	526.099	722.706	747.87	515.068	498.801	735.288	Plasma membrane regulator of polyamine and carnitine transport; has similarity to transporters but lacks transport activity; may act as a sensor that transduces environmental signals; has a positive or negative regulatory effect on transcription of many transporter genes	GO:0000329,GO:0003674,GO:0005789,GO:0005887,GO:0015203,GO:0016021,GO:1902269,GO:1902274
YKL218C	SRY1	chrXI	17359	18339	1	1700.23	-0.608652	0.173905	-3.49991	0.00046541	0.0551456	0.00127733	1819.39	1315.65	1792.8	1056.24	911.464	2411.4	2594.63	1642.61	983.853	2503.02	3-hydroxyaspartate dehydratase; deaminates L-threo-3-hydroxyaspartate to form oxaloacetate and ammonia; required in the presence of hydroxyaspartate; highly similar to mouse serine racemase (Srr) but has no serine racemase activity	GO:0005575,GO:0030378,GO:0030848,GO:0042219
YJL056C	ZAP1	chrX	330431	333073	1	816.877	-0.507345	0.161932	-3.13307	0.00172985	0.0574712	0.00134956	810.815	712.341	714.024	754.59	608.273	1016.08	1102.01	745.727	681.431	1059.05	Zinc-regulated transcription factor; binds to zinc-responsive promoters to induce transcription of certain genes in presence of zinc, represses other genes in low zinc; regulates its own transcription; contains seven zinc-finger domains	GO:0000977,GO:0000981,GO:0005634,GO:0008270,GO:0034225,GO:0045944,GO:0097236
YMR251W-A	HOR7	chrXIII	774752	774931	0	38609.8	-0.596761	0.199942	-2.98466	0.0028389	0.0574712	0.00134337	36882.2	31886.6	43604.8	18255	26343.7	65106.7	48189.7	37457.9	22299.3	56648.2	Protein of unknown function; overexpression suppresses Ca2+ sensitivity of mutants lacking inositol phosphorylceramide mannosyltransferases Csg1p and Csh1p; transcription is induced under hyperosmotic stress and repressed by alpha factor; HOR7 has a paralog, DDR2, that arose from the whole genome duplication	GO:0003674,GO:0005783,GO:0005886,GO:0007009
YLR213C	CRR1	chrXII	566654	567922	1	380.212	-0.683208	0.216455	-3.15635	0.00159756	0.0577843	0.00136615	412.969	277.829	395.712	180.99	233.297	595.099	565.59	362.17	207.144	580.344	Putative glycoside hydrolase of the spore wall envelope; required for normal spore wall assembly, possibly for cross-linking between the glucan and chitosan layers; expressed during sporulation	GO:0005619,GO:0016810,GO:0030476
YMR011W	HXT2	chrXIII	288079	289704	0	1159.46	-0.663949	0.193065	-3.43899	0.000583885	0.0585345	0.00139323	1315.68	942.519	1291.63	445.515	373.086	2107.29	1640.52	1183.28	409.301	1873.91	High-affinity glucose transporter of the major facilitator superfamily; expression is induced by low levels of glucose and repressed by high levels of glucose	GO:0005353,GO:0005355,GO:0005886,GO:0015146,GO:0015578,GO:0015758,GO:0016021
YPR198W	SGE1	chrXVI	934034	935665	0	2263.16	-0.632492	0.193691	-3.26546	0.00109285	0.061436	0.00147211	2143.95	1801.04	2531.01	1279	1394.12	3954.61	2738.37	2158.67	1336.56	3346.49	Plasma membrane multidrug transporter; member of the major facilitator superfamily; acts as an extrusion permease; partial multicopy suppressor of gal11 mutations	GO:0005887,GO:0015238,GO:0015893,GO:0016021,GO:0042493
YMR144W	YMR144W	chrXIII	553362	554390	0	481.164	0.588347	0.186256	3.15881	0.00158414	0.0615708	0.00148517	524.645	533.852	475.048	658.062	496.819	325.575	354.145	511.182	577.441	339.86	Putative protein of unknown function; localized to the nucleus; YMR144W is not an essential gene	GO:0003674,GO:0005634,GO:0008150
YLL062C	MHT1	chrXII	16639	17613	1	466.491	-0.506742	0.160429	-3.15868	0.00158487	0.0645614	0.00158487	451.358	408.667	419.9	373.118	401.422	589.136	621.836	426.642	387.27	605.486	S-methylmethionine-homocysteine methyltransferase; functions along with Sam4p in the conversion of S-adenosylmethionine (AdoMet) to methionine to control the methionine/AdoMet ratio	GO:0000096,GO:0005737,GO:0008898
YLR136C	TIS11	chrXII	415801	416658	1	370.413	-0.722446	0.228888	-3.15633	0.00159768	0.0645614	0.00158825	297.803	323.865	354.109	300.722	243.687	410.249	662.459	325.259	272.205	536.354	mRNA-binding protein expressed during iron starvation; binds to a sequence element in the 3'-untranslated regions of specific mRNAs to mediate their degradation; involved in iron homeostasis; protein increases in abundance and relative distribution to the nucleus increases upon DNA replication stress; TIS11 has a paralog, CTH1, that arose from the whole genome duplication	GO:0000956,GO:0003729,GO:0005634,GO:0005737,GO:0006879
YML013W	UBX2	chrXIII	244149	245903	0	972.785	-0.565335	0.179939	-3.14182	0.00167899	0.0645614	0.0015741	871.306	796.336	836.898	994.982	838.736	1444.22	1027.02	834.847	916.859	1235.62	Bridging factor involved in ER-associated protein degradation (ERAD); bridges the cytosolic Cdc48p-Npl1p-Ufd1p ATPase complex and the membrane associated Ssm4p and Hrd1p ubiquitin ligase complexes; contains a UBX (ubiquitin regulatory X) domain and a ubiquitin-associated (UBA) domain; redistributes from the ER to lipid droplets during the diauxic shift and stationary phase; required for the maint…	GO:0000837,GO:0000839,GO:0005741,GO:0005783,GO:0005811,GO:0005887,GO:0030176,GO:0030433,GO:0030674,GO:0034389,GO:0043161
YGR060W	ERG25	chrVII	610564	611493	0	6950.47	-0.50332	0.171922	-2.92761	0.00341581	0.0652801	0.00161636	6619.14	5974.14	7529.18	4625	4889.79	11111.3	7904.72	6707.48	4757.4	9508.01	C-4 methyl sterol oxidase; catalyzes the first of three steps required to remove two C-4 methyl groups from an intermediate in ergosterol biosynthesis; mutants accumulate the sterol intermediate 4,4-dimethylzymosterol	GO:0000254,GO:0005789,GO:0005886,GO:0006696
YER053C-A	YER053C-A	chrV	260933	261046	1	119.99	0.942154	0.304054	3.09864	0.00194411	0.0662882	0.0016625	66.3077	81.572	78.3685	242.249	292.802	36.9701	41.6641	75.416	267.525	39.3171	Protein of unknown function; green fluorescent protein (GFP)-fusion protein localizes to the endoplasmic reticulum; protein abundance increases in response to DNA replication stress	GO:0003674,GO:0005783,GO:0008150
YMR169C	ALD3	chrXIII	599352	600872	1	579.338	-0.541771	0.164451	-3.29441	0.000986279	0.0662882	0.00165336	525.808	456.318	567.93	520.695	481.707	747.75	755.161	516.685	501.201	751.456	Cytoplasmic aldehyde dehydrogenase; involved in beta-alanine synthesis; uses NAD+ as the preferred coenzyme; very similar to Ald2p; expression is induced by stress and repressed by glucose	GO:0004029,GO:0005737,GO:0006598,GO:0019483
YPR036W-A	SPO24	chrXVI	645950	646153	0	6940.56	0.460414	0.150594	3.05732	0.00223325	0.0672685	0.00169783	6649.38	6797.93	7541.76	9324.25	8102.12	4494.85	5673.6	6996.36	8713.18	5084.23	Small (67 amino acids) protein involved in sporulation; localizes to the prospore membrane; phosphorylated during meiosis; a longer, 5'-extended mRNA is also transcribed beginning in mid-meiosis, regulated by two MSEs (middle sporulation elements), and includes an uORF of 15 codons in its 5'-UTR; evidence transcription is regulated by Pdr1p	GO:0003674,GO:0005628,GO:0030435
YDL182W	LYS20	chrIV	133437	134723	0	22045.6	0.554913	0.190793	2.90845	0.00363221	0.0676696	0.00171876	23462.5	25847	19860.1	27182	26579.8	12235.9	19151.9	23056.5	26880.9	15693.9	Homocitrate synthase isozyme; catalyzes the condensation of acetyl-CoA and alpha-ketoglutarate to form homocitrate, which is the first step in the lysine biosynthesis pathway; LYS20 has a paralog, LYS21, that arose from the whole genome duplication	GO:0004410,GO:0005634,GO:0005739,GO:0019878
YDL248W	COS7	chrIV	1802	2953	0	673.474	-0.807034	0.251362	-3.21065	0.00132436	0.0697973	0.00178396	582.81	568.581	578.572	490.066	475.095	1370.28	648.918	576.654	482.58	1009.6	Protein of unknown function; member of the DUP380 subfamily of conserved, often subtelomerically-encoded proteins; the authentic, non-tagged protein is detected in highly purified mitochondria in high-throughput studies	GO:0004872,GO:0005739,GO:0008150,GO:0016021
YMR105C	PGM2	chrXIII	475897	477606	1	2916.15	-0.422725	0.146128	-2.89284	0.00381774	0.0702424	0.00180655	2501.08	2454.43	2837.71	2536.65	3118.81	3522.89	3441.45	2597.74	2827.73	3482.17	Phosphoglucomutase; catalyzes the conversion from glucose-1-phosphate to glucose-6-phosphate, which is a key step in hexose metabolism; functions as the acceptor for a Glc-phosphotransferase; protein abundance increases in response to DNA replication stress; PGM2 has a paralog, PGM1, that arose from the whole genome duplication	GO:0004614,GO:0005737,GO:0005978,GO:0005992,GO:0006011,GO:0006874,GO:0019255,GO:0019388,GO:0030003,GO:0051156
YOL083W	ATG34	chrXV	165714	166952	0	411.65	-0.549519	0.178935	-3.07105	0.00213304	0.0704856	0.00182407	367.601	345.671	397.648	344.346	341.917	601.062	483.303	370.306	343.131	542.183	Receptor protein involved in selective autophagy during starvation; specifically involved in the transport of cargo protein alpha-mannosidase (Ams1p); Atg19p paralog	GO:0006461,GO:0030674,GO:0031503,GO:0034270
YGR076C	MRPL25	chrVII	637104	637577	1	629.68	0.478371	0.153789	3.11056	0.0018673	0.0717136	0.0018673	686.343	657.421	650.168	723.961	736.728	444.834	508.302	664.644	730.344	476.568	Mitochondrial ribosomal protein of the large subunit; mutation confers increased replicative lifespan	GO:0003735,GO:0005739,GO:0005762,GO:0032543
YER028C	MIG3	chrV	210692	211876	1	379.105	-0.547035	0.176449	-3.10024	0.00193365	0.0733734	0.00192224	332.702	350.517	324.117	360.124	304.136	517.581	464.554	335.778	332.13	491.068	Transcriptional regulator; partially nonfunctional in S288C strains but has a major role in catabolite repression and ethanol response in some other strains; involved in response to toxic agents; phosphorylation by Snf1p or the Mec1p pathway inactivates Mig3p, allowing induction of damage response genesenvironment	GO:0000430,GO:0000790,GO:0000978,GO:0001078,GO:0006974,GO:0010768,GO:0034644,GO:0043565,GO:0045471
YOR303W	CPA1	chrXV	882899	884134	0	6897.78	0.436468	0.148232	2.94449	0.00323486	0.0739288	0.0019486	7334.56	7797.79	7035.75	7469.79	7727.14	4725.02	6194.41	7389.37	7598.47	5459.71	Small subunit of carbamoyl phosphate synthetase; carbamoyl phosphate synthetase catalyzes a step in the synthesis of citrulline, an arginine precursor; translationally regulated by an attenuator peptide encoded by YOR302W within the CPA1 mRNA 5'-leader	GO:0004088,GO:0005737,GO:0005951,GO:0006526
YPL154C	PEP4	chrXVI	259714	260931	1	16392.7	-0.46838	0.151294	-3.09582	0.00196271	0.0740156	0.00196271	14806.4	13332.6	17705.5	12636.8	13982.7	21935.2	20349.8	15281.5	13309.8	21142.5	Vacuolar aspartyl protease (proteinase A); required for posttranslational precursor maturation of vacuolar proteinases; important for protein turnover after oxidative damage; plays a protective role in acetic acid induced apoptosis; synthesized as a zymogen, self-activates	GO:0000324,GO:0005739,GO:0006914,GO:0008233,GO:0009267,GO:0016237,GO:0051603
YGR055W	MUP1	chrVII	599417	601141	0	7142.65	-0.554806	0.184959	-2.99962	0.00270316	0.0768727	0.00205508	6702.89	6144.55	7311.49	4449.58	5647.3	11742.2	8000.54	6719.64	5048.44	9871.36	High affinity methionine permease; integral membrane protein with 13 putative membrane-spanning regions; also involved in cysteine uptake	GO:0000101,GO:0000102,GO:0005887,GO:0015821,GO:0016021,GO:0042883,GO:0044690
YGR237C	YGR237C	chrVII	963298	965655	1	1256.26	-0.535024	0.163559	-3.27115	0.00107112	0.0768727	0.00206304	1227.27	1113.74	1010.08	1240.02	967.191	1565.86	1669.69	1117.03	1103.6	1617.77	Putative protein of unknown function; green fluorescent protein (GFP)-fusion protein localizes to the cytoplasm	GO:0003674,GO:0005737,GO:0008150
YKL163W	PIR3	chrXI	144401	145378	0	269.129	-0.680273	0.215247	-3.16042	0.00157541	0.0772944	0.0020867	205.903	235.832	185.762	299.794	286.19	285.027	385.393	209.166	292.992	335.21	O-glycosylated covalently-bound cell wall protein; required for cell wall stability; expression is cell cycle regulated, peaking in M/G1 and also subject to regulation by the cell integrity pathway; coding sequence contains length polymorphisms in different strains; PIR3 has a paralog, HSP150, that arose from the whole genome duplication	GO:0005199,GO:0009277,GO:0031505
YDR043C	NRG1	chrIV	542674	543369	1	673.443	0.559301	0.177034	3.15929	0.00158153	0.0784482	0.00213038	606.076	756.762	808.84	728.602	830.236	496.115	487.47	723.892	779.419	491.792	Transcriptional repressor; recruits the Cyc8p-Tup1p complex to promoters; mediates glucose repression and negatively regulates a variety of processes including filamentous growth and alkaline pH response; activated in stochastic pulses of nuclear localization in response to low glucose	GO:0000122,GO:0000433,GO:0000978,GO:0001078,GO:0001103,GO:0001191,GO:0005634,GO:0007124,GO:0043565,GO:0071475,GO:0090606,GO:1900460,GO:1900463,GO:1900464,GO:2000218
YJL094C	KHA1	chrX	251821	254442	1	2840.71	-0.574247	0.203062	-2.82795	0.00468479	0.0811545	0.00221684	2943.13	2377.7	3070.88	1788.56	1375.23	5025.55	3303.96	2797.24	1581.89	4164.75	Putative K+/H+ antiporter; has a probable role in intracellular cation homeostasis; localized to Golgi vesicles and detected in highly purified mitochondria in high-throughput studies	GO:0005739,GO:0005794,GO:0015386,GO:0015672,GO:0016021
YJR074W	MOG1	chrX	573095	573751	0	1876.85	-0.504887	0.152602	-3.30852	0.000937889	0.0814505	0.00223794	1661.18	1554.71	1856.66	1605.71	1660.47	2653.5	2145.7	1690.85	1633.09	2399.6	Conserved nuclear protein that interacts with GTP-Gsp1p; stimulates nucleotide release from Gsp1p; involved in nuclear protein import; nucleotide release is inhibited by Yrb1p	GO:0005634,GO:0006606,GO:0008536
YCR041W	YCR041W	chrIII	200911	201243	0	460.859	0.686445	0.228563	3.00331	0.00267061	0.0826379	0.00228376	473.46	595.233	557.287	347.13	578.992	320.805	353.103	541.993	463.061	336.954	Uncharacterized open reading frame; overexpression suppresses the high-frequency loss of mini-chromosomes, probably by increasing the rate of proper chromosome segregation; translated gene product of YCR041W, but not its transcript, is responsible for suppression; suppression ability of YCR041W is completely dependent on silencing protein Sir4p	GO:0003674,GO:0008150,GO:0016021
YCR106W	RDS1	chrIII	310958	313456	0	279.741	-0.799868	0.266754	-2.99852	0.00271296	0.083466	0.00231998	273.374	215.641	166.412	330.423	212.518	431.715	328.105	218.476	271.47	379.91	Putative zinc cluster transcription factor; involved in conferring resistance to cycloheximide	GO:0003677,GO:0005575,GO:0009410,GO:0043565
YNL231C	PDR16	chrXIV	215987	217042	1	2566.93	0.363577	0.122829	2.96003	0.00307606	0.0836544	0.00233858	2522.02	2562.65	2574.55	3178	3163.21	1897.4	2070.7	2553.07	3170.61	1984.05	Phosphatidylinositol transfer protein (PITP); controlled by the multiple drug resistance regulator Pdr1p; localizes to lipid particles and microsomes; controls levels of various lipids, may regulate lipid synthesis; homologous to Pdr17p; protein abundance increases in response to DNA replication stress	GO:0005737,GO:0005811,GO:0005886,GO:0008525,GO:0008526,GO:0008654,GO:0015914,GO:0016126,GO:0042493,GO:0043942,GO:0071944
YBR287W	YBR287W	chrII	776571	777854	0	6296.64	-0.609982	0.211737	-2.88085	0.0039661	0.0839697	0.00238909	6029.35	4773.98	7464.36	3384.98	3836.65	11187.6	7399.54	6089.23	3610.82	9293.58	Protein of unknown function; green fluorescent protein (GFP)-fusion protein localizes to the ER; YBR287W is not an essential gene	GO:0003674,GO:0005783,GO:0008150,GO:0016021
YKL084W	HOT13	chrXI	280509	280859	0	427.275	0.553954	0.179947	3.07843	0.00208095	0.0839697	0.00240105	459.501	432.089	537.937	433.449	478.873	330.346	318.73	476.509	456.161	324.538	Zinc-binding mitochondrial intermembrane space (IMS) protein; involved in a disulfide relay system for IMS import of cysteine-containing proteins; binds Mia40p and stimulates its Erv1p-dependent oxidation, probably by sequestering zinc	GO:0005758,GO:0008270,GO:0045041
YLR449W	FPR4	chrXII	1030834	1032012	0	3521.67	0.450508	0.152589	2.95243	0.00315279	0.0839697	0.00239692	3745.8	4010.76	3576.89	3864.84	3925.44	2379.2	3148.76	3777.82	3895.14	2763.98	Peptidyl-prolyl cis-trans isomerase (PPIase); nuclear proline isomerase; affects expression of multiple genes via its role in nucleosome assembly; catalyzes isomerization of proline residues in histones H3 and H4, which affects lysine methylation of those histones; PPIase domain acts as a transcriptional repressor when tethered to DNA by lexA, and repressor activity is dependent on PPIase activit…	GO:0000412,GO:0000415,GO:0000785,GO:0003755,GO:0005527,GO:0005634,GO:0005730,GO:0006334
YPR157W	TDA6	chrXVI	841266	842669	0	353.035	0.713512	0.234906	3.03743	0.00238604	0.0839697	0.00238604	252.435	327.095	308.636	479.856	741.45	183.658	178.114	296.055	610.653	180.886	Putative protein of unknown function; induced by treatment with 8-methoxypsoralen and UVA irradiation; null mutant is sensitive to expression of the top1-T722A allele; TDA6 has a paralog, VPS62, that arose from the whole genome duplication	GO:0003674,GO:0005575,GO:0008150
YPL214C	THI6	chrXVI	148569	150191	1	4551.57	0.396517	0.130793	3.03164	0.00243233	0.0845909	0.00243233	4437.96	4809.51	5043.64	4854.25	5477.29	3539.59	3698.73	4763.71	5165.77	3619.16	Thiamine-phosphate diphosphorylase and hydroxyethylthiazole kinase; required for thiamine biosynthesis; GFP-fusion protein localizes to the cytoplasm in a punctate pattern	GO:0004417,GO:0004789,GO:0005737,GO:0005829,GO:0009228
YNR019W	ARE2	chrXIV	665339	667267	0	3734.24	-0.564069	0.190936	-2.95423	0.00313455	0.0846602	0.00244784	3496.86	2988.28	4487.32	2022.45	2330.14	6094.1	4720.54	3657.49	2176.29	5407.32	Acyl-CoA:sterol acyltransferase; endoplasmic reticulum enzyme that contributes the major sterol esterification activity in the presence of oxygen; ARE2 has a paralog, ARE1, that arose from the whole genome duplication	GO:0005783,GO:0008204,GO:0016021,GO:0034737
YPR145C-A	YPR145C-A	chrXVI	824690	824926	1	176.065	-0.962964	0.314718	-3.05977	0.00221505	0.0879074	0.00255577	144.248	87.2255	205.113	128.085	102.008	264.754	301.023	145.529	115.047	282.888	Putative protein of unknown function	GO:0003674,GO:0005575,GO:0008150
YMR266W	RSN1	chrXIII	798518	801379	0	2825.52	-0.468328	0.155546	-3.01087	0.002605	0.0891109	0.002605	2638.35	2593.34	2777.73	2214.58	2165.79	4251.56	3137.3	2669.81	2190.18	3694.43	Membrane protein of unknown function; overexpression suppresses NaCl sensitivity of sro7 mutant cells by restoring sodium pump (Ena1p) localization to the plasma membrane	GO:0000329,GO:0003674,GO:0006893,GO:0016020,GO:0016021
YOL011W	PLB3	chrXV	305349	307409	0	3024.31	-0.483887	0.174449	-2.77379	0.00554067	0.0891997	0.00262184	3164.16	2467.35	2905.44	2492.1	2182.79	4578.33	3380	2845.65	2337.44	3979.16	Phospholipase B (lysophospholipase) involved in lipid metabolism; hydrolyzes phosphatidylinositol and phosphatidylserine and displays transacylase activity in vitro; PLB3 has a paralog, PLB1, that arose from the whole genome duplication	GO:0004622,GO:0005576,GO:0005886,GO:0006660,GO:0046488
YGR004W	PEX31	chrVII	502938	504326	0	678.672	-0.482725	0.161544	-2.98819	0.00280637	0.0949614	0.00280637	599.096	604.925	606.63	615.367	636.608	943.333	744.745	603.55	625.988	844.039	Peroxisomal integral membrane protein; involved in negative regulation of peroxisome size; partially functionally redundant with Pex30p and Pex32p; probably acts at a step downstream of steps mediated by Pex28p and Pex29p; PEX31 has a paralog, PEX30, that arose from the whole genome duplication	GO:0003674,GO:0005779,GO:0007031,GO:0016021
YCL035C	GRX1	chrIII	60841	61173	1	6237.71	-0.376358	0.126324	-2.9793	0.00288904	0.0972332	0.00288904	5621.03	5384.56	6121.45	6062.71	5652.97	7662.35	7158.93	5709.01	5857.84	7410.64	Glutathione-dependent disulfide oxidoreductase; hydroperoxide and superoxide-radical responsive, heat-stable, with active site cysteine pair; protects cells from oxidative damage; GRX1 has a paralog, GRX2, that arose from the whole genome duplication; protein abundance increases in response to DNA replication stress	GO:0004364,GO:0004602,GO:0005634,GO:0005737,GO:0010731,GO:0015036,GO:0034599
YBL042C	FUI1	chrII	138341	140260	1	3746.64	-0.426351	0.143497	-2.97115	0.00296686	0.0993184	0.00296686	3729.52	3431.68	3699.77	2792.82	2842.07	5438.18	4292.44	3620.32	2817.44	4865.31	High affinity uridine permease, localizes to the plasma membrane; also mediates low but significant transport of the cytotoxic nucleoside analog 5-fluorouridine; not involved in uracil transport; relative distribution to the vacuole increases upon DNA replication stress	GO:0005886,GO:0015213,GO:0015862,GO:0016021,GO:0055085
YMR246W	FAA4	chrXIII	759807	761891	0	6966.55	0.48394	0.167866	2.88289	0.00394044	0.102464	0.00307719	7795.23	7677.46	6562.64	8761.79	7466.45	4449.53	6052.75	7345.11	8114.12	5251.14	Long chain fatty acyl-CoA synthetase; activates imported fatty acids with a preference for C12:0-C16:0 chain lengths; functions in long chain fatty acid import; important for survival during stationary phase; localized to lipid particles; involved in sphingolipid-to-glycerolipid metabolism; forms cytoplasmic foci upon DNA replication stress; FAA4 has a paralog, FAA1, that arose from the whole gen…	GO:0004467,GO:0005737,GO:0005811,GO:0015909,GO:0035336
YKR039W	GAP1	chrXI	515063	516871	0	718.186	-0.51865	0.175351	-2.95779	0.00309851	0.102628	0.00309851	688.669	648.537	697.576	477.072	571.436	1105.52	838.489	678.261	524.254	972.007	General amino acid permease; Gap1p senses the presence of amino acid substrates to regulate localization to the plasma membrane when needed; essential for invasive growth	GO:0000328,GO:0005768,GO:0005771,GO:0005886,GO:0005887,GO:0006865,GO:0015171,GO:0015193,GO:0015203,GO:0015846,GO:0016021,GO:0030134
YNL159C	ASI2	chrXIV	338478	339347	1	882.589	-0.500854	0.1704	-2.93928	0.00328974	0.108388	0.00328974	844.551	750.3	850.443	721.177	704.614	1323.77	983.272	815.098	712.895	1153.52	Subunit of the nuclear inner membrane Asi ubiquitin ligase complex; Asi complex targets both misfolded proteins and regulators of sterol biosynthesis for ubiquitin-mediated degradation; acts with Asi1p and Asi3p to ensure the fidelity of SPS-sensor signalling by targeting latent unprocessed forms of Stp1p and Stp2p and maintains the repressed state of gene expression in the absence of inducing am…	GO:0003674,GO:0005637,GO:0006511,GO:0036369,GO:0071230,GO:0097658
YMR009W	ADI1	chrXIII	284102	284641	0	2332.69	-0.46722	0.16061	-2.90903	0.0036255	0.118825	0.0036255	2294.01	1955.3	2617.12	1635.41	1500.85	2940.91	3385.21	2288.81	1568.13	3163.06	Acireductone dioxygenease involved in the methionine salvage pathway; ortholog of human MTCBP-1; transcribed as polycistronic mRNA with YMR010W and regulated post-transcriptionally by RNase III (Rnt1p) cleavage; ADI1 mRNA is induced in heat shock conditions	GO:0005634,GO:0005737,GO:0010308,GO:0019509
YLR154C	RNH203	chrXII	447982	448314	1	921.293	0.433995	0.150449	2.88466	0.00391836	0.119773	0.00367356	930.634	1048.32	1012.99	915.161	1064.48	752.52	724.955	997.313	989.819	738.737	Ribonuclease H2 subunit; required for RNase H2 activity; role in ribonucleotide excision repair; related to human AGS3 that causes Aicardi-Goutieres syndrome	GO:0004523,GO:0005634,GO:0005737,GO:0006401,GO:0032299,GO:0043137
YNR066C	YNR066C	chrXIV	753725	755035	1	69.9964	-1.17251	0.398077	-2.94542	0.00322512	0.120076	0.00372121	54.6748	46.8433	52.2457	54.7612	50.0597	165.769	65.6209	51.2546	52.4104	115.695	Putative membrane-localized protein of unknown function	GO:0003674,GO:0008150,GO:0016020,GO:0016021
YOL060C	MAM3	chrXV	214017	216137	1	1820.16	-0.550519	0.1718	-3.20443	0.00135331	0.120076	0.0037142	1680.96	1515.14	1631.23	1620.56	1579.24	2787.07	1926.96	1609.11	1599.9	2357.02	Protein required for normal mitochondrial morphology; has similarity to hemolysins	GO:0000329,GO:0003674,GO:0007005,GO:0016021,GO:0030026
YKL099C	UTP11	chrXI	255720	256472	1	1397.05	0.4084	0.129211	3.16073	0.00157374	0.12055	0.00375517	1456.44	1519.98	1421.28	1582.5	1589.63	1112.68	1096.81	1465.9	1586.07	1104.74	Subunit of U3-containing Small Subunit (SSU) processome complex; involved in production of 18S rRNA and assembly of small ribosomal subunit	GO:0000447,GO:0000472,GO:0000480,GO:0003674,GO:0005730,GO:0032040
YDR055W	PST1	chrIV	563527	564861	0	6365.23	-0.384452	0.13657	-2.81505	0.004877	0.121641	0.00380857	5718.75	5492.78	6122.42	5948.55	6188.51	8269.37	6816.24	5777.98	6068.53	7542.81	Cell wall protein that contains a putative GPI-attachment site; secreted by regenerating protoplasts; up-regulated by activation of the cell integrity pathway, as mediated by Rlm1p; upregulated by cell wall damage via disruption of FKS1; PST1 has a paralog, ECM33, that arose from the whole genome duplication	GO:0003674,GO:0005886,GO:0009277,GO:0031505
YDR321W	ASP1	chrIV	1108702	1109847	0	3153.64	0.366429	0.130571	2.80636	0.00501052	0.123149	0.00391284	3353.77	3340.41	3472.4	3198.42	3454.12	2438.83	2817.53	3388.86	3326.27	2628.18	Cytosolic L-asparaginase, involved in asparagine catabolism; catalyzes hydrolysis of L-asparagine to aspartic acid and ammonia, has an important role in therapy of acute lymphoblastic leukemia; synthesized constitutively	GO:0004067,GO:0005622,GO:0006530
YGR256W	GND2	chrVII	1004624	1006102	0	257.028	-0.583128	0.202237	-2.8834	0.00393413	0.123149	0.00391092	212.883	243.908	238.976	229.254	178.515	336.309	359.353	231.922	203.885	347.831	6-phosphogluconate dehydrogenase (decarboxylating); catalyzes an NADPH regenerating reaction in the pentose phosphate pathway; required for growth on D-glucono-delta-lactone; GND2 has a paralog, GND1, that arose from the whole genome duplication	GO:0004616,GO:0005829,GO:0005886,GO:0009051
YOR267C	HRK1	chrXV	822588	824867	1	1952.7	-0.452209	0.143623	-3.14858	0.00164064	0.123149	0.00391481	1794.96	1776.81	1519.96	2054.01	1878.66	2443.6	2200.9	1697.25	1966.33	2322.25	Protein kinase; implicated in activation of the plasma membrane H(+)-ATPase Pma1p in response to glucose metabolism; plays a role in ion homeostasis; protein abundance increases in response to DNA replication stress	GO:0004672,GO:0004674,GO:0005737,GO:0006468,GO:0006873
YDR535C	YDR535C	chrIV	1506606	1507362	1	47.1483	-1.10923	0.373478	-2.96999	0.0029781	0.123467	0.00394464	38.3887	37.1516	44.5056	23.2039	14.1678	88.2512	84.3697	40.0153	18.6859	86.3105	Dubious open reading frame; unlikely to encode a functional protein, based on available experimental and comparative sequence data; YDR535C is not an essential gene	GO:0003674,GO:0005575,GO:0008150
YLR327C	TMA10	chrXII	783127	783387	1	537.843	-0.697682	0.234945	-2.96955	0.00298236	0.125118	0.00401736	464.154	369.901	559.222	516.054	349.473	863.43	642.668	464.425	432.764	753.049	Protein of unknown function that associates with ribosomes; protein abundance increases in response to DNA replication stress; TMA10 has a paralog, STF2, that arose from the whole genome duplication	GO:0003674,GO:0005634,GO:0005737,GO:0005840,GO:0008150
YLR299W	ECM38	chrXII	726069	728051	0	1492.65	-0.455756	0.158883	-2.8685	0.00412419	0.127179	0.00412419	1394.79	1280.11	1588.65	1145.34	1140.98	2155	1743.64	1421.19	1143.16	1949.32	Gamma-glutamyltranspeptidase; major glutathione-degrading enzyme; involved in detoxification of electrophilic xenobiotics; expression induced mainly by nitrogen starvation	GO:0000324,GO:0003840,GO:0006751,GO:0006805
YPL233W	NSL1	chrXVI	106172	106822	0	594.139	-0.644031	0.212674	-3.02825	0.00245975	0.127179	0.00412343	575.83	499.123	502.139	587.522	352.307	834.808	807.241	525.697	469.915	821.025	Essential component of the MIND kinetochore complex; joins kinetochore subunits contacting DNA to those contacting microtubules; required for accurate chromosome segregation; complex consists of Mtw1p Including Nnf1p-Nsl1p-Dsn1p (MIND)	GO:0000776,GO:0000818,GO:0000922,GO:0003674,GO:0007059
YMR063W	RIM9	chrXIII	397077	397796	0	125.645	-0.815308	0.284418	-2.86658	0.0041493	0.127327	0.0041493	112.839	105.801	85.1411	116.948	102.008	218.243	138.533	101.261	109.478	178.388	Plasma membrane protein of unknown function; involved in the proteolytic activation of Rim101p in response to alkaline pH; interacts with Rim21p and Dfg16p to form a pH-sensing complex in the Rim101 pathway and is required to maintain Rim21p levels; has similarity to A. nidulans PalI;	GO:0003674,GO:0005886,GO:0016021,GO:0030437
YPL111W	CAR1	chrXVI	339944	340945	0	746.876	0.671059	0.22194	3.02361	0.00249777	0.127862	0.00418716	707.282	992.593	693.706	900.311	932.244	394.745	607.254	797.861	916.277	500.999	Arginase, catabolizes arginine to ornithine and urea; expression responds to both induction by arginine and nitrogen catabolite repression; disruption decreases production of carcinogen ethyl carbamate during wine fermentation and also enhances freeze tolerance	GO:0004053,GO:0005634,GO:0005737,GO:0005829,GO:0008270,GO:0019547,GO:0030145,GO:0043332,GO:0090368,GO:0090369
YDR293C	SSD1	chrIV	1045640	1049392	1	3549.99	-0.479398	0.183267	-2.61585	0.00890063	0.127989	0.00421178	3719.05	3257.22	2749.67	3576.18	2509.6	4453.11	4585.13	3241.98	3042.89	4519.12	Translational repressor with a role in polar growth and wall integrity; regulated by Cbk1p phosphorylation to effect bud-specific translational control and localization of specific mRNAs; interacts with TOR pathway components; contains a functional N-terminal nuclear localization sequence and nucleocytoplasmic shuttling appears to be critical to Ssd1p function	GO:0000900,GO:0000932,GO:0003729,GO:0003730,GO:0005634,GO:0005737,GO:0005933,GO:0005935,GO:0008298,GO:0010494,GO:0017148,GO:0048027,GO:0060237
YAL048C	GEM1	chrI	52801	54789	1	331.522	-0.671154	0.234772	-2.85875	0.00425317	0.128004	0.00425317	336.192	268.945	232.203	353.627	241.798	488.959	398.933	279.113	297.712	443.946	Outer mitochondrial membrane GTPase, subunit of the ERMES complex; potential regulatory subunit of the ERMES complex that links the ER to mitochondria and may promote inter-organellar calcium and phospholipid exchange as well as coordinating mitochondrial DNA replication and growth; cells lacking Gem1p contain collapsed, globular, or grape-like mitochondria; ortholog of metazoan Miro GTPases	GO:0000001,GO:0003924,GO:0005509,GO:0005739,GO:0005741,GO:0010821,GO:0032865,GO:0055091,GO:1990456
YHR139C	SPS100	chrVIII	378219	379199	1	108.551	-0.943606	0.324933	-2.904	0.00368424	0.128004	0.00425096	76.7773	64.6114	118.036	71.468	96.3413	192.006	140.616	86.4751	83.9046	166.311	Protein required for spore wall maturation; expressed during sporulation; may be a component of the spore wall; expression also induced in cells treated with the mycotoxin patulin; SPS100 has a paralog, YGP1, that arose from the whole genome duplication	GO:0003674,GO:0005619,GO:0030476
YDR481C	PHO8	chrIV	1418550	1420250	1	3428.06	-0.502499	0.181551	-2.76782	0.00564325	0.128504	0.0042903	2933.82	3003.62	3544	2455.9	3102.76	5212.78	3743.52	3160.48	2779.33	4478.15	Repressible vacuolar alkaline phosphatase; regulated by levels of Pi and by Pho4p, Pho9p, Pho80p, Pho81p and Pho85p; dephosphorylates phosphotyrosyl peptides; contributes to NAD+ metabolism by producing nicotinamide riboside from NMN	GO:0000329,GO:0004035,GO:0006470,GO:0046496
YBR056W	YBR056W	chrII	347879	349384	0	3858.77	-0.411786	0.149326	-2.75764	0.0058221	0.13132	0.00442627	3823.74	3188.57	4164.17	2889.35	3035.7	4747.67	5162.18	3725.5	2962.52	4954.93	Putative glycoside hydrolase of the mitochondrial intermembrane space	GO:0003674,GO:0005737,GO:0005758,GO:0008150
YDR418W	RPL12B	chrIV	1301616	1302113	0	8382.35	0.386995	0.148865	2.59963	0.00933254	0.13132	0.00441616	9324.96	9985.7	9078.17	7210.84	8604.6	6451.88	8020.33	9462.94	7907.72	7236.1	Ribosomal 60S subunit protein L12B; rpl12a rpl12b double mutant exhibits slow growth and slow translation; homologous to mammalian ribosomal protein L12 and bacterial L11; RPL12B has a paralog, RPL12A, that arose from the whole genome duplication	GO:0000027,GO:0002181,GO:0003735,GO:0022625,GO:0030687
YGR254W	ENO1	chrVII	1000927	1002240	0	48651.3	-0.41482	0.150602	-2.7544	0.00587992	0.134416	0.00459177	50796.3	48359.2	46876	31532.2	33211.3	55241.7	74542.2	48677.2	32371.8	64891.9	Enolase I, a phosphopyruvate hydratase; catalyzes conversion of 2-phosphoglycerate to phosphoenolpyruvate during glycolysis and the reverse reaction during gluconeogenesis; expression repressed in response to glucose; protein abundance increases in response to DNA replication stress; N-terminally propionylated in vivo; ENO1 has a paralog, ENO2, that arose from the whole genome duplication	GO:0000015,GO:0000324,GO:0004634,GO:0005737,GO:0005739,GO:0005886,GO:0006094,GO:0006096,GO:0032889
YKR049C	FMP46	chrXI	526830	527231	1	675.126	-0.45861	0.166534	-2.75385	0.00588986	0.134416	0.00459504	552.564	617.039	606.63	581.953	739.561	790.683	837.448	592.078	660.757	814.065	Putative redox protein containing a thioredoxin fold; the authentic, non-tagged protein is detected in highly purified mitochondria in high-throughput studies	GO:0003674,GO:0005739,GO:0008150
YMR217W	GUA1	chrXIII	701790	703367	0	7937.33	0.411938	0.14527	2.83566	0.0045731	0.134416	0.0045731	8506	8982.61	7887.16	8534.39	8937.07	5596.79	7117.26	8458.59	8735.73	6357.03	GMP synthase; highly conserved enzyme that catalyzes the second step in the biosynthesis of GMP from inosine 5'-phosphate (IMP); transcription is not subject to regulation by guanine but is negatively regulated by nutrient starvation; reduction-of-function mutation gua1-G388D causes changes in cellular guanine nucleotide pools, defects in general protein synthesis, and impaired translation of GCN…	GO:0003922,GO:0005575,GO:0006177
YLR107W	REX3	chrXII	364116	365330	0	1526.96	-0.57622	0.203439	-2.8324	0.00462003	0.134518	0.00462003	1437.83	1151.7	1741.52	1091.51	961.524	2506.81	1797.8	1443.68	1026.52	2152.31	RNA exonuclease; required for maturation of the RNA component of RNase MRP; functions redundantly with Rnh70p and Rex2p in processing of U5 snRNA and RNase P RNA; member of RNase D family of exonucleases	GO:0000175,GO:0000467,GO:0005634,GO:0005737,GO:0008408,GO:0034476,GO:0043628
YGL008C	PMA1	chrVII	479910	482666	1	94339.2	-0.417371	0.151789	-2.74967	0.00596544	0.134778	0.00465856	91259.2	83902	83806.9	81609	89230	132061	98506.4	86322.7	85419.5	115284	Plasma membrane P2-type H+-ATPase; pumps protons out of cell; major regulator of cytoplasmic pH and plasma membrane potential; long-lived protein asymmetrically distributed at plasma membrane between mother cells and buds; accumulates at high levels in mother cells during aging, buds emerge with very low levels of Pma1p, newborn cells have low levels of Pma1p; Hsp30p plays a role in Pma1p regulat…	GO:0005739,GO:0005886,GO:0006885,GO:0008553,GO:0015992,GO:0016021,GO:0045121,GO:0055085,GO:1902906
YOL155C	HPF1	chrXV	28703	31606	1	2654.15	-0.434887	0.163337	-2.66251	0.00775598	0.134778	0.00467202	2339.38	2445.54	1956.31	3248.54	2513.38	3128.15	2947.73	2247.08	2880.96	3037.94	Haze-protective mannoprotein; reduces the particle size of aggregated proteins in white wines	GO:0005576,GO:0009277,GO:0015926,GO:0031505
YMR034C	YMR034C	chrXIII	339418	340722	1	650.398	-0.591531	0.215611	-2.74351	0.00607855	0.136176	0.00474224	615.382	490.239	828.19	334.136	342.862	1048.28	893.694	644.604	338.499	970.988	Putative transporter; member of the SLC10 carrier family; identified in a transposon mutagenesis screen as a gene involved in azole resistance; YMR034C is not an essential gene	GO:0008150,GO:0015248,GO:0016021
YOR004W	UTP23	chrXV	333592	334356	0	1091.31	0.431016	0.139561	3.08836	0.00201262	0.137274	0.00480241	1074.88	1100.01	1136.83	1279.93	1410.17	789.49	847.864	1103.91	1345.05	818.677	Component of the small subunit processome; involved in 40S ribosomal subunit biogenesis; interacts with snR30 and is required for dissociation of snR30 from large pre-ribosomal particles; has homology to PINc domain protein Fcf1p, although the PINc domain of Utp23p is not required for function; essential protein	GO:0000447,GO:0000472,GO:0000480,GO:0005730,GO:0005739,GO:0032040,GO:0070181
YCR061W	YCR061W	chrIII	225563	227458	0	1318.92	-0.429507	0.147726	-2.90746	0.00364373	0.138404	0.00490825	1280.79	1087.9	1279.05	1152.77	1157.98	1745.94	1528.03	1215.91	1155.38	1636.99	Protein of unknown function; green fluorescent protein (GFP)-fusion protein localizes to the cytoplasm in a punctate pattern; induced by treatment with 8-methoxypsoralen and UVA irradiation	GO:0003674,GO:0005737,GO:0008361,GO:0016021
YOR220W	RCN2	chrXV	755328	756125	0	4013.6	-0.415028	0.156787	-2.64709	0.00811886	0.138404	0.00489061	4337.92	3514.06	4408.95	2706.5	2231.91	5188.93	5706.94	4086.98	2469.2	5447.93	Protein of unknown function; green fluorescent protein (GFP)-fusion protein localizes to the cytoplasm; phosphorylated in response to alpha factor; protein abundance increases in response to DNA replication stress	GO:0003674,GO:0005737,GO:0008150
YPR026W	ATH1	chrXVI	615379	619014	0	749.715	-0.496311	0.176366	-2.8141	0.00489141	0.138404	0.00489141	739.854	578.272	697.576	669.2	668.722	1059.01	835.365	671.901	668.961	947.189	Acid trehalase required for utilization of extracellular trehalose; involved in intracellular trehalose degradation during growth recovery after saline stress	GO:0000324,GO:0004555,GO:0005993,GO:0009277,GO:0030287,GO:0071361,GO:0071465,GO:0071497
YLR185W	RPL37A	chrXII	522663	523288	0	19912.5	0.352896	0.133811	2.63726	0.00835781	0.141329	0.00503455	21760.6	21802.3	23195.1	16939.8	20841.8	17197.1	17651	22252.7	18890.8	17424	Ribosomal 60S subunit protein L37A; homologous to mammalian ribosomal protein L37, no bacterial homolog; RPL37A has a paralog, RPL37B, that arose from the whole genome duplication	GO:0002181,GO:0003735,GO:0022625
YGL166W	CUP2	chrVII	191129	191806	0	830.235	-0.43785	0.157862	-2.77362	0.00554358	0.144599	0.00519724	838.734	759.185	802.068	689.619	555.379	1128.18	1038.48	799.995	622.499	1083.33	Copper-binding transcription factor; activates transcription of the metallothionein genes CUP1-1 and CUP1-2 in response to elevated copper concentrations; required for regulation of copper genes in response to DNA-damaging reagents; CUP2 has a paralog, HAA1, that arose from the whole genome duplication	GO:0000978,GO:0001202,GO:0005507,GO:0005634,GO:0006357,GO:0046688
YML100W	TSL1	chrXIII	70624	73920	0	3891.8	-0.374908	0.138103	-2.71469	0.00663378	0.144599	0.00518048	3792.33	3392.1	3369.84	4086.67	3479.62	4374.4	4747.62	3518.09	3783.14	4561.01	Large subunit of trehalose 6-phosphate synthase/phosphatase complex; Tps1p-Tps2p complex converts uridine-5'-diphosphoglucose and glucose 6-phosphate to trehalose; contributes to survival to acute lethal heat stress; mutant has aneuploidy tolerance; protein abundance increases in response to DNA replication stress; TSL1 has a paralog, TPS3, that arose from the whole genome duplication	GO:0003825,GO:0004805,GO:0005737,GO:0005946,GO:0005992,GO:0030234
YGR126W	YGR126W	chrVII	745835	746527	0	106.491	-0.735451	0.264154	-2.78417	0.00536651	0.14712	0.00533485	79.1039	96.1095	81.271	103.953	99.1749	151.458	134.367	85.4948	101.564	142.912	Putative protein of unknown function; green fluorescent protein (GFP)-fusion protein localizes to both the cytoplasm and the nucleus and is induced in response to the DNA-damaging agent MMS	GO:0003674,GO:0005634,GO:0005737,GO:0008150
YJL171C	YJL171C	chrX	99704	100894	1	2684.67	-0.549279	0.20975	-2.61873	0.00882572	0.14712	0.00531641	2504.57	2032.84	3256.65	1456.28	1939.11	4225.32	3377.91	2598.02	1697.69	3801.62	GPI-anchored cell wall protein of unknown function; induced in response to cell wall damaging agents and by mutations in genes involved in cell wall biogenesis; sequence similarity to YBR162C/TOS1, a covalently bound cell wall protein; protein abundance increases in response to DNA replication stress	GO:0003674,GO:0005739,GO:0005886,GO:0008150,GO:0009277
YNL010W	YNL010W	chrXIV	613635	614360	0	4939.58	0.36062	0.14261	2.52872	0.0114479	0.148734	0.00541714	5222.02	5557.39	5476.12	4529.4	5352.61	3837.73	4601.8	5418.51	4941	4219.76	Putative protein of unknown function; similar to phosphoserine phosphatases; green fluorescent protein (GFP)-fusion protein localizes to the cytoplasm and nucleus; homozygous diploid mutant shows an increase in glycogen accumulation	GO:0003674,GO:0005634,GO:0005737,GO:0008150
YHR137W	ARO9	chrVIII	375709	377250	0	2564.48	0.503725	0.181438	2.77629	0.00549827	0.149001	0.00549827	2869.84	3006.86	2597.77	2653.6	2840.18	1580.17	2402.98	2824.82	2746.89	1991.57	Aromatic aminotransferase II; catalyzes the first step of tryptophan, phenylalanine, and tyrosine catabolism	GO:0005634,GO:0005737,GO:0008793,GO:0009072
YJL009W	YJL009W	chrX	419855	420181	0	519.275	0.674091	0.249999	2.69638	0.00700984	0.149001	0.0054688	549.074	620.27	667.583	358.268	672.5	333.923	433.306	612.309	515.384	383.615	Dubious open reading frame; unlikely to encode a functional protein, based on available experimental and comparative sequence data; partially overlaps CCT8/YJL008C, a verified gene encoding a subunit of the cytosolic chaperonin Cct ring complex	GO:0003674,GO:0005575,GO:0008150
YNL172W	APC1	chrXIV	310636	315882	0	676.98	-0.472585	0.164537	-2.8722	0.0040762	0.149001	0.00549079	629.341	593.618	592.117	695.188	549.712	878.934	799.95	605.026	622.45	839.442	Largest subunit of the Anaphase-Promoting Complex/Cyclosome; APC/C is a ubiquitin-protein ligase required for degradation of anaphase inhibitors, including mitotic cyclins, during the metaphase/anaphase transition; component of the platform domain of the APC/C, based on structural analysis; localizes to nuclear foci that become diffuse upon DNA replication stress	GO:0004842,GO:0005634,GO:0005680,GO:0007091,GO:0008054,GO:0010458,GO:0016567,GO:0031145
YOR035C	SHE4	chrXV	397735	400104	1	1154.42	-0.455666	0.152842	-2.98129	0.00287035	0.149173	0.00552845	1151.66	1116.16	987.83	1012.62	836.847	1456.14	1519.7	1085.22	924.732	1487.92	Protein containing a UCS (UNC-45/CRO1/SHE4) domain; binds to myosin motor domains to regulate myosin function; involved in endocytosis, polarization of the actin cytoskeleton, and asymmetric mRNA localization	GO:0005737,GO:0007533,GO:0008298,GO:0017022,GO:0030036
YGR149W	YGR149W	chrVII	789031	790329	0	1039.34	-0.563867	0.19665	-2.86736	0.00413914	0.149799	0.00557557	942.267	818.95	1042.01	879.891	829.291	1667.23	1095.77	934.409	854.591	1381.5	Putative protein of unknown function; predicted to be an integal membrane protein	GO:0003674,GO:0008150,GO:0016021
YDR483W	KRE2	chrIV	1421157	1422485	0	10164.8	-0.54138	0.215603	-2.511	0.012039	0.152403	0.00569684	9409.88	8183.04	10822.6	6681.79	8485.59	17364	10206.7	9471.84	7583.69	13785.3	Alpha1,2-mannosyltransferase of the Golgi; involved in protein mannosylation; KRE2 has a paralog, KTR6, that arose from the whole genome duplication	GO:0000026,GO:0000032,GO:0005794,GO:0006491,GO:0006493
YDR029W	YDR029W	chrIV	501100	501414	0	44.0544	-1.3588	0.493152	-2.75533	0.00586333	0.153311	0.00582874	25.5924	41.9974	18.3827	42.6951	31.1693	103.755	44.7889	28.6575	36.9322	74.2718	Dubious open reading frame; unlikely to encode a functional protein, based on available experimental and comparative sequence data	GO:0003674,GO:0005575,GO:0008150
YER001W	MNN1	chrV	153520	155808	0	3852.89	-0.404786	0.151752	-2.66741	0.00764378	0.153311	0.00581121	3545.72	3350.1	3768.46	3397.98	3494.73	5349.93	4063.29	3554.76	3446.36	4706.61	Alpha-1,3-mannosyltransferase; integral membrane glycoprotein of the Golgi complex, required for addition of alpha1,3-mannose linkages to N-linked and O-linked oligosaccharides, one of five S. cerevisiae proteins of the MNN1 family	GO:0000033,GO:0005794,GO:0006491,GO:0006493
YLR058C	SHM2	chrXII	257992	259401	1	15685.2	-0.358093	0.134289	-2.66657	0.00766288	0.153311	0.00582573	16973.6	15175.6	14437.2	11875.7	11529.8	18461.2	21343.5	15528.8	11702.8	19902.3	Cytosolic serine hydroxymethyltransferase; converts serine to glycine plus 5,10 methylenetetrahydrofolate; major isoform involved in generating precursors for purine, pyrimidine, amino acid, and lipid biosynthesis	GO:0004372,GO:0005737,GO:0005886,GO:0006730,GO:0043332
YMR189W	GCV2	chrXIII	637500	640604	0	5750.62	-0.371786	0.143524	-2.5904	0.00958643	0.153311	0.00577464	5930.47	5491.17	5131.68	5148.48	4274.91	6716.63	7560.99	5517.77	4711.69	7138.81	P subunit of the mitochondrial glycine decarboxylase complex; glycine decarboxylase is required for the catabolism of glycine to 5,10-methylene-THF; expression is regulated by levels of 5,10-methylene-THF in the cytoplasm	GO:0004375,GO:0005739,GO:0005960,GO:0006730,GO:0019464
YPR123C	YPR123C	chrXVI	786141	786575	1	149.323	-0.750012	0.268175	-2.79672	0.00516242	0.156016	0.00595651	140.758	130.838	103.524	108.594	140.734	246.865	173.947	125.04	124.664	210.406	Dubious open reading frame; unlikely to encode a functional protein, based on available experimental and comparative sequence data; partially/completely overlaps the verified ORF CTR	GO:0003674,GO:0008150,GO:0016021
YDR090C	YDR090C	chrIV	625066	625998	1	803.52	-0.571919	0.201321	-2.84084	0.0044995	0.156917	0.00606099	666.567	720.418	803.035	622.792	639.442	1329.73	842.656	730.007	631.117	1086.19	Putative protein of unknown function	GO:0003674,GO:0008150,GO:0016021
YJL133C-A	YJL133C-A	chrX	159623	159847	1	620.937	0.529558	0.192975	2.74419	0.00606612	0.156917	0.00606612	482.767	642.076	617.273	823.274	974.748	446.026	360.394	580.705	899.011	403.21	Putative protein of unknown function; the authentic, non-tagged protein is detected in highly purified mitochondria in high-throughput studies	GO:0003674,GO:0005739,GO:0008150
YLR248W	RCK2	chrXII	634252	636084	0	4449.65	-0.432386	0.167986	-2.57394	0.0100549	0.156917	0.00605681	4243.69	3924.34	4433.14	3180.79	4028.39	6469.76	4867.41	4200.39	3604.59	5668.58	Protein kinase involved in response to oxidative and osmotic stress; identified as suppressor of S. pombe cell cycle checkpoint mutations; similar to CaM (calmodulin) kinases; RCK2 has a paralog, RCK1, that arose from the whole genome duplication	GO:0004672,GO:0004674,GO:0005737,GO:0006468,GO:0007231,GO:0034599,GO:0040020
YJL012C	VTC4	chrX	411234	413399	1	4884.02	-0.397994	0.160241	-2.48372	0.0130016	0.158493	0.00615238	4762.52	4789.32	3993.89	4597.15	4147.4	5163.89	6733.96	4515.24	4372.28	5948.92	Vacuolar membrane polyphosphate polymerase; subunit of the vacuolar transporter chaperone (VTC) complex involved in synthesis and transfer of polyP to the vacuole; regulates membrane trafficking; role in non-autophagic vacuolar fusion; protein abundance increases in response to DNA replication stress	GO:0005783,GO:0006797,GO:0007034,GO:0008976,GO:0016021,GO:0016237,GO:0031310,GO:0033254,GO:0042144
YDL238C	GUD1	chrIV	28985	30454	1	254.256	-0.535545	0.195737	-2.73604	0.0062183	0.158594	0.00618161	246.618	222.102	216.723	230.183	203.072	310.072	351.02	228.481	216.627	330.546	Guanine deaminase; a catabolic enzyme of the guanine salvage pathway producing xanthine and ammonia from guanine; activity is low in exponentially-growing cultures but expression is increased in post-diauxic and stationary-phase cultures	GO:0005737,GO:0008892,GO:0016811,GO:0046098
YJR008W	YJR008W	chrX	452430	453446	0	777.397	-0.556836	0.192063	-2.89924	0.00374064	0.160222	0.00627065	629.341	603.309	789.49	619.08	817.012	1080.48	903.069	674.047	718.046	991.775	Protein of unknown function; inhibits haploid invasive growth when overexpressed; synthetically lethal with phospholipase C (PLC1); expression induced by mild heat-stress on a non-fermentable carbon source, upon entry into stationary phase and upon nitrogen deprivation; repressed by inosine and choline in an Opi1p-dependent manner; highly conserved from bacteria to human; Memo, the human homolog,…	GO:0003674,GO:0005634,GO:0005737,GO:0008150
YAL018C	LDS1	chrI	118564	119541	1	4.99401	5.01508	1.83803	2.72851	0.00636206	0.160347	0.00632452	5.81646	1.61529	12.5777	9.28155	5.66714	0	0	6.6698	7.47434	0	Protein Involved in spore wall assembly; localizes to lipid droplets found on or outside of the prospore membrane; shares similarity with Lds2p and Rrt8p, and a strain mutant for all 3 genes exhibits reduced dityrosine fluorescence relative to the single mutants	GO:0003674,GO:0005619,GO:0005628,GO:0005811,GO:0016021,GO:0030476
YOR099W	KTR1	chrXV	511825	513006	0	7869.67	-0.495703	0.193724	-2.55881	0.010503	0.160347	0.00632678	6926.25	6987.73	8292.55	5332.25	6673.05	12671.2	8204.7	7402.17	6002.65	10437.9	Alpha-1,2-mannosyltransferase; involved in O- and N-linked protein glycosylation; type II membrane protein; member of the KRE2/MNT1 mannosyltransferase family; relocalizes from vacuole to cytoplasm upon DNA replication stress	GO:0000026,GO:0000329,GO:0005794,GO:0006487,GO:0006493
YBR184W	YBR184W	chrII	597363	598934	0	217.693	0.646636	0.229341	2.81954	0.00480921	0.160792	0.00637003	190.78	219.679	228.333	296.082	317.36	113.295	158.323	212.931	306.721	135.809	Putative protein of unknown function; YBR184W is not an essential gene	GO:0003674,GO:0005575,GO:0008150
YLR022C	SDO1	chrXII	184174	184926	1	1535.49	0.353485	0.129682	2.72579	0.00641477	0.16088	0.00641477	1525.08	1645.98	1655.41	1692.96	1709.59	1282.03	1237.42	1608.82	1701.27	1259.73	Guanine nucleotide exchange factor (GEF) for Ria1p; essential protein involved in ribosome maturation; with Ria1p, promotes release of Tif6p from 60S ribosomal subunits in the cytoplasm so that they can assemble with 40S subunits to generate mature ribosomes; ortholog of the human protein (SBDS) responsible for autosomal recessive Shwachman-Bodian-Diamond Syndrome; highly conserved across archaea…	GO:0005085,GO:0005634,GO:0005737,GO:0005844,GO:0030687,GO:0042256
YLR138W	NHA1	chrXII	418437	421394	0	2984.99	-0.445307	0.169094	-2.6335	0.00845104	0.16088	0.00642493	2808.19	2706.41	2932.53	2497.67	2281.02	4531.82	3137.3	2815.71	2389.34	3834.56	Na+/H+ antiporter; involved in sodium and potassium efflux through the plasma membrane; required for alkali cation tolerance at acidic pH	GO:0005886,GO:0006970,GO:0015385,GO:0015491,GO:0016021,GO:0030004,GO:0030007,GO:0036376,GO:0045121,GO:0097623
YGL178W	MPT5	chrVII	167352	170571	0	870.161	-0.636201	0.235691	-2.6993	0.00694851	0.160914	0.0065144	906.205	683.266	642.428	992.198	556.324	1130.57	1180.13	743.966	774.261	1155.35	mRNA-binding protein of the PUF family; binds to the 3' UTR of specific mRNAs, including those involved in mating type switching, cell wall integrity, chronological lifespan, chromatin modification, and spindle pole body architecture; recruits the CCR4-NOT deadenylase complex to mRNAs along with Dhh1p and Dcp1p to promote deadenylation, decapping, and decay; also interacts with the Caf20p transla…	GO:0003729,GO:0005737,GO:0017148,GO:0030674,GO:0045947,GO:1900153,GO:1902416
YIL169C	YIL169C	chrIX	23119	26106	1	2784.1	-0.430323	0.15821	-2.71996	0.00652908	0.160914	0.00652908	2378.93	2489.16	1921.48	3578.04	3021.53	2961.18	3138.35	2263.19	3299.78	3049.77	Putative protein of unknown function; serine/threonine rich and highly similar to YOL155C, a putative glucan alpha-1,4-glucosidase; transcript is induced in both high and low pH environments; YIL169C is a non-essential gene	GO:0003674,GO:0005575,GO:0008150
YJL077C	ICS3	chrX	294666	295061	1	381.858	0.655521	0.236585	2.77076	0.00559255	0.160914	0.0064528	449.031	478.932	465.373	245.961	443.926	289.798	299.981	464.446	344.943	294.89	Protein with a role in processing of secretory proteins; possible role in vacuolar sorting, null mutants are hypersensitive to sortin2	GO:0003674,GO:0005575,GO:0008150
YLR286C	CTS1	chrXII	708448	710136	1	35336.7	-0.395701	0.155192	-2.54975	0.0107799	0.160914	0.00649358	34380	30503.9	36858.3	27833.5	28547.3	50777.8	38455.9	33914.1	28190.4	44616.9	Endochitinase; required for cell separation after mitosis; transcriptional activation during the G1 phase of the cell cycle is mediated by transcription factor Ace2p	GO:0005576,GO:0005635,GO:0005783,GO:0005935,GO:0006032,GO:0007109,GO:0008843,GO:0009277
YJR137C	MET5	chrX	678957	683285	1	1881.54	-0.400057	0.136856	-2.92321	0.00346444	0.163277	0.0066727	1933.39	1778.43	1674.76	1551.88	1494.24	2499.65	2238.4	1795.53	1523.06	2369.03	Sulfite reductase beta subunit; involved in amino acid biosynthesis, transcription repressed by methionine	GO:0000097,GO:0000103,GO:0004783,GO:0005737,GO:0009337
YOR396W	YRF1-8	chrXV	1085473	1090863	0	3738.55	-0.321921	0.131159	-2.45444	0.0141106	0.163277	0.00667713	3500.35	3376.76	3329.21	3917.74	3540.07	4549.71	3956	3402.1	3728.91	4252.85	One of several telomeric Y' element-encoded DNA helicases; known as Y'-Help1 (Y'-HELicase Protein 1)	GO:0004386,GO:0005575,GO:0008150
YKR076W	ECM4	chrXI	582283	583395	0	666.371	-0.479901	0.166739	-2.87816	0.00399997	0.16333	0.00670539	609.565	581.503	560.19	683.122	603.55	721.513	905.152	583.753	643.336	813.332	Omega class glutathione transferase; not essential; similar to Ygr154cp; green fluorescent protein (GFP)-fusion protein localizes to the cytoplasm	GO:0004364,GO:0005737,GO:0006749
YOR008C	SLG1	chrXV	341278	342414	1	2314.2	-0.408893	0.155717	-2.62588	0.00864263	0.163761	0.00674924	2155.58	2090.18	2105.31	2152.39	2073.23	3234.29	2388.39	2117.02	2112.81	2811.34	Sensor-transducer of the stress-activated PKC1-MPK1 kinase pathway; involved in maintenance of cell wall integrity; required for mitophagy; involved in organization of the actin cytoskeleton; secretory pathway Wsc1p is required for the arrest of secretion response	GO:0004888,GO:0005886,GO:0005935,GO:0006970,GO:0007266,GO:0009408,GO:0030010,GO:0030036,GO:0030242,GO:0031505,GO:0043332,GO:0045807
YPR071W	YPR071W	chrXVI	688172	688807	0	432.397	-0.56636	0.202673	-2.79446	0.0051987	0.166432	0.00688593	396.683	394.13	356.044	349.915	396.7	675.002	458.305	382.286	373.307	566.653	Putative membrane protein; YPR071W is not an essential gene; YPR071W has a paralog, YIL029C, that arose from a single-locus duplication	GO:0003674,GO:0008150,GO:0016021
YGL053W	PRM8	chrVII	402589	403302	0	1328.49	-0.554767	0.186386	-2.97645	0.00291608	0.167532	0.0069582	1197.03	1009.55	1423.21	1145.34	970.025	1985.65	1568.65	1209.93	1057.68	1777.15	Pheromone-regulated protein; contains with 2 predicted transmembrane segments and an FF sequence, a motif involved in COPII binding; forms a complex with Prp9p in the ER; member of DUP240 gene family; PRM8 has a paralog, PRM9, that arose from a segmental duplication	GO:0003674,GO:0005783,GO:0005886,GO:0008150,GO:0016021
YAR027W	UIP3	chrI	183770	184477	0	3622.28	-0.571197	0.234415	-2.4367	0.0148221	0.168224	0.00701382	3259.55	2974.55	4225.13	1851.67	2684.33	6482.88	3877.88	3486.41	2268	5180.38	Putative integral membrane protein of unknown function; interacts with Ulp1p at the nuclear periphery; member of DUP240 gene family	GO:0003674,GO:0005635,GO:0008150
YKL212W	SAC1	chrXI	34543	36414	0	4324.25	-0.351477	0.144901	-2.42564	0.0152816	0.172465	0.00723126	4462.39	3943.72	4065.49	3984.57	3207.6	5079.21	5526.74	4157.2	3596.08	5302.98	Phosphatidylinositol phosphate (PtdInsP) phosphatase; involved in hydrolysis of PtdIns[4]P in the early and medial Golgi; regulated by interaction with Vps74p; ER localized transmembrane protein which cycles through the Golgi; involved in protein trafficking and processing, secretion, and cell wall maintenance; regulates sphingolipid biosynthesis through the modulation of PtdIns(4)P metabolism	GO:0004438,GO:0005739,GO:0005741,GO:0005797,GO:0016791,GO:0030173,GO:0030176,GO:0035339,GO:0043812,GO:0043813,GO:0046856
YPL258C	THI21	chrXVI	53498	55153	1	784.039	0.396617	0.148897	2.6637	0.00772859	0.172465	0.00724574	796.856	891.638	848.508	802.854	863.294	615.373	669.75	845.667	833.074	642.561	Hydroxymethylpyrimidine (HMP) and HMP-phosphate kinase; involved in thiamine biosynthesis; member of a gene family with THI20 and THI22; functionally redundant with Thi20p	GO:0005575,GO:0008902,GO:0008972,GO:0009228
YJL066C	MPM1	chrX	314114	314872	1	687.086	-0.441374	0.169879	-2.59817	0.0093722	0.172888	0.00731183	702.629	611.386	547.612	628.361	636.608	771.601	911.402	620.542	632.485	841.502	Mitochondrial intermembrane space protein of unknown function	GO:0003674,GO:0005739,GO:0005758,GO:0008150,GO:0019898
YNR050C	LYS9	chrXIV	714048	715388	1	32916.8	0.402829	0.150198	2.68198	0.00731876	0.172888	0.00731876	34397.4	36117.8	34185.1	36058.8	36864.7	22395.5	30398.1	34900.1	36461.8	26396.8	Saccharopine dehydrogenase (NADP+, L-glutamate-forming); catalyzes the formation of saccharopine from alpha-aminoadipate 6-semialdehyde, the seventh step in lysine biosynthesis pathway; exhibits genetic and physical interactions with TRM112	GO:0004755,GO:0005737,GO:0019878
YDR053W	YDR053W	chrIV	560249	560644	0	7.44985	-2.55032	0.953958	-2.67341	0.00750842	0.17566	0.00746413	3.48988	4.03822	0.967512	5.56893	4.72261	16.6962	16.6656	2.83187	5.14577	16.6809	Putative protein of unknown function; open reading frame overlaps 5' end of essential DBF4 gene encoding the regulatory subunit of the Cdc7p-Dbf4p kinase complex	GO:0003674,GO:0008150,GO:0016021
YLR173W	YLR173W	chrXII	502421	504247	0	748.1	-0.518022	0.195332	-2.652	0.00800157	0.175882	0.00750167	697.976	684.881	679.194	617.223	587.493	1203.32	766.619	687.35	602.358	984.968	Putative protein of unknown function	GO:0000329,GO:0003674,GO:0008150
YDL075W	RPL31A	chrIV	322226	322988	0	30556.5	0.284979	0.118473	2.40543	0.0161534	0.178546	0.00764381	32809.5	32556.1	32456.2	31127.5	31422.4	25052.6	28471.1	32607.3	31275	26761.9	Ribosomal 60S subunit protein L31A; associates with karyopherin Sxm1p; loss of both Rpl31p and Rpl39p confers lethality; homologous to mammalian ribosomal protein L31, no bacterial homolog; RPL31A has a paralog, RPL31B, that arose from the whole genome duplication	GO:0002181,GO:0003735,GO:0006450,GO:0022625
YBL077W	YBL077W	chrII	80897	81328	0	607.454	0.793889	0.287742	2.75903	0.00579725	0.181729	0.00780912	620.035	727.686	870.761	355.483	824.568	473.456	380.185	739.494	590.026	426.82	Dubious open reading frame; unlikely to encode a functional protein, based on available experimental and comparative sequence data; partially overlaps the verified gene ILS1/YBL076C	GO:0003674,GO:0005575,GO:0008150
YBR126C	TPS1	chrII	488905	490392	1	7569.18	-0.354615	0.142873	-2.48204	0.0130634	0.182446	0.0078691	7436.93	6818.93	6903.2	6999.22	6792.06	7919.95	10114	7053.02	6895.64	9016.95	Synthase subunit of trehalose-6-P synthase/phosphatase complex; synthesizes the storage carbohydrate trehalose; also found in a monomeric form; expression is induced by the stress response and repressed by the Ras-cAMP pathway; protein abundance increases in response to DNA replication stress and in response to prolonged exposure to boric acid	GO:0003825,GO:0005737,GO:0005946,GO:0005992,GO:0034599,GO:0034605,GO:0044262
YBR252W	DUT1	chrII	722611	723054	0	2527.83	0.412886	0.172683	2.39101	0.0168022	0.18337	0.0079508	2249.81	2679.76	3077.66	2508.8	3167.93	2087.02	1923.84	2669.07	2838.37	2005.43	deoxyuridine triphosphate diphosphatase (dUTPase); catalyzes hydrolysis of dUTP to dUMP and PPi, thereby preventing incorporation of uracil into DNA during replication; critical for the maintenance of genetic stability; also has diphosphatase activity on deoxyinosine triphosphate	GO:0004170,GO:0005634,GO:0005737,GO:0009213,GO:0035863,GO:0035870,GO:0046081
YNL115C	YNL115C	chrXIV	410119	412053	1	1643.22	-0.554701	0.193441	-2.86754	0.00413671	0.18337	0.00796753	1484.36	1356.84	1670.89	1282.71	1288.33	2697.62	1721.77	1504.03	1285.52	2209.7	Putative protein of unknown function; green fluorescent protein (GFP)-fusion protein localizes to mitochondria; YNL115C is not an essential gene	GO:0000324,GO:0003674,GO:0008150,GO:0016021
YOL067C	RTG1	chrXV	201985	202518	1	325.963	-0.781941	0.284963	-2.74401	0.00606932	0.18434	0.0080391	319.906	278.637	199.308	372.19	197.405	524.737	389.559	265.95	284.798	457.148	Transcription factor (bHLH) involved in interorganelle communication; contributes to communication between mitochondria, peroxisomes, and nucleus; target of Hog1p; activated in stochastic pulses of nuclear localization	GO:0000981,GO:0005634,GO:0005737,GO:0031930,GO:0045944,GO:0071400
YKL197C	PEX1	chrXI	70734	73865	1	706.213	-0.465559	0.182316	-2.55359	0.0106618	0.18798	0.00831795	738.691	621.078	533.099	717.464	592.216	883.704	857.238	630.956	654.84	870.471	AAA-peroxin; heterodimerizes with AAA-peroxin Pex6p and participates in the recycling of peroxisomal signal receptor Pex5p from the peroxisomal membrane to the cystosol; induced by oleic acid and upregulated during anaerobiosis	GO:0005777,GO:0005778,GO:0016562,GO:0016887,GO:0046982
YLR132C	USB1	chrXII	407283	408155	1	400.318	-0.580947	0.212497	-2.73391	0.00625868	0.18798	0.00828992	411.806	329.518	267.033	425.095	364.586	535.47	468.721	336.119	394.84	502.095	Putative phosphodiesterase specific for U6 snRNA 3' end modification; trims the 3' poly(u) tract to leave a terminal 3' phosphate; human homolog, hUSB1 (aka C16orf57) produces a 2',3' cyclic phosphate; mutations in hUSB1 are associated with a rare skin condition (OMIM 604173); essential protein that localizes to the nucleus and mitochondria; overexpression suppresses the respiratory defects of ox…	GO:0005634,GO:0005737,GO:0005739,GO:0008081,GO:0034477
YNR030W	ALG12	chrXIV	678799	680454	0	2460.17	-0.456313	0.185194	-2.46397	0.0137408	0.18798	0.00827712	2252.13	2223.44	2316.22	2091.13	2124.23	3816.27	2397.77	2263.93	2107.68	3107.02	Alpha-1,6-mannosyltransferase localized to the ER; responsible for the addition of the alpha-1,6 mannose to dolichol-linked Man7GlcNAc2, acts in the dolichol pathway for N-glycosylation	GO:0000009,GO:0005783,GO:0006486,GO:0006488,GO:0016021
YOR021C	SFM1	chrXV	372798	373439	1	2053.6	0.429278	0.146783	2.92457	0.00344928	0.18798	0.00823047	2270.75	2284.82	2091.76	1971.4	2465.2	1676.77	1614.48	2215.78	2218.3	1645.63	SPOUT methyltransferase; catalyzes omega-monomethylation of Rps3p on Arg-146; not an essential gene; predicted to be involved in rRNA processing and ribosome biogenesis and in biopolymer catabolism	GO:0005575,GO:0018216,GO:0035241
YLL053C	YLL053C	chrXII	35503	35961	1	264.531	-0.740539	0.280992	-2.63545	0.00840269	0.188095	0.00835312	218.699	197.065	317.344	104.882	197.405	409.056	407.266	244.369	151.143	408.161	Putative protein; in the Sigma 1278B strain background YLL053C is contiguous with AQY2 which encodes an aquaporin	GO:0003674,GO:0008150,GO:0016021
YDR019C	GCV1	chrIV	484163	485365	1	4490.45	-0.280408	0.114237	-2.45461	0.0141039	0.190624	0.00849588	4385.61	4344.31	4496.03	3762.74	3735.59	5365.43	5343.42	4408.65	3749.16	5354.42	T subunit of the mitochondrial glycine decarboxylase complex; glycine decarboxylase is required for the catabolism of glycine to 5,10-methylene-THF; expression is regulated by levels of levels of 5,10-methylene-THF in the cytoplasm	GO:0004375,GO:0005739,GO:0005960,GO:0006544,GO:0006546,GO:0006730
YBR203W	COS111	chrII	629168	631942	0	668.461	-0.561876	0.206171	-2.7253	0.00642438	0.193476	0.00865388	731.711	532.237	744.017	368.478	327.749	1144.88	830.157	669.322	348.114	987.518	Protein required for antifungal drug ciclopirox olamine resistance; not related to the subtelomerically-encoded COS family; the authentic, non-tagged protein is detected in highly purified mitochondria in high-throughput studies	GO:0003674,GO:0005739,GO:0007165
YIR034C	LYS1	chrIX	419615	420736	1	12873.8	0.442198	0.168567	2.62327	0.0087089	0.194013	0.0087089	14417.9	14834	13034.3	13590	13493.5	8420.83	12326.3	14095.4	13541.8	10373.6	Saccharopine dehydrogenase (NAD+, L-lysine-forming); catalyzes the conversion of saccharopine to L-lysine, which is the final step in the lysine biosynthesis pathway; also has mRNA binding activity	GO:0003729,GO:0004754,GO:0005737,GO:0009085,GO:0019878
YML131W	YML131W	chrXIII	10198	11295	0	548.806	-0.387891	0.153182	-2.53222	0.0113342	0.196291	0.00884251	530.462	489.432	532.132	453.868	482.651	683.35	669.75	517.342	468.26	676.55	Protein of unknown function; similar to medium chain dehydrogenase/reductases; expression induced by stresses including osmotic shock, DNA damaging agents, and other chemicals; GFP-fusion protein localizes to the cytoplasm; protein abundance increases in response to DNA replication stress	GO:0003674,GO:0005737,GO:0008150
YLR454W	FMP27	chrXII	1043998	1051884	0	2792.75	-0.457491	0.18766	-2.43787	0.0147739	0.196857	0.00889947	2644.16	2176.6	2796.11	2526.44	2433.09	4182.39	2790.45	2538.96	2479.76	3486.42	Putative protein of unknown function; the authentic, non-tagged protein is detected in highly purified mitochondria in high-throughput studies	GO:0003674,GO:0005739,GO:0008150
YBR238C	YBR238C	chrII	695107	697302	1	552.061	-0.503617	0.185678	-2.71231	0.00668152	0.198386	0.00900026	493.236	551.62	415.063	564.318	459.038	723.898	657.251	486.64	511.678	690.574	Mitochondrial membrane protein; not required for respiratory growth but causes a synthetic respiratory defect in combination with rmd9 mutations; transcriptionally up-regulated by TOR; deletion increases life span; YBR238C has a paralog, RMD9, that arose from the whole genome duplication	GO:0000932,GO:0003729,GO:0005737,GO:0005739,GO:0009060,GO:0032592
YFR030W	MET10	chrVI	213312	216419	0	1693.93	-0.428582	0.14809	-2.89407	0.00380288	0.199314	0.00907422	1710.04	1574.9	1591.56	1443.28	1162.71	2289.76	2085.29	1625.5	1302.99	2187.52	Subunit alpha of assimilatory sulfite reductase; complex converts sulfite into sulfide	GO:0000103,GO:0004783,GO:0009337
YNL050C	YNL050C	chrXIV	534079	534982	1	861.14	0.365829	0.141885	2.57835	0.00992721	0.203003	0.00930701	850.367	905.368	881.404	990.342	1036.14	657.113	707.248	879.046	1013.24	682.181	Putative protein of unknown function; YNL050c is not an essential gene	GO:0003674,GO:0005575,GO:0008150
YOR371C	GPB1	chrXV	1031489	1034182	1	264.618	-0.785746	0.30203	-2.60154	0.00928049	0.203003	0.00928049	218.699	260.869	150.932	318.357	177.57	435.293	290.607	210.167	247.964	362.95	Multistep regulator of cAMP-PKA signaling; inhibits PKA downstream of Gpa2p and Cyr1p, thereby increasing cAMP dependency; promotes ubiquitin-dependent proteolysis of Ira2p; regulated by G-alpha protein Gpa2p; GPB1 has a paralog, GPB2, that arose from the whole genome duplication	GO:0000209,GO:0001403,GO:0004862,GO:0004871,GO:0005737,GO:0005886,GO:0007124,GO:0007165,GO:0010255,GO:0032794,GO:0042326,GO:0042787,GO:0046579,GO:0046580
YDR183C-A	YDR183C-A	chrIV	830397	830654	1	216.525	0.672182	0.264825	2.53821	0.011142	0.206387	0.0095281	179.147	290.752	255.423	207.907	277.69	169.347	135.408	241.774	242.798	152.378	Dubious open reading frame unlikely to encode a functional protein; identified by fungal homology and RT-PCR	GO:0003674,GO:0005575,GO:0008150
YNR032C-A	HUB1	chrXIV	687243	687464	1	672.938	0.545257	0.217507	2.50685	0.0121812	0.206387	0.00950326	665.403	860.14	814.645	493.779	806.622	545.011	524.967	780.063	650.201	534.989	Ubiquitin-like protein modifier; promotes alternative splicing of SRC1 pre-mRNA; binds non-covalently to the HIND domain of Snu66, may function in modification of Sph1p and Hbt1p, functionally complemented by the human or S. pombe ortholog; mechanism of Hub1p adduct formation not yet clear	GO:0000398,GO:0000753,GO:0005937,GO:0006464,GO:0031386
YPL189C-A	COA2	chrXVI	188307	188513	1	476.507	0.559326	0.202582	2.76099	0.00576262	0.208528	0.00966022	460.664	481.355	522.457	504.916	702.725	369.701	293.732	488.159	603.821	331.716	Cytochrome oxidase assembly factor; null mutation results in respiratory deficiency with specific loss of cytochrome oxidase activity; functions downstream of assembly factors Mss51p and Coa1p and interacts with assembly factor Shy1p	GO:0003674,GO:0005759,GO:0033617
YGR103W	NOP7	chrVII	695417	697234	0	4049.76	0.346208	0.144094	2.40266	0.0162761	0.210912	0.00980436	3878.42	4280.51	4339.29	4241.67	5052.25	3515.74	3040.44	4166.07	4646.96	3278.09	Component of several different pre-ribosomal particles; forms a complex with Ytm1p and Erb1p that is required for maturation of the large ribosomal subunit; required for exit from G0 and the initiation of cell proliferation	GO:0000462,GO:0003729,GO:0005634,GO:0005730,GO:0030687,GO:0042273,GO:0044786,GO:0070545
YDR454C	GUK1	chrIV	1366264	1366827	1	6753.19	0.33005	0.137633	2.39804	0.0164831	0.212469	0.00992903	6811.08	7223.56	7444.04	6683.65	7719.58	5244.98	6145.45	7159.56	7201.62	5695.22	Guanylate kinase; converts GMP to GDP; required for growth and mannose outer chain elongation of cell wall N-linked glycoproteins	GO:0004385,GO:0005634,GO:0005737,GO:0046037
YMR305C	SCW10	chrXIII	879063	880232	1	28276.4	-0.436802	0.16946	-2.57761	0.0099486	0.212469	0.0099486	29167.2	23631.6	31736.3	18704.2	18411.6	43443.4	32840.7	28178.4	18557.9	38142	Cell wall protein with similarity to glucanases; may play a role in conjugation during mating based on mutant phenotype and its regulation by Ste12p; SWC10 has a paralog, SCW4, that arose from the whole genome duplication	GO:0000747,GO:0005576,GO:0005737,GO:0005783,GO:0009277,GO:0015926
YPL222W	FMP40	chrXVI	130162	132228	0	545.757	-0.40597	0.158943	-2.55419	0.0106435	0.212469	0.00997858	486.256	508.008	506.009	501.204	493.985	608.218	716.622	500.091	497.595	662.42	Putative protein of unknown function; proposed to be involved in responding to environmental stresses; the authentic, non-tagged protein is detected in highly purified mitochondria in high-throughput studies	GO:0003674,GO:0005739,GO:0008150
YNR071C	YNR071C	chrXIV	770440	771468	1	107.958	0.708411	0.275434	2.57198	0.0101119	0.213313	0.0100523	127.962	109.839	134.484	120.66	111.454	67.9773	83.3281	124.095	116.057	75.6527	Putative aldose 1-epimerase	GO:0003674,GO:0005575,GO:0008150
YJR154W	YJR154W	chrX	725784	726824	0	146.856	-0.797284	0.317052	-2.51468	0.011914	0.215468	0.0101882	157.045	121.146	75.4659	157.786	107.676	226.591	182.28	117.886	132.731	204.436	Putative protein of unknown function; green fluorescent protein (GFP)-fusion protein localizes to the cytoplasm	GO:0003674,GO:0005737,GO:0008150
YBR223C	TDP1	chrII	668663	670297	1	416.417	-0.431686	0.165054	-2.61542	0.00891165	0.216728	0.0102825	369.927	403.014	383.135	370.334	348.529	497.307	542.675	385.359	359.431	519.991	Tyrosyl-DNA phosphodiesterase I; hydrolyzes 3' and 5'-phosphotyrosyl bonds; involved in the repair of DNA lesions created by topoisomerase I and topoisomerase II; mutations in human homolog result in the neurodegenerative disease SCANI	GO:0005634,GO:0006281,GO:0017005,GO:0070260
YLR009W	RLP24	chrXII	166537	167136	0	2563.69	0.348758	0.146367	2.38276	0.0171833	0.217436	0.0103508	2576.69	2621.61	2403.3	3539.98	2825.07	1918.87	2060.29	2533.87	3182.53	1989.58	Essential protein required for ribosomal large subunit biogenesis; associated with pre-60S ribosomal subunits; stimulates the ATPase activity of Afg2p, which is required for release of Rlp24p from the pre-60S particle; has similarity to Rpl24Ap and Rpl24Bp	GO:0001671,GO:0005730,GO:0030687,GO:0042273,GO:1902626
YNL139C	THO2	chrXIV	360924	365717	1	954.434	-0.506559	0.197747	-2.56165	0.0104177	0.218109	0.0104177	937.614	838.334	746.919	1063.67	705.559	1279.64	1109.31	840.956	884.612	1194.47	Subunit of the THO complex; THO is required for efficient transcription elongation and involved in transcriptional elongation-associated recombination; required for LacZ RNA expression from certain plasmids	GO:0000445,GO:0000446,GO:0000781,GO:0003676,GO:0003677,GO:0003729,GO:0005634,GO:0006283,GO:0006310,GO:0006368,GO:0006406,GO:0031124
YER169W	RPH1	chrV	523369	525759	0	1177.97	-0.545868	0.205163	-2.66065	0.00779895	0.218486	0.0105055	1242.4	1034.59	829.158	1249.3	868.961	1478.8	1542.61	1035.38	1059.13	1510.71	JmjC domain-containing histone demethylase; specifically demethylates H3K36 tri- and dimethyl modification states; associates with actively transcribed (RNAP II) regions in vivo and specifically targets H3K36 in its trimethylation state as its substrate; transcriptional repressor of PHR1; Rph1p phosphorylation during DNA damage is under control of the MEC1-RAD53 pathway; target of stess-induced h…	GO:0000122,GO:0001078,GO:0005634,GO:0016577,GO:0032454,GO:0043565,GO:0051864
YLR329W	REC102	chrXII	786442	787333	0	73.3261	0.85506	0.334163	2.55881	0.0105031	0.218486	0.0105031	82.5938	102.571	86.1086	75.1806	67.0611	39.3553	60.4129	90.4243	71.1208	49.8841	Protein involved in early stages of meiotic recombination; required for chromosome synapsis; forms a complex with Rec104p and Spo11p necessary during the initiation of recombination	GO:0000794,GO:0003674,GO:0005634,GO:0007131,GO:0042138
YKL039W	PTM1	chrXI	362622	364193	0	3344.43	-0.421136	0.177383	-2.37416	0.0175888	0.21962	0.0105951	2884.97	2979.4	3273.09	3047.13	3067.81	4909.87	3248.76	3045.82	3057.47	4079.31	Protein of unknown function; copurifies with late Golgi vesicles containing the v-SNARE Tlg2p; PTM1 has a paralog, YHL017W, that arose from the whole genome duplication	GO:0003674,GO:0008150,GO:0016021
YGR052W	FMP48	chrVII	593596	594705	0	279.242	0.649589	0.2451	2.6503	0.00804201	0.220071	0.010652	164.024	214.025	250.586	521.623	537.433	109.718	157.282	209.545	529.528	133.5	Putative protein of unknown function; the authentic, non-tagged protein is detected in highly purified mitochondria in high-throughput studies; induced by treatment with 8-methoxypsoralen and UVA irradiation	GO:0004672,GO:0005739,GO:0006468
YNL158W	PGA1	chrXIV	339612	340208	0	653.77	-0.5135	0.208453	-2.46339	0.0137632	0.220988	0.0107375	672.383	562.12	586.312	551.324	471.317	1059.01	673.916	606.938	511.321	866.465	Essential component of GPI-mannosyltransferase II; complex is responsible for second mannose addition to GPI precursors as a partner of Gpi18p; required for maturation of Gas1p and Pho8p; has synthetic genetic interactions with secretory pathway genes	GO:0000030,GO:0005635,GO:0006506,GO:0030176,GO:0031501
YOR071C	NRT1	chrXV	459480	461276	1	1348.04	-0.384734	0.145053	-2.65236	0.00799308	0.220988	0.010767	1264.5	1227.62	1285.82	1091.51	1277.94	1756.68	1532.2	1259.31	1184.72	1644.44	High-affinity nicotinamide riboside transporter; also transports thiamine with low affinity; major transporter for 5-aminoimidazole-4-carboxamide-1-beta-D-ribofuranoside (acadesine) uptake; shares sequence similarity with Thi7p and Thi72p; proposed to be involved in 5-fluorocytosine sensitivity	GO:0005886,GO:0015888,GO:0016021,GO:0034257,GO:0034258,GO:1903088,GO:1903089
YFL066C	YFL066C	chrVI	1437	2615	1	289.982	-0.617677	0.242399	-2.54819	0.0108285	0.221523	0.0108285	303.619	230.178	213.82	285.872	232.353	456.759	307.273	249.206	259.112	382.016	Helicase-like protein encoded within the telomeric Y' element; induced by treatment with 8-methoxypsoralen and UVA irradiation	GO:0003674,GO:0005575,GO:0008150
YLR466C-B	YLR466C-B	chrXII	1071594	1071710	1	229.297	0.591174	0.223881	2.64057	0.0082767	0.222401	0.0109629	209.393	270.56	275.741	268.237	246.52	150.266	184.364	251.898	257.379	167.315	Dubious open reading frame; unlikely to encode a functional protein, based on available experimental and comparative sequence data	GO:0003674,GO:0005575,GO:0008150
YOR153W	PDR5	chrXV	619840	624375	0	6573.33	-0.299858	0.122074	-2.45636	0.0140353	0.222401	0.0109605	6506.3	6367.46	6379.78	5258.93	5699.25	8321.85	7479.74	6417.84	5479.09	7900.79	Plasma membrane ATP-binding cassette (ABC) transporter; multidrug transporter actively regulated by Pdr1p; also involved in steroid transport, cation resistance, and cellular detoxification during exponential growth; PDR5 has a paralog, PDR15, that arose from the whole genome duplication	GO:0005739,GO:0005886,GO:0008559,GO:0015893,GO:0016021,GO:0030003,GO:0042493
YOR378W	YOR378W	chrXV	1049511	1051058	0	196.366	-0.578472	0.232482	-2.48825	0.0128375	0.222401	0.0109779	187.29	197.873	135.452	167.996	167.181	271.909	246.86	173.538	167.588	259.384	Low affinity NH4+ transporter; member of the DHA2 family of drug:H+ anti porters; putative paralog of ATR1; but not required for boron tolerance; non-essential gene	GO:0005886,GO:0008519,GO:0015696,GO:0016021
YPL220W	RPL1A	chrXVI	135790	136443	0	21795.1	0.518246	0.211491	2.45044	0.0142681	0.225004	0.0111423	22923.8	25015.1	28012.4	14841.2	26418.3	19009.8	16344.8	25317.1	20629.8	17677.3	Ribosomal 60S subunit protein L1A; N-terminally acetylated; homologous to mammalian ribosomal protein L10A and bacterial L1; RPL1A has a paralog, RPL1B, that arose from the whole genome duplication; rpl1a rpl1b double null mutation is lethal	GO:0002181,GO:0003735,GO:0022625
YCL041C	YCL041C	chrIII	50133	50627	1	42.5422	-1.07073	0.406644	-2.6331	0.00846087	0.225578	0.0112068	24.4291	36.3439	36.7655	37.1262	25.5021	75.1328	62.4961	32.5129	31.3142	68.8144	Dubious open reading frame; unlikely to encode a functional protein, based on available experimental and comparative sequence data; partially overlaps both the verified gene PDI1/YCL043C and the uncharacterized gene YCL042W	GO:0003674,GO:0008150,GO:0016021
YDR086C	SSS1	chrIV	616928	617170	1	6072.62	0.308644	0.126126	2.44712	0.0144003	0.225632	0.0112456	6110.78	6047.63	6434.92	7455.87	6451.09	4988.58	5019.48	6197.78	6953.48	5004.03	Subunit of the Sec61p translocation complex (Sec61p-Sss1p-Sbh1p); this complex forms a channel for passage of secretory proteins through the endoplasmic reticulum membrane, and of the Ssh1p complex (Ssh1p-Sbh2p-Sss1p); interacts with Ost4p and Wbp1p	GO:0005198,GO:0005784,GO:0006616,GO:0015450,GO:0031204,GO:0071261
YLL045C	RPL8B	chrXII	47859	48629	1	18714.2	0.398876	0.164025	2.43179	0.0150242	0.228444	0.0114222	20199.4	21259.6	20878.9	17819.7	19323	12873.9	18644.7	20779.3	18571.3	15759.3	Ribosomal 60S subunit protein L8B; required for processing of 27SA3 pre-rRNA to 27SB pre-rRNA during assembly of large ribosomal subunit; depletion leads to a turnover of pre-rRNA; L8 binds to Domain I of 25S and 5.8 S rRNAs; mutation results in decreased amounts of free 60S subunits; homologous to mammalian ribosomal protein L7A, no bacterial homolog; RPL8B has a paralog, RPL8A, that arose from …	GO:0000470,GO:0002181,GO:0003735,GO:0022625
YDL048C	STP4	chrIV	366739	368211	1	2564.1	0.396008	0.162431	2.43801	0.0147684	0.229925	0.011533	1786.82	2082.91	2295.91	4549.82	4109.62	1397.71	1725.93	2055.21	4329.72	1561.82	Protein containing a Kruppel-type zinc-finger domain; similar to Stp1p, Stp2p; predicted transcription factor; relative distribution to the nucleus increases upon DNA replication stress; STP4 has a paralog, STP3, that arose from the whole genome duplication	GO:0005634,GO:0005737,GO:0005739,GO:0008150,GO:0043565
YGR043C	NQM1	chrVII	580435	581436	1	297.212	-0.514939	0.196595	-2.61929	0.00881126	0.230473	0.0116709	248.945	245.524	319.279	246.889	244.631	388.782	386.434	271.249	245.76	387.608	Transaldolase of unknown function; transcription is repressed by Mot1p and induced by alpha-factor and during diauxic shift; NQM1 has a paralog, TAL1, that arose from the whole genome duplication	GO:0004801,GO:0005634,GO:0008150
YJL202C	YJL202C	chrX	53943	54290	1	76.0353	0.919083	0.350616	2.62134	0.00875848	0.230473	0.011601	69.7976	105.801	118.036	59.4019	75.5618	45.3182	58.3297	97.8784	67.4819	51.8239	Dubious open reading frame; unlikely to encode a functional protein, based on available experimental and comparative sequence data; overlaps 3' end of essential PRP21 gene encoding a subunit of the SF3a splicing factor complex	GO:0003674,GO:0005575,GO:0008150
YPR062W	FCY1	chrXVI	677165	677641	0	5488.56	0.291792	0.124732	2.33935	0.0193176	0.230473	0.0116365	5267.39	5992.71	5890.21	5876.15	6052.5	4573.56	4767.41	5716.77	5964.33	4670.48	Cytosine deaminase; zinc metalloenzyme that catalyzes the hydrolytic deamination of cytosine to uracil; of biomedical interest because it also catalyzes the deamination of 5-fluorocytosine (5FC) to form anticancer drug 5-fluorouracil (5FU)	GO:0004131,GO:0005634,GO:0005737,GO:0008655,GO:0019858,GO:0046087
YGL215W	CLG1	chrVII	87981	89339	0	2971.13	-0.483893	0.192053	-2.51958	0.0117495	0.231294	0.0117495	2944.29	2778.29	2114.01	3307.02	2348.08	3903.33	3402.91	2612.2	2827.55	3653.12	Cyclin-like protein that interacts with Pho85p; has sequence similarity to G1 cyclins PCL1 and PCL2	GO:0000307,GO:0016239,GO:0016538
YDR185C	UPS3	chrIV	831934	832473	1	249.704	0.490516	0.199431	2.45957	0.0139102	0.233431	0.0118953	285.007	264.907	307.669	258.955	224.796	200.354	206.237	285.861	241.876	203.296	Mitochondrial protein of unknown function; similar to Ups1p and Ups2p which are involved in regulation of mitochondrial cardiolipin and phosphatidylethanolamine levels; null is viable but interacts synthetically with ups1 and ups2 mutations; UPS3 has a paralog, UPS2, that arose from the whole genome duplication	GO:0003674,GO:0005739,GO:0005758,GO:0031314,GO:0070584
YFL011W	HXT10	chrVI	112345	113985	0	29.9154	-1.28203	0.500229	-2.56288	0.0103807	0.234309	0.0119774	18.6127	14.5376	32.8954	14.8505	21.724	53.6663	53.1217	22.0152	18.2873	53.394	Putative hexose transporter; expressed at low levels and expression is repressed by glucose	GO:0005353,GO:0005354,GO:0005355,GO:0005739,GO:0005886,GO:0008645,GO:0015578,GO:0016021,GO:0055085
YDL173W	PAR32	chrIV	148191	149078	0	1410.29	-0.446171	0.156638	-2.84842	0.00439373	0.235164	0.0120587	1513.44	1235.69	1333.23	1149.06	935.078	1838.96	1866.55	1360.79	1042.07	1852.76	Putative protein of unknown function; hyperphosphorylated upon rapamycin treatment in a Tap42p-dependent manner; green fluorescent protein (GFP)-fusion protein localizes to the cytoplasm; PAR32 is not an essential gene	GO:0003674,GO:0005737,GO:0008150
YBR220C	YBR220C	chrII	662995	664677	1	1314.3	-0.464757	0.185549	-2.50477	0.0122532	0.23579	0.0122532	1217.97	1195.31	1219.07	1013.55	1210.88	2005.93	1337.42	1210.78	1112.21	1671.67	Putative protein of unknown function; YBR220C is not an essential gene	GO:0003674,GO:0008150,GO:0016021
YEL054C	RPL12A	chrV	52721	53218	1	5303.58	0.356432	0.153468	2.32252	0.0202047	0.23579	0.0121708	5889.75	5793.22	6060.5	4590.66	5552.85	4048.82	5189.26	5914.49	5071.75	4619.04	Ribosomal 60S subunit protein L12A; rpl12a rpl12b double mutant exhibits slow growth and slow translation; homologous to mammalian ribosomal protein L12 and bacterial L11; RPL12A has a paralog, RPL12B, that arose from the whole genome duplication	GO:0000027,GO:0002181,GO:0003735,GO:0022625
YHR007C	ERG11	chrVIII	120091	121683	1	9670.09	-0.4196	0.174503	-2.40454	0.016193	0.23579	0.0123107	9244.69	8161.23	10121.1	7595.09	8021.83	14523.3	10023.3	9175.69	7808.46	12273.3	Lanosterol 14-alpha-demethylase; catalyzes the C-14 demethylation of lanosterol to form 4,4''-dimethyl cholesta-8,14,24-triene-3-beta-ol in the ergosterol biosynthesis pathway; member of the cytochrome P450 family; associated and coordinately regulated with the P450 reductase Ncp1p	GO:0005783,GO:0006696,GO:0008398
YIL047C-A	YIL047C-A	chrIX	265099	265467	1	41.1981	1.03584	0.4227	2.45054	0.0142643	0.23579	0.0121981	51.1849	53.3044	68.6934	25.0602	34.0028	23.8517	32.2897	57.7276	29.5315	28.0707	Dubious open reading frame; unlikely to encode a functional protein, based on available experimental and comparative sequence data; almost completely overlaps ORF SYG1/YIL047C	GO:0003674,GO:0008150,GO:0016021
YJL020C	BBC1	chrX	398937	402410	1	3832.2	-0.367501	0.146828	-2.50294	0.0123168	0.23579	0.0123168	3692.29	3291.95	3573.02	4035.62	3153.76	4575.94	4502.84	3519.09	3594.69	4539.39	Protein possibly involved in assembly of actin patches; interacts with an actin assembly factor Las17p and with the SH3 domains of Type I myosins Myo3p and Myo5p; localized predominantly to cortical actin patches	GO:0017024,GO:0030036,GO:0030479
YMR138W	CIN4	chrXIII	545155	545730	0	426.427	0.435028	0.173772	2.50344	0.0122991	0.23579	0.0122991	450.194	445.819	466.341	430.664	520.432	326.768	344.77	454.118	475.548	335.769	GTP-binding protein involved in beta-tubulin (Tub2p) folding; isolated as mutant with increased chromosome loss and sensitivity to benomyl; regulated by the GTPase-activating protein, Cin2p, the human retinitis pigmentosa 2 (RP2) homolog	GO:0003674,GO:0005737,GO:0006457,GO:0007021,GO:0072668
YCR091W	KIN82	chrIII	274404	276566	0	308.583	-0.53748	0.21503	-2.49956	0.0124349	0.236507	0.0124349	279.19	264.099	250.586	303.507	293.747	462.722	306.231	264.625	298.627	384.477	Putative serine/threonine protein kinase; implicated in the regulation of phospholipid asymmetry through the activation of phospholipid translocases (flippases); involved in the phosphorylation of upstream inhibitory kinase Ypk1p along with Fpk1p; has a redundant role in the cellular response to mating pheromone; KIN82 has a paralog, FPK1, that arose from the whole genome duplication	GO:0000749,GO:0004672,GO:0005575,GO:0006468,GO:0045332
YER030W	CHZ1	chrV	213437	213898	0	2329.93	0.318148	0.13752	2.31346	0.0206974	0.236507	0.0124676	2269.58	2456.85	2460.38	2640.6	2637.11	2092.98	1751.97	2395.61	2638.85	1922.48	Histone chaperone for Htz1p/H2A-H2B dimer; required for the stabilization of the Chz1p-Htz1-H2B complex; has overlapping function with Nap1p; null mutant displays weak sensitivity to MMS and benomyl; contains a highly conserved CHZ motif; protein abundance increases in response to DNA replication stress	GO:0005634,GO:0006338,GO:0042393
YGL222C	EDC1	chrVII	80659	81186	1	596.272	0.424342	0.176094	2.40975	0.0159633	0.236507	0.012454	618.872	650.96	684.999	551.324	697.058	443.641	527.051	651.61	624.191	485.346	RNA-binding protein that activates mRNA decapping directly; binds to mRNA substrate and enhances activity of decapping proteins Dcp1p and Dcp2p; has a role in translation during heat stress; protein becomes more abundant and forms cytoplasmic foci in response to DNA replication stress; EDC1 has a paralog, EDC2, that arose from the whole genome duplication	GO:0000290,GO:0003729,GO:0005634,GO:0005737,GO:0032056
YPR143W	RRP15	chrXVI	818323	819075	0	921.398	0.380575	0.146482	2.5981	0.00937405	0.23881	0.0126272	915.511	961.095	1056.52	972.707	1041.81	733.439	768.702	977.71	1007.26	751.07	Nucleolar protein; constituent of pre-60S ribosomal particles; required for proper processing of the 27S pre-rRNA at the A3 and B1 sites to yield mature 5.8S and 25S rRNAs	GO:0000463,GO:0000466,GO:0003674,GO:0005634,GO:0005730,GO:0030687
YDR039C	ENA2	chrIV	531307	534582	1	2089.01	-0.601423	0.21293	-2.82451	0.00473523	0.240187	0.012996	1965.96	1629.02	2285.26	1289.21	1505.57	3673.16	2274.86	1960.08	1397.39	2974.01	P-type ATPase sodium pump; involved in Na+ efflux to allow salt tolerance; likely not involved in Li+ efflux	GO:0005739,GO:0005886,GO:0006813,GO:0006814,GO:0008554,GO:0008556,GO:0015662,GO:0016021,GO:0055085
YHL049C	YHL049C	chrVIII	3726	4541	1	91.4688	-0.783909	0.322552	-2.43034	0.0150848	0.240187	0.0128997	98.8799	71.0726	57.0832	81.6777	71.7837	151.458	108.327	75.6786	76.7307	129.892	Putative protein of unknown function	GO:0003674,GO:0005575,GO:0008150
YHR118C	ORC6	chrVIII	344321	345628	1	725.924	0.356195	0.148807	2.39367	0.0166808	0.240187	0.0130137	770.1	776.145	725.634	769.441	856.682	602.255	581.214	757.293	813.061	591.734	Subunit of the origin recognition complex (ORC); ORC directs DNA replication by binding to replication origins and is also involved in transcriptional silencing; phosphorylated by Cdc28p; mutation in the human Orc6p is linked to Meier-Gorlin syndrome	GO:0003688,GO:0005656,GO:0005664,GO:0006267,GO:0006270,GO:0030466,GO:0031261
YJL060W	BNA3	chrX	323386	324720	0	2370.26	-0.308628	0.14007	-2.20338	0.0275682	0.240187	0.0130453	2503.41	2272.71	2116.92	2027.09	1982.55	2648.73	3040.44	2297.68	2004.82	2844.58	Kynurenine aminotransferase; catalyzes formation of kynurenic acid from kynurenine; potential Cdc28p substrate	GO:0004061,GO:0005737,GO:0005739,GO:0016212,GO:0034276,GO:0047536
YLR352W	YLR352W	chrXII	831116	833539	0	679.369	-0.44062	0.177196	-2.48663	0.012896	0.240187	0.012896	654.934	672.767	559.222	660.847	500.597	831.231	875.987	628.974	580.722	853.609	Putative protein of unknown function with similarity to F-box proteins; interacts with Skp1p and Cdc53p; YLR352W is not an essential gene	GO:0003674,GO:0008150,GO:0019005
YMR272C	SCS7	chrXIII	809623	810777	1	4209.83	-0.313425	0.136358	-2.29855	0.0215304	0.240187	0.0129694	3672.52	3680.43	3970.67	4254.66	4508.21	5130.49	4251.82	3774.54	4381.44	4691.16	Sphingolipid alpha-hydroxylase; functions in the alpha-hydroxylation of sphingolipid-associated very long chain fatty acids, has both cytochrome b5-like and hydroxylase/desaturase domains, not essential for growth	GO:0005783,GO:0006673,GO:0016020,GO:0016021,GO:0080132
YNR044W	AGA1	chrXIV	703699	705876	0	5318.55	-0.340616	0.14781	-2.30442	0.0211992	0.240187	0.0127699	4926.55	4859.59	4971.08	5231.08	4782.12	7066.06	5393.41	4919.07	5006.6	6229.74	Anchorage subunit of a-agglutinin of a-cells; highly O-glycosylated protein with N-terminal secretion signal and C-terminal signal for addition of GPI anchor to cell wall, linked to adhesion subunit Aga2p via two disulfide bonds; AGA1 has a paralog, FIG2, that arose from the whole genome duplication	GO:0000752,GO:0009277,GO:0050839
YOR126C	IAH1	chrXV	559961	560677	1	739.354	0.462202	0.173251	2.66781	0.00763466	0.240187	0.0127984	796.856	831.872	852.378	631.146	862.349	599.869	601.004	827.035	746.747	600.437	Isoamyl acetate-hydrolyzing esterase; required in balance with alcohol acetyltransferase to maintain optimal amounts of isoamyl acetate, which is particularly important in sake brewing	GO:0005575,GO:0006083,GO:0016788
YOR230W	WTM1	chrXV	770800	772113	0	16273.3	-0.365181	0.147047	-2.48344	0.0130121	0.240187	0.0130121	16971.3	14874.4	15029.3	14498.7	12291.1	18207.2	22041.3	15625	13394.9	20124.3	Transcriptional modulator; involved in regulation of meiosis, silencing, and expression of RNR genes; required for nuclear localization of the ribonucleotide reductase small subunit Rnr2p and Rnr4p; contains WD repeats	GO:0003714,GO:0005515,GO:0005634,GO:0006606,GO:0010674,GO:0031939,GO:0045944,GO:0051457,GO:0061186
YPR115W	RGC1	chrXVI	754877	758128	0	2038.81	-0.432738	0.153483	-2.81945	0.00481067	0.242378	0.013203	2062.52	1783.28	1688.31	2069.79	1689.75	2486.54	2491.51	1844.7	1879.77	2489.02	Pleckstrin homology domain containing protein; proposed to function as a glycerol channel activator; green fluorescent protein (GFP)-fusion protein localizes to the cytoplasm; RGC1 has a paralog, ASK10, that arose from the whole genome duplication	GO:0003674,GO:0005737,GO:0090372
YDL223C	HBT1	chrIV	57265	60405	1	617.613	-0.43502	0.176117	-2.47006	0.0135089	0.243192	0.0135089	613.055	630.769	529.229	540.186	411.812	801.416	796.825	591.018	475.999	799.121	Shmoo tip protein, substrate of Hub1p ubiquitin-like protein; mutants are defective for mating projection formation, thereby implicating Hbt1p in polarized cell morphogenesis; HBT1 has a paralog, YNL195C, that arose from the whole genome duplication	GO:0000753,GO:0003674,GO:0005886,GO:0005937
YDR496C	PUF6	chrIV	1441433	1443403	1	2670.47	0.28927	0.126748	2.28224	0.022475	0.243192	0.0135384	2904.74	2771.83	2588.1	2905.13	3014.92	2307.65	2200.9	2754.89	2960.02	2254.28	Pumilio-homology domain protein; binds the 3' UTR of ASH1 mRNA and represses its translation, resulting in proper asymmetric localization of ASH1 mRNA; required at post-transcriptional step for efficient retrotransposition; absence results in decreased Ty1 Gag:GFP protein levels; co-sediments with the 60S ribosomal subunit and is required for its biogenesis	GO:0000900,GO:0003729,GO:0003730,GO:0005634,GO:0005730,GO:0015934,GO:0017148,GO:0042273
YGL157W	ARI1	chrVII	209006	210049	0	2835.27	-0.325113	0.137099	-2.37138	0.0177218	0.243192	0.0134731	2649.98	2488.35	2716.77	2875.42	2557.77	3041.09	3517.49	2618.37	2716.6	3279.29	NADPH-dependent aldehyde reductase; utilizes aromatic and alophatic aldehyde substrates; member of the short-chain dehydrogenase/reductase superfamily	GO:0004090,GO:0005634,GO:0005737,GO:0008150,GO:0016491
YGR099W	TEL2	chrVII	687899	689965	0	867.153	0.391342	0.159798	2.44898	0.014326	0.243192	0.013431	895.735	1003.9	824.32	1050.67	910.52	671.424	713.497	907.985	980.596	692.461	Subunit of the ASTRA complex, involved in chromatin remodeling; subunit of the telomere cap complex DNA-binding protein specific to single-stranded yeast telomeric DNA repeats, required for telomere length regulation and telomere position effect; involved in the stability or biogenesis of PIKKs such as TORC1	GO:0000723,GO:0000784,GO:0007004,GO:0034502,GO:0042162,GO:0070209
YJR148W	BAT2	chrX	705744	706874	0	6521.24	0.396826	0.167093	2.37489	0.0175543	0.243192	0.0133457	6908.8	7490.89	6883.85	6550.92	7038.58	4395.86	6379.81	7094.51	6794.75	5387.84	Cytosolic branched-chain amino acid (BCAA) aminotransferase; preferentially involved in BCAA catabolism; homolog of murine ECA39; highly expressed during stationary phase and repressed during logarithmic phase; BAT2 has a paralog, BAT1, that arose from the whole genome duplication	GO:0004084,GO:0005634,GO:0005737,GO:0009082,GO:0009083
YKR091W	SRL3	chrXI	611525	612265	0	612.49	-0.500445	0.194192	-2.57706	0.00996433	0.243192	0.0134223	578.157	457.934	527.294	715.608	536.489	659.499	812.449	521.128	626.048	735.974	GTB motif (G1/S transcription factor binding) containing protein; binds SBF-regulated promoters in hydroxyurea-treated cells; when overexpressed, suppresses the lethality of a rad53 null mutation; potential Cdc28p substrate; SRL3 has a paralog, WHI5, that arose from the whole genome duplication	GO:0001047,GO:0005737,GO:0006139
YNL332W	THI12	chrXIV	14832	15854	0	49.9593	1.00448	0.406561	2.47068	0.0134857	0.243192	0.0134061	52.3482	61.3809	89.0111	35.2699	44.3926	29.8146	37.4977	67.5801	39.8312	33.6561	Protein involved in synthesis of the thiamine precursor HMP; member of a subtelomeric gene family including THI5, THI11, THI12, and THI13; hydroxymethylpyrimidine is also known as HMP	GO:0003674,GO:0005575,GO:0009228
YPR184W	GDB1	chrXVI	902044	906654	0	1101.42	-0.543913	0.220318	-2.46876	0.0135581	0.243192	0.0135581	1070.23	944.135	787.555	1360.68	825.513	1227.17	1494.7	933.973	1093.09	1360.93	Glycogen debranching enzyme; contains glucanotranferase and alpha-1,6-amyloglucosidase activities; required for glycogen degradation; phosphorylated in mitochondria; activity is inhibited by Igd1p; protein abundance increases in response to DNA replication stress	GO:0004134,GO:0004135,GO:0005737,GO:0005739,GO:0005980
YLR128W	DCN1	chrXII	398530	399433	0	448.375	-0.396851	0.164755	-2.40874	0.0160079	0.24484	0.0136891	435.072	380.4	384.102	435.305	452.426	512.811	538.508	399.858	443.866	525.659	Scaffold-type E3 ligase; required for cullin neddylation and ubiquitin ligase activation; contains a ubiquitin-binding domain (UBA) for ubiquitin and Nedd8 (Rub1p) interaction and a PONY domain involved in cullin binding and neddylation	GO:0005575,GO:0030674,GO:0031624,GO:0032182,GO:0043130,GO:0045116,GO:0051443,GO:0097602
YOR297C	TIM18	chrXV	874743	875321	1	522.141	0.407192	0.166866	2.44023	0.0146779	0.245281	0.0137609	546.748	616.232	514.716	579.169	554.435	403.093	440.598	559.232	566.802	421.845	Component of the mitochondrial TIM22 complex; involved in insertion of polytopic proteins into the inner membrane; may mediate assembly or stability of the complex	GO:0005739,GO:0006915,GO:0006970,GO:0015266,GO:0016021,GO:0034599,GO:0042721,GO:0045039,GO:0046685
YPR167C	MET16	chrXVI	876847	877632	1	622.278	-0.410101	0.155189	-2.64259	0.00822745	0.245281	0.0137922	557.217	545.967	589.215	609.798	555.379	703.624	794.742	564.133	582.589	749.183	3'-phosphoadenylsulfate reductase; reduces 3'-phosphoadenylyl sulfate to adenosine-3',5'-bisphosphate and free sulfite using reduced thioredoxin as cosubstrate, involved in sulfate assimilation and methionine metabolism	GO:0000096,GO:0004604,GO:0005737,GO:0019379
YJL101C	GSH1	chrX	234320	236356	1	2418.44	-0.390231	0.165301	-2.36073	0.0182389	0.245899	0.0138662	2193.97	2179.02	2726.45	1611.28	2014.67	3290.34	2913.36	2366.48	1812.97	3101.85	Gamma glutamylcysteine synthetase; catalyzes the first step in glutathione (GSH) biosynthesis; expression induced by oxidants, cadmium, and mercury; protein abundance increases in response to DNA replication stress	GO:0004357,GO:0005622,GO:0006750,GO:0042542,GO:0046686
YIL064W	EFM4	chrIX	241943	242716	0	985.572	0.36966	0.140141	2.63777	0.0083454	0.247392	0.0139899	1041.15	1105.66	1077.81	975.491	1035.2	791.875	871.821	1074.87	1005.34	831.848	Lysine methyltransferase; involved in the dimethylation of eEF1A (Tef1p/Tef2p) at lysine 316; sequence similarity to S-adenosylmethionine-dependent methyltransferases of the seven beta-strand family; role in vesicular transport	GO:0005737,GO:0016192,GO:0016279,GO:0018026,GO:0018027
YNL002C	RLP7	chrXIV	626174	627142	1	3400.65	0.274376	0.126657	2.16629	0.0302889	0.25274	0.0143327	3297.94	3633.59	3474.34	3990.14	3672.3	2773.95	2962.32	3468.62	3831.22	2868.13	Nucleolar protein similar to large ribosomal subunit L7 proteins; constituent of 66S pre-ribosomal particles; plays an essential role in processing of precursors to the large ribosomal subunit RNAs; binds junction of ITS2 and ITS2-proximal stem between the 3' end of 5.8S rRNA and the 5' end of 25S rRNA	GO:0000463,GO:0000465,GO:0003729,GO:0005730,GO:0019843,GO:0030687,GO:0042273
YDL105W	NSE4	chrIV	272389	273597	0	426.209	0.388445	0.162643	2.38833	0.0169252	0.253086	0.0144736	442.051	449.05	446.023	493.779	471.317	345.849	335.396	445.708	482.548	340.622	Component of the SMC5-SMC6 complex; this complex plays a key role in the removal of X-shaped DNA structures that arise between sister chromatids during DNA replication and repair	GO:0005634,GO:0006281,GO:0019789,GO:0030915
YKL169C	YKL169C	chrXI	130685	131068	1	104.25	0.776524	0.317322	2.44712	0.0144005	0.253086	0.0144005	117.493	126.8	128.679	80.7495	131.289	57.244	87.4945	124.324	106.019	72.3693	Dubious open reading frame; unlikely to encode a functional protein, based on available experimental and comparative sequence data; partially overlaps the verified gene MRPL38	GO:0003674,GO:0005575,GO:0008150
YOR030W	DFG16	chrXV	386825	388684	0	563.824	-0.67605	0.276401	-2.4459	0.014449	0.253086	0.014449	595.606	423.205	370.557	664.559	413.701	930.215	548.924	463.123	539.13	739.57	Probable multiple transmembrane protein; involved in diploid invasive and pseudohyphal growth upon nitrogen starvation; is glycosylated and phosphorylated; interacts with Rim21p and Rim9p in the plasma membrane to form a pH-sensing complex in the Rim101 pathway and is required to maintain Rim21p levels; required for accumulation of processed Rim101p	GO:0003674,GO:0005886,GO:0007124,GO:0016021,GO:0016485
YGL028C	SCW11	chrVII	441281	442909	1	4837.57	-0.285457	0.13221	-2.15912	0.0308409	0.254318	0.0145939	4781.13	4401.65	4654.7	4506.19	4275.85	6091.72	5151.76	4612.5	4391.02	5621.74	Cell wall protein with similarity to glucanases; may play a role in conjugation during mating based on its regulation by Ste12p	GO:0007109,GO:0009277,GO:0042973
YGR248W	SOL4	chrVII	985972	986739	0	699.144	-0.365308	0.15107	-2.41814	0.0155999	0.254318	0.0146253	606.076	600.079	627.915	703.542	782.065	744.172	830.157	611.357	742.803	787.164	6-phosphogluconolactonase; protein abundance increases in response to DNA replication stress; SOL4 has a paralog, SOL3, that arose from the whole genome duplication	GO:0005634,GO:0005737,GO:0005829,GO:0009051,GO:0017057
YPR083W	MDM36	chrXVI	704854	706593	0	498.102	-0.408801	0.167546	-2.43994	0.0146897	0.25473	0.0146897	404.826	481.355	468.276	480.784	450.537	633.262	567.673	451.486	465.661	600.467	Mitochondrial protein; required for normal mitochondrial morphology and inheritance; component of the mitochondria-ER-cortex-ancor (MECA); interacts with Num1p to link the ER and mitochondria at the cell cortex; proposed involvement in the formation of Dnm1p and Num1p-containing cortical anchor complexes that promote mitochondrial fission	GO:0000001,GO:0000266,GO:0003674,GO:0005737,GO:0005739,GO:0007005,GO:0051646
YBR291C	CTP1	chrII	783673	784572	1	4738.76	0.363529	0.155594	2.3364	0.0194704	0.255182	0.0152049	4720.64	5107.53	4817.24	4963.77	5974.11	3315.38	4272.65	4881.81	5468.94	3794.02	Mitochondrial inner membrane citrate transporter; member of the mitochondrial carrier family	GO:0005371,GO:0005739,GO:0005743,GO:0006843,GO:0016021,GO:0055085
YDR382W	RPP2B	chrIV	1239492	1239824	0	38490.4	0.405584	0.180613	2.24559	0.02473	0.255182	0.0148968	41821.5	45376.6	47061.7	26434.8	41167	32074.5	35496.7	44753.3	33800.9	33785.6	Ribosomal protein P2 beta; a component of the ribosomal stalk, which is involved in the interaction between translational elongation factors and the ribosome; free (non-ribosomal) P2 stimulates the phosphorylation of the eIF2 alpha subunit (Sui2p) by Gcn2p; regulates the accumulation of P1 (Rpp1Ap and Rpp1Bp) in the cytoplasm	GO:0002181,GO:0003735,GO:0022625,GO:0030295,GO:0045860
YGR046W	TAM41	chrVII	584895	586052	0	774.9	-0.570671	0.217869	-2.61933	0.00881023	0.255182	0.0147691	729.385	660.652	666.616	718.392	612.051	1290.38	746.828	685.551	665.221	1018.6	Mitochondrial phosphatidate cytidylyltransferase (CDP-DAG synthase); required for cardiolipin biosynthesis; viability of null mutant is strain-dependent; mRNA is targeted to the bud; mutant displays defect in mitochondrial protein import, likely due to altered membrane lipid composition	GO:0004605,GO:0005739,GO:0005759,GO:0031314,GO:0032049
YGR230W	BNS1	chrVII	951894	952307	0	361.646	0.484357	0.199442	2.42857	0.0151586	0.255182	0.0150692	402.499	418.359	374.427	335.992	429.758	318.42	252.068	398.429	382.875	285.244	Protein of unknown function; overexpression bypasses need for Spo12p, but not required for meiosis; BNS1 has a paralog, SPO12, that arose from the whole genome duplication	GO:0003674,GO:0005575,GO:0007126
YHR152W	SPO12	chrVIII	401434	401955	0	1702.16	0.350813	0.144059	2.4352	0.0148834	0.255182	0.0148834	1679.79	1805.08	1649.61	2097.63	1999.55	1211.66	1471.78	1711.5	2048.59	1341.72	Nucleolar protein of unknown function; positive regulator of mitotic exit; involved in regulating release of Cdc14p from the nucleolus in early anaphase, may play similar role in meiosis; SPO12 has a paralog, BNS1, that arose from the whole genome duplication	GO:0000278,GO:0003674,GO:0005634,GO:0005730,GO:0007096,GO:0007127
YIL099W	SGA1	chrIX	178004	179653	0	112.09	-0.784427	0.323094	-2.42786	0.0151882	0.255182	0.0151882	104.696	113.07	60.9533	103.025	82.1735	188.428	132.283	92.9066	92.5994	160.356	Intracellular sporulation-specific glucoamylase; involved in glycogen degradation; induced during starvation of a/a diploids late in sporulation, but dispensable for sporulation	GO:0000324,GO:0004339,GO:0005628,GO:0005980
YIR038C	GTT1	chrIX	423809	424513	1	2355.83	-0.328158	0.140289	-2.33916	0.0193273	0.255182	0.0150932	2326.59	2028.8	2358.79	2026.16	2133.68	2620.11	2996.69	2238.06	2079.92	2808.4	ER associated glutathione S-transferase capable of homodimerization; expression induced during the diauxic shift and throughout stationary phase; functional overlap with Gtt2p, Grx1p, and Grx2p	GO:0004364,GO:0004602,GO:0005739,GO:0005741,GO:0005783,GO:0005886,GO:0006749
YLR206W	ENT2	chrXII	554578	556419	0	2769.75	-0.294365	0.137235	-2.14496	0.0319557	0.255182	0.0151214	2697.68	2473	2398.46	2950.61	2680.56	3305.84	2882.11	2523.05	2815.58	3093.98	Epsin-like protein required for endocytosis and actin patch assembly; functionally redundant with Ent1p; contains clathrin-binding motif at C-terminus; ENT2 has a paralog, ENT1, that arose from the whole genome duplication	GO:0000147,GO:0006897,GO:0007015,GO:0030276,GO:0030479,GO:0043332
YLR342W-A	YLR342W-A	chrXII	815810	815983	0	111.138	0.851185	0.358195	2.37632	0.0174865	0.255182	0.0149536	101.206	138.915	173.185	73.3243	137.9	93.0215	60.4129	137.769	105.612	76.7172	Putative protein of unknown function	GO:0003674,GO:0005575,GO:0008150
YLR416C	YLR416C	chrXII	954491	954889	1	16.2983	-1.70463	0.687615	-2.47904	0.0131736	0.255182	0.0152	3.48988	12.9223	10.6426	12.066	15.1124	20.2739	39.5809	9.01827	13.5892	29.9274	Dubious open reading frame; unlikely to encode a functional protein, based on available experimental and comparative sequence data	GO:0003674,GO:0005575,GO:0008150
YMR094W	CTF13	chrXIII	455825	457261	0	148.684	-0.606743	0.249377	-2.43304	0.0149728	0.255182	0.0149728	114.003	127.608	116.101	180.99	137.9	202.739	161.448	119.237	159.445	182.094	Subunit of the CBF3 complex; CBF3 binds to the CDE III element of centromeres, bending the DNA upon binding, and may be involved in sister chromatid cohesion during mitosis	GO:0000778,GO:0000921,GO:0008301,GO:0019237,GO:0031518,GO:0051382
YOL055C	THI20	chrXV	224420	226075	1	7690.83	0.350152	0.149393	2.34382	0.0190873	0.255182	0.0149057	7913.88	8651.47	7478.87	8753.43	8463.87	5479.92	7094.35	8014.74	8608.65	6287.14	Trifunctional enzyme of thiamine biosynthesis, degradation and salvage; has hydroxymethylpyrimidine (HMP) kinase, HMP-phosphate (HMP-P) kinase and thiaminase activities; member of a gene family with THI21 and THI22; HMP and HMP-P kinase activity redundant with Thi21p	GO:0005829,GO:0008902,GO:0008972,GO:0009228,GO:0009230,GO:0050334
YKR106W	GEX2	chrXI	661442	663289	0	359.648	-0.454559	0.187518	-2.42408	0.0153474	0.255369	0.0152569	336.192	285.906	278.644	413.957	380.643	447.219	374.977	300.247	397.3	411.098	Proton:glutathione antiporter; localized to the vacuolar and plasma membranes; expressed at a very low level; potential role in resistance to oxidative stress and modulation of the PKA pathway; GEX2 has a paralog, GEX1, that arose from a segmental duplication	GO:0005774,GO:0005886,GO:0015299,GO:0016021,GO:0034775
YBL009W	ALK2	chrII	207194	209224	0	1019.09	0.339852	0.145789	2.33113	0.0197466	0.256485	0.0154055	1037.66	1062.86	978.155	1273.43	1158.93	862.238	760.369	1026.22	1216.18	811.304	Protein kinase; along with its paralog, ALK1, required for proper spindle positioning and nuclear segregation following mitotic arrest, proper organization of cell polarity factors in mitosis, proper localization of formins and polarity factors, and survival in cells that activate spindle assembly checkpoint; phosphorylated in response to DNA damage; ALK2 has a paralog, ALK1, that arose from the …	GO:0004672,GO:0004674,GO:0005575,GO:0006468,GO:0007067,GO:0007126
YLR202C	YLR202C	chrXII	550194	550636	1	282.675	0.548165	0.2317	2.36584	0.0179893	0.256485	0.0153835	266.394	336.787	359.915	233.895	341.917	224.206	215.612	321.032	287.906	219.909	Dubious open reading frame; unlikely to encode a functional protein, based on available experimental and comparative sequence data; partially overlaps the verified ORF YLR201C; ORF contains a putative intron	GO:0003674,GO:0005575,GO:0008150
YHR102W	KIC1	chrVIII	316572	319814	0	1294.04	-0.384486	0.158927	-2.41927	0.0155517	0.257549	0.0155517	1273.81	1176.74	1079.74	1372.74	1084.31	1483.57	1587.4	1176.76	1228.53	1535.49	Protein kinase of the PAK/Ste20 family, required for cell integrity; physically interacts with Cdc31p (centrin), which is a component of the spindle pole body; part of the RAM network that regulates cellular polarity and morphogenesis	GO:0000131,GO:0000902,GO:0004674,GO:0005515,GO:0005737,GO:0005933,GO:0007118,GO:0016301,GO:0031505,GO:0043332
YMR295C	YMR295C	chrXIII	858297	858890	1	2955.75	-0.274699	0.128689	-2.13459	0.0327947	0.257549	0.0155184	3089.71	2660.38	2777.73	2647.1	2639.94	3445.37	3429.99	2842.6	2643.52	3437.68	Protein of unknown function that associates with ribosomes; green fluorescent protein (GFP)-fusion protein localizes to the cell periphery and bud; not an essential gene; protein abundance increases in response to DNA replication stress; YMR295C has a paralog, YGR273C, that arose from the whole genome duplication	GO:0003674,GO:0005840,GO:0005933,GO:0008150,GO:0043332
YBR109W-A	YBR109W-A	chrII	458608	458832	0	21.1221	-1.42506	0.593363	-2.40166	0.0163207	0.261298	0.0163207	15.1228	9.69172	14.5127	12.066	26.4466	42.933	27.0816	13.1091	19.2563	35.0073	Putative protein of unknown function; questionable ORF from MIPS	GO:0003674,GO:0005575,GO:0008150
YDR092W	UBC13	chrIV	629876	630605	0	1937.96	0.424576	0.161081	2.6358	0.00839404	0.261298	0.0161674	1861.27	2135.41	2051.13	2019.67	2494.48	1347.62	1656.15	2015.93	2257.08	1501.88	E2 ubiquitin-conjugating enzyme; involved in the error-free DNA postreplication repair pathway; interacts with Mms2p to assemble ubiquitin chains at the Ub Lys-63 residue; DNA damage triggers redistribution from the cytoplasm to the nucleus	GO:0000209,GO:0004842,GO:0005634,GO:0005737,GO:0006301,GO:0006513,GO:0010994,GO:0031371
YDR475C	JIP4	chrIV	1407464	1410094	1	1384.68	-0.348483	0.128666	-2.70843	0.00676024	0.261298	0.0161309	1264.5	1289.81	1260.67	1353.25	1286.44	1577.79	1660.31	1271.66	1319.85	1619.05	Protein of unknown function; previously annotated as two separate ORFs, YDR474C and YDR475C, which were merged as a result of corrections to the systematic reference sequence; JIP4 has a paralog, YOR019W, that arose from the whole genome duplication	GO:0003674,GO:0005575,GO:0008150
YER131W	RPS26B	chrV	423591	424311	0	21848	0.264279	0.109914	2.40443	0.0161977	0.261298	0.0161977	22165.4	22910.4	22614.6	23889.8	23782.1	18551.8	19021.7	22563.5	23836	18786.8	Protein component of the small (40S) ribosomal subunit; homologous to mammalian ribosomal protein S26, no bacterial homolog; RPS26B has a paralog, RPS26A, that arose from the whole genome duplication	GO:0002181,GO:0003735,GO:0006407,GO:0022627
YGL228W	SHE10	chrVII	67598	69331	0	3005.18	-0.372996	0.161443	-2.31039	0.0208665	0.261298	0.0158638	2924.52	2592.53	2834.81	2687.94	2785.4	4180	3031.06	2783.95	2736.67	3605.53	Protein involved in outer spore wall assembly; likely involved directly in dityrosine layer assembly; putative GPI-anchored protein; overexpression causes growth arrest; SHE10 has a paralog, OSW7/YFR039C, that arose from the whole genome duplication and deletion of both SHE10 and OWS7 results in reduced dityrosine fluorescence from the spore wall relative to other mutants	GO:0003674,GO:0005575,GO:0030476
YJL196C	ELO1	chrX	67850	68782	1	6087.49	0.450904	0.195427	2.30728	0.0210392	0.261298	0.0159951	5696.64	6721.21	7326.97	5387.94	7848.04	5495.42	4136.2	6581.61	6617.99	4815.81	Elongase I, medium-chain acyl elongase; catalyzes carboxy-terminal elongation of unsaturated C12-C16 fatty acyl-CoAs to C16-C18 fatty acids; ELO1 has a paralog, ELO2, that arose from the whole genome duplication	GO:0009922,GO:0016020,GO:0016021,GO:0019368
YKL100C	YKL100C	chrXI	253697	255460	1	2618.91	-0.3693	0.174507	-2.11625	0.0343233	0.261298	0.0162418	2354.5	2356.7	2691.62	2120.83	2432.15	3750.67	2625.88	2467.61	2276.49	3188.28	Intramembrane aspartyl protease of the perinuclear ER membrane; acts in a branch of ER-associated degradation (ERAD) that degrades functional proteins rather than misfolded proteins; regulates abundance of high-affinity plasma membrane transporters during the starvation response; has a presenilin fold; member of the GxGD family of intramembrane proteases; closest human homolog is signal peptide p…	GO:0009267,GO:0016021,GO:0042500,GO:0051603,GO:1990578
YLR190W	MMR1	chrXII	535214	536689	0	1644.28	-0.497087	0.180665	-2.75143	0.00593365	0.261298	0.0162851	1528.57	1440.03	1530.6	1317.05	1459.29	2544.97	1689.48	1499.73	1388.17	2117.23	Phosphorylated protein of the mitochondrial outer membrane; localizes only to mitochondria of the bud; interacts with Myo2p to mediate mitochondrial distribution to buds; mRNA is targeted to the bud via the transport system involving She2p	GO:0000001,GO:0000131,GO:0003674,GO:0005739,GO:0005741,GO:0005933,GO:0005935
YLR214W	FRE1	chrXII	568567	570627	0	4228.85	-0.395939	0.171412	-2.30987	0.0208955	0.261298	0.0163178	4399.57	3535.86	4447.65	2919.98	3437.12	6162.08	4699.71	4127.7	3178.55	5430.89	Ferric reductase and cupric reductase; reduces siderophore-bound iron and oxidized copper prior to uptake by transporters; expression induced by low copper and iron levels	GO:0000293,GO:0005886,GO:0006826,GO:0015677,GO:0016021
YLR467W	YRF1-5	chrXII	1072508	1077898	0	3788.43	-0.272406	0.128701	-2.11657	0.034296	0.261298	0.0162289	3616.68	3370.29	3484.98	4040.26	3575.02	4393.48	4038.29	3490.65	3807.64	4215.88	Helicase encoded by the Y' element of subtelomeric regions; highly expressed in the mutants lacking the telomerase component TLC1; potentially phosphorylated by Cdc28p	GO:0000722,GO:0003678,GO:0005634
YMR084W	YMR084W	chrXIII	436628	437416	0	50.8175	-0.991554	0.402912	-2.46097	0.0138563	0.261298	0.0159876	36.0621	38.7669	49.3431	40.8388	25.5021	103.755	61.4545	41.3907	33.1705	82.6046	Putative protein of unknown function; YMR084W and adjacent ORF YMR085W are merged in related strains, and together are paralogous to glutamine-fructose-6-phosphate amidotransferase GFA1	GO:0003674,GO:0005575,GO:0008150
YNL192W	CHS1	chrXIV	276502	279897	0	5150.37	-0.350757	0.145638	-2.40841	0.0160221	0.261298	0.0160221	5730.38	4663.33	5213.92	3737.68	3439.95	7161.46	6105.87	5202.54	3588.82	6633.67	Chitin synthase I; requires activation from zymogenic form in order to catalyze the transfer of N-acetylglucosamine (GlcNAc) to chitin; required for repairing the chitin septum during cytokinesis; transcription activated by mating factor	GO:0004100,GO:0005886,GO:0007109,GO:0016021,GO:0045009
YOR289W	YOR289W	chrXV	853357	854112	0	758.034	-0.530362	0.210801	-2.51594	0.0118715	0.261298	0.0159914	711.935	558.889	793.36	620.008	634.719	1192.58	794.742	688.061	627.364	993.663	Putative protein of unknown function; transcription induced by the unfolded protein response; green fluorescent protein (GFP)-fusion protein localizes to both the cytoplasm and the nucleus	GO:0003674,GO:0005634,GO:0005737,GO:0008150
YBL047C	EDE1	chrII	127895	132040	1	5503.35	-0.28476	0.135017	-2.10907	0.0349388	0.263873	0.016533	5593.11	5051.81	5105.56	5436.21	4546.93	6269.41	6520.43	5250.16	4991.57	6394.92	Scaffold protein involved in the formation of early endocytic sites; putative regulator of cytokinesis; homo-oligomerization is required for localization to and organization of endocytic sites; has a network of interactions with other endocytic proteins; binds membranes in a ubiquitin-dependent manner; may also bind ubiquitinated membrane-associated proteins; interacts with Cmk2 and functions ups…	GO:0005737,GO:0005934,GO:0005935,GO:0006897,GO:0030479,GO:0030968,GO:0032467,GO:0043130,GO:0043332,GO:0044396
YOR092W	ECM3	chrXV	495127	496968	0	1336.56	-0.354311	0.147863	-2.3962	0.0165658	0.263873	0.0165658	1297.07	1262.35	1283.89	1100.79	1135.32	1823.46	1453.03	1281.1	1118.05	1638.25	Non-essential protein of unknown function; involved in signal transduction and the genotoxic response; induced rapidly in response to treatment with 8-methoxypsoralen and UVA irradiation; relocalizes from ER to cytoplasm upon DNA replication stress; ECM3 has a paralog, YNL095C, that arose from the whole genome duplication	GO:0005737,GO:0005783,GO:0008150,GO:0016021,GO:0016887
YGR085C	RPL11B	chrVII	648383	648907	1	20853.6	0.320139	0.139093	2.30161	0.021357	0.264989	0.0166782	21462.8	22643.9	23695.3	18603.9	23362.8	17796.9	18409.3	22600.7	20983.4	18103.1	Ribosomal 60S subunit protein L11B; expressed at half the level of Rpl11Ap; involved in ribosomal assembly; depletion causes degradation of 60S proteins and RNA; homologous to mammalian ribosomal protein L11 and bacterial L5; RPL11B has a paralog, RPL11A, that arose from the whole genome duplication	GO:0000027,GO:0002181,GO:0003735,GO:0022625
YDR083W	RRP8	chrIV	612073	613251	0	1519.73	0.350418	0.127799	2.74194	0.0061078	0.265008	0.016763	1664.67	1691.2	1590.59	1581.58	1523.52	1285.6	1300.96	1648.82	1552.55	1293.28	Nucleolar S-adenosylmethionine-dependent rRNA methyltransferase; methylates adenine (m1A) of the large subunit (LSU) rRNA at position 645; involved in pre-rRNA cleavage at site A2; mutation is synthetically lethal with a gar1 mutation; deletion disrupts telomere maintenance by influencing the expression of neighboring gene STN1	GO:0005730,GO:0006364,GO:0016433,GO:0031167,GO:0042273
YER158W-A	YER158W-A	chrV	491487	491702	0	331.82	0.629062	0.269648	2.3329	0.0196532	0.265008	0.0168064	311.762	382.823	384.102	297.01	480.762	293.376	172.906	359.563	388.886	233.141	Dubious open reading frame; unlikely to encode a functional protein, based on available experimental and comparative sequence data; identified by gene-trapping, microarray-based expression analysis, and genome-wide homology searching	GO:0003674,GO:0005575,GO:0008150
YNR034W-A	YNR034W-A	chrXIV	692561	692857	0	548.931	-0.702865	0.281239	-2.49917	0.0124485	0.265008	0.0167686	374.58	371.516	573.735	395.394	694.224	878.934	554.132	439.944	544.809	716.533	Putative protein of unknown function; expression is regulated by Msn2p/Msn4p; YNR034W-A has a paralog, YCR075W-A, that arose from the whole genome duplication	GO:0003674,GO:0005737,GO:0008150
YER008C	SEC3	chrV	167808	171818	1	1655.36	-0.386861	0.147566	-2.6216	0.00875172	0.265126	0.0168563	1608.83	1512.72	1383.54	1587.15	1567.91	2151.42	1775.93	1501.7	1577.53	1963.68	Subunit of the exocyst complex; the exocyst mediates polarized targeting and tethering of post-Golgi secretory vesicles to sites of exocytosis prior to SNARE-mediated fusion; PtdIns[4,5]P2-binding protein that localizes to exocytic sites in a Rho1p-dependent, actin-independent manner, targeting and anchoring the exocyst to the plasma membrane with Exo70p; direct GTP Rho1p effector; required for E…	GO:0000131,GO:0000145,GO:0001927,GO:0005546,GO:0005628,GO:0005737,GO:0005934,GO:0005935,GO:0006887,GO:0006893,GO:0017049,GO:0043332,GO:0048309,GO:0051601,GO:0090522
YDL085W	NDE2	chrIV	303211	304848	0	161.451	-0.571254	0.234607	-2.43494	0.0148942	0.269624	0.0171853	168.677	149.414	136.419	128.085	98.2304	217.05	232.277	151.504	113.158	224.664	Mitochondrial external NADH dehydrogenase; catalyzes the oxidation of cytosolic NADH; Nde1p and Nde2p are involved in providing the cytosolic NADH to the mitochondrial respiratory chain; NDE2 has a paralog, NDE1, that arose from the whole genome duplication	GO:0003954,GO:0005739,GO:0006116,GO:0019655
YIL177C	YIL177C	chrIX	483	6147	1	911.367	-0.373602	0.157087	-2.37831	0.0173921	0.271529	0.0173921	893.409	738.993	774.01	991.27	904.853	1103.14	973.898	802.137	948.061	1038.52	Putative Y' element ATP-dependent helicase	GO:0004386,GO:0005575,GO:0008150
YPL057C	SUR1	chrXVI	451909	453057	1	2909.79	-0.439367	0.184812	-2.37736	0.0174368	0.271529	0.0174368	2830.29	2480.27	3024.44	2347.3	2150.68	4537.78	2997.73	2778.34	2248.99	3767.75	Mannosylinositol phosphorylceramide (MIPC) synthase catalytic subunit; forms a complex with regulatory subunit Csg2p; function in sphingolipid biosynthesis is overlapping with that of Csh1p; SUR1 has a paralog, CSH1, that arose from the whole genome duplication	GO:0000030,GO:0000329,GO:0005622,GO:0006675,GO:0006688,GO:0016021,GO:0016757,GO:0030148
YPR188C	MLC2	chrXVI	911988	912479	1	1213.93	0.346122	0.145588	2.37742	0.0174343	0.271529	0.0174343	1207.5	1231.66	1393.22	1262.29	1393.17	965.993	1043.68	1277.46	1327.73	1004.84	Regulatory light chain for the type II myosin Myo1p; binds to an IQ motif of Myo1p, localization to the bud neck depends on Myo1p; involved in the disassembly of the Myo1p ring	GO:0000142,GO:0000916,GO:0016460,GO:0045159
YER144C	UBP5	chrV	457806	460223	1	1891.06	-0.443554	0.170061	-2.60821	0.00910166	0.272306	0.0175303	2171.87	1658.9	1806.35	1392.23	1099.42	2695.24	2413.39	1879.04	1245.83	2554.31	Putative ubiquitin-specific protease; concentrates at the bud neck; UBP5 has a paralog, DOA4, that arose from the whole genome duplication	GO:0000131,GO:0004843,GO:0005935,GO:0016579
YLL064C	PAU18	chrXII	13083	13445	1	214.434	-0.589102	0.248709	-2.36864	0.0178537	0.272522	0.0177484	188.453	159.913	233.17	136.439	200.239	308.879	273.941	193.846	168.339	291.41	Protein of unknown function; member of the seripauperin multigene family encoded mainly in subtelomeric regions; identical to Pau6p	GO:0003674,GO:0005575,GO:0008150
YMR245W	YMR245W	chrXIII	758563	759183	0	240.852	0.616537	0.260322	2.36836	0.0178672	0.272522	0.0177618	214.046	318.211	288.319	199.553	307.914	194.391	163.531	273.525	253.734	178.961	Dubious open reading frame; unlikely to encode a functional protein, based on available experimental and comparative sequence data	GO:0003674,GO:0005575,GO:0008150
YOR032C	HMS1	chrXV	389771	391075	1	211.882	-0.537413	0.226379	-2.37395	0.017599	0.272522	0.017599	176.821	172.836	232.203	184.703	153.957	264.754	297.898	193.953	169.33	281.326	bHLH protein with similarity to myc-family transcription factors; overexpression confers hyperfilamentous growth and suppresses the pseudohyphal filamentation defect of a diploid mep1 mep2 homozygous null mutant	GO:0003700,GO:0005575,GO:0007124
YOR137C	SIA1	chrXV	581813	583681	1	1226.73	-0.372423	0.157023	-2.37178	0.0177026	0.272522	0.0177026	1194.7	1089.51	1240.35	1061.81	958.691	1691.08	1350.96	1174.85	1010.25	1521.02	Protein of unassigned function; involved in activation of the Pma1p plasma membrane H+-ATPase by glucose; contains peptide signal for membrane localization	GO:0003674,GO:0005575,GO:0015992
YOR149C	SMP3	chrXV	609838	611388	1	747.877	-0.523852	0.223112	-2.34793	0.0188779	0.272522	0.0176985	702.629	630.769	680.161	720.248	570.492	1223.59	707.248	671.186	645.37	965.419	Alpha 1,2-mannosyltransferase; involved in glycosyl phosphatidyl inositol (GPI) biosynthesis; required for addition of the fourth, side branching mannose to the GPI core structure	GO:0004584,GO:0005783,GO:0006276,GO:0006506,GO:0016021
YBL029W	YBL029W	chrII	166134	167264	0	618.066	0.374794	0.159957	2.3431	0.0191245	0.273089	0.0179297	607.239	664.69	626.948	674.769	775.453	512.811	464.554	632.959	725.111	488.683	Non-essential protein of unknown function	GO:0003674,GO:0005634,GO:0005737,GO:0008150
YPR024W	YME1	chrXVI	610481	612724	0	2736.92	-0.367626	0.161624	-2.27458	0.0229313	0.273089	0.0179076	2909.4	2433.43	2478.77	2630.39	1980.66	3333.27	3392.5	2607.2	2305.53	3362.88	Catalytic subunit of the i-AAA protease complex; complex is located in the mitochondrial inner membrane; responsible for degradation of unfolded or misfolded mitochondrial gene products; serves as a nonconventional translocation motor to pull PNPase into the intermembrane space; also has a role in intermembrane space protein folding; mutation causes an elevated rate of mitochondrial turnover	GO:0004176,GO:0005739,GO:0005743,GO:0006457,GO:0006515,GO:0031942,GO:0045041,GO:0051604
YPR159W	KRE6	chrXVI	857583	859745	0	7319.6	-0.342645	0.15055	-2.27596	0.0228486	0.273089	0.0178431	7354.34	6593.6	7236.02	6343.94	5800.31	10141.7	7767.22	7061.32	6072.13	8954.48	Type II integral membrane protein; required for beta-1,6 glucan biosynthesis; putative beta-glucan synthase; localizes to ER, plasma membrane, sites of polarized growth and secretory vesicles; functionally redundant with Skn1p; KRE6 has a paralog, SKN1, that arose from the whole genome duplication	GO:0005886,GO:0006078,GO:0015926,GO:0016021,GO:0030133,GO:0030176,GO:0030427,GO:0031505
YOR192C	THI72	chrXV	698768	700567	1	166.029	-0.564475	0.23876	-2.3642	0.0180693	0.273596	0.0180693	166.351	129.223	148.997	136.439	143.567	248.057	189.572	148.19	140.003	218.814	Transporter of thiamine or related compound; contributes to uptake of 5-aminoimidazole-4-carboxamide-1-beta-D-ribofuranoside (acadesine); shares sequence similarity with Thi7p	GO:0005215,GO:0015888,GO:0016020,GO:0016021,GO:1903088,GO:1903089
YOR338W	YOR338W	chrXV	956898	957989	0	337.962	-0.574069	0.243096	-2.3615	0.0182014	0.273596	0.018094	337.355	256.023	315.409	312.788	244.631	342.271	557.257	302.929	278.71	449.764	Putative protein of unknown function; YOR338W transcription is regulated by Azf1p and its transcript is a specific target of the G protein effector Scp160p; identified as being required for sporulation in a high-throughput mutant screen; YOR338W has a paralog, FUN19, that arose from the whole genome duplication	GO:0003674,GO:0005575,GO:0030437,GO:0045944
YPR170C	YPR170C	chrXVI	882983	883318	1	96.6724	-0.752118	0.31841	-2.36211	0.0181712	0.273596	0.018064	108.186	67.0344	97.7187	52.9048	45.3371	183.658	121.867	90.9798	49.121	152.763	Dubious open reading frame; unlikely to encode a functional protein, based on available experimental and comparative sequence data; partially overlaps ORFs YPR169W-A and YPR170W-B	GO:0003674,GO:0005575,GO:0008150
YLR172C	DPH5	chrXII	501260	502162	1	3039.52	0.293252	0.135308	2.1673	0.0302121	0.274521	0.0181991	3171.14	3069.04	3342.75	3357.14	3124.48	2393.51	2818.57	3194.31	3240.81	2606.04	Methyltransferase required for synthesis of diphthamide; diphthamide is a modified histidine residue of translation elongation factor 2 (Eft1p or Eft2p); not essential for viability; GFP-Dph5p fusion protein localizes to the cytoplasm	GO:0004164,GO:0005737,GO:0017183
YLR130C	ZRT2	chrXII	402794	404062	1	5029.56	-0.333962	0.161622	-2.06632	0.0387985	0.276275	0.0183595	4819.52	4568.03	5123.94	3943.73	4556.38	7027.89	5167.39	4837.17	4250.05	6097.64	Low-affinity zinc transporter of the plasma membrane; transcription is induced under low-zinc conditions by the Zap1p transcription factor	GO:0000007,GO:0005886,GO:0006831,GO:0016021
YGL183C	MND1	chrVII	156543	157285	1	74.6512	-0.754539	0.313608	-2.406	0.0161284	0.278694	0.0186093	70.9609	60.5732	84.1736	37.1262	27.3912	128.799	113.535	71.9026	32.2587	121.167	Protein required for recombination and meiotic nuclear division; forms a complex with Hop2p, which is involved in chromosome pairing and repair of meiotic double-strand breaks	GO:0000794,GO:0003690,GO:0005515,GO:0005634,GO:0007131
YKL157W	APE2	chrXI	154991	158232	0	6211.66	-0.31275	0.132862	-2.35396	0.0185747	0.278694	0.0185747	5936.28	5486.32	6470.72	5079.79	5692.64	7545.48	7270.38	5964.44	5386.22	7407.93	Aminopeptidase yscII; may have a role in obtaining leucine from dipeptide substrates; APE2 has a paralog, AAP1, that arose from the whole genome duplication	GO:0005576,GO:0005739,GO:0030287,GO:0043171,GO:0070006
YBR199W	KTR4	chrII	618909	620303	0	4363.8	-0.371703	0.181663	-2.04611	0.0407453	0.27933	0.0192807	3673.68	3717.58	4460.23	4396.67	4073.73	6115.57	4109.12	3950.5	4235.2	5112.34	Putative mannosyltransferase involved in protein glycosylation; member of the KRE2/MNT1 mannosyltransferase family of type II membrane proteins with a short cytoplasmic N-terminus, a membrane-spanning region and a highly conserved catalytic lumenal domain	GO:0000030,GO:0005794,GO:0006487
YBR214W	SDS24	chrII	651415	652998	0	1563.58	-0.455215	0.168959	-2.69423	0.00705521	0.27933	0.0193633	1485.52	1362.49	1428.05	1554.66	1208.04	1713.74	2192.57	1425.36	1381.35	1953.16	Protein involved in cell separation during budding; one of two S. cerevisiae homologs (Sds23p and Sds24p) of the S. pombe Sds23 protein, which is implicated in APC/cyclosome regulation; may play an indirect role in fluid-phase endocytosis; protein abundance increases in response to DNA replication stress; SDS24 has a paralog, SDS23, that arose from the whole genome duplication	GO:0000920,GO:0003674,GO:0005737,GO:0006897
YDR169C	STB3	chrIV	792348	793889	1	1066.59	-0.365162	0.155464	-2.34885	0.0188317	0.27933	0.0188317	1048.13	940.904	934.617	1125.85	907.686	1215.24	1293.67	974.549	1016.77	1254.46	Ribosomal RNA processing element (RRPE)-binding protein; involved in the glucose-induced transition from quiescence to growth; restricted to nucleus in quiescent cells, released into cytoplasm after glucose repletion; binds Sin3p; relative distribution to the nucleus increases upon DNA replication stress	GO:0000432,GO:0005634,GO:0005737,GO:0043565
YDR411C	DFM1	chrIV	1293369	1294394	1	2343.1	-0.378345	0.175787	-2.15229	0.0313742	0.27933	0.0188991	2120.68	1994.07	2476.83	1886.94	2210.18	3297.49	2415.47	2197.19	2048.56	2856.48	Endoplasmic reticulum (ER) localized protein; involved in ER-associated protein degradation (ERAD), ER stress, and homeostasis; interacts with components of ERAD-L and ERAD-C and Cdc48p; derlin-like family member similar to Der1p	GO:0000837,GO:0000839,GO:0003674,GO:0005783,GO:0016021,GO:0030433,GO:0030968
YDR482C	CWC21	chrIV	1420431	1420838	1	1050.43	-0.318414	0.141828	-2.24506	0.0247641	0.27933	0.01932	1085.35	995.824	1002.34	833.483	874.628	1202.12	1359.29	1027.84	854.056	1280.71	Protein involved in RNA splicing by the spliceosome; component of a complex containing Cef1p; interacts genetically with ISY1 and BUD13; may bind RNA; has similarity to S. pombe Cwf21p	GO:0000398,GO:0003674,GO:0005684
YFR001W	LOC1	chrVI	149110	149724	0	1862.92	0.427941	0.158605	2.69815	0.00697257	0.27933	0.0191365	1911.29	2023.95	2029.84	1830.32	2287.63	1631.45	1325.96	1988.36	2058.98	1478.71	Nuclear protein involved in asymmetric localization of ASH1 mRNA; binds double-stranded RNA in vitro; constituent of 66S pre-ribosomal particles; required at post-transcriptional step for efficient retrotransposition; absence results in decreased Ty1 Gag:GFP protein levels; relocalizes from nucleus to cytoplasm upon DNA replication stress	GO:0000447,GO:0000472,GO:0000480,GO:0003729,GO:0005634,GO:0005730,GO:0005737,GO:0008298,GO:0030687,GO:0042273
YGL126W	SCS3	chrVII	270997	272139	0	4806.54	-0.598744	0.255735	-2.34127	0.0192185	0.27933	0.0192185	4128.53	3438.94	5947.3	2445.69	4040.67	8134.61	5510.07	4504.92	3243.18	6822.34	Protein required for inositol prototrophy; required for normal ER membrane biosynthesis; ortholog of the FIT family of proteins involved in triglyceride droplet biosynthesis and homologous to human FIT2; disputed role in the synthesis of inositol phospholipids from inositol	GO:0003674,GO:0005783,GO:0006644,GO:0008654,GO:0016021
YGL140C	YGL140C	chrVII	241353	245012	1	2164.29	-0.448859	0.183324	-2.44845	0.0143473	0.27933	0.0193263	2039.25	1885.85	2068.54	1891.58	1809.71	3317.77	2137.37	1997.88	1850.64	2727.57	Putative protein of unknown function; non-essential gene; contains multiple predicted transmembrane domains	GO:0003674,GO:0008150,GO:0016021
YIL173W	VTH1	chrIX	11492	16141	0	679.5	-0.376468	0.167475	-2.24791	0.0245822	0.27933	0.0191781	664.24	591.195	604.695	684.05	602.606	892.052	717.664	620.043	643.328	804.858	Putative membrane glycoprotein; has strong similarity to Vth2p and Pep1p/Vps10p; may be involved in vacuolar protein sorting	GO:0005048,GO:0005768,GO:0006896,GO:0016021
YKL129C	MYO3	chrXI	196349	200167	1	1889.08	-0.42199	0.163661	-2.57843	0.00992494	0.27933	0.019116	1878.72	1760.66	1644.77	1775.56	1446.06	2076.29	2641.5	1761.38	1610.81	2358.89	One of two type I myosins; localizes to actin cortical patches; deletion of MYO3 has little effect on growth, but myo3 myo5 double deletion causes severe defects in growth and actin cytoskeleton organization; MYO3 has a paralog, MYO5, that arose from the whole genome duplication	GO:0000146,GO:0006887,GO:0006897,GO:0006970,GO:0007121,GO:0030479,GO:0031505,GO:0051666
YMR020W	FMS1	chrXIII	315377	316903	0	1551.8	-0.377737	0.160689	-2.35073	0.0187365	0.27933	0.0187365	1544.85	1256.69	1654.45	1343.04	1205.21	2017.85	1840.51	1485.33	1274.13	1929.18	Polyamine oxidase; converts spermine to spermidine, which is required for the essential hypusination modification of translation factor eIF-5A; also involved in pantothenic acid biosynthesis	GO:0005737,GO:0015940,GO:0046208,GO:0046592
YMR161W	HLJ1	chrXIII	577718	578392	0	993.17	-0.322607	0.137951	-2.33856	0.019358	0.27933	0.019358	938.777	956.249	917.202	944.862	850.071	1187.81	1157.22	937.409	897.466	1172.52	Co-chaperone for Hsp40p; anchored in the ER membrane; with its homolog Ydj1p promotes ER-associated protein degradation (ERAD) of integral membrane substrates; similar to E. coli DnaJ	GO:0001671,GO:0005783,GO:0005789,GO:0030433
YNL043C	YNL043C	chrXIV	545589	545909	1	348.972	-0.467281	0.204329	-2.2869	0.0222016	0.27933	0.0189856	335.028	275.406	401.518	256.171	242.742	491.344	440.598	337.317	249.457	465.971	Dubious open reading frame; unlikely to encode a functional protein, based on available experimental and comparative sequence data; partially overlaps the verified gene YIP3/YNL044W	GO:0003674,GO:0005575,GO:0008150
YNL110C	NOP15	chrXIV	417826	418488	1	2339.58	0.295744	0.125951	2.34809	0.0188697	0.27933	0.0188697	2381.26	2561.04	2421.68	2422.49	2590.83	1949.87	2049.87	2454.66	2506.66	1999.87	Constituent of 66S pre-ribosomal particles; involved in 60S ribosomal subunit biogenesis; localizes to both nucleolus and cytoplasm	GO:0000915,GO:0003674,GO:0005634,GO:0005730,GO:0030687,GO:0042273
YOL077C	BRX1	chrXV	185848	186723	1	2672.56	0.301031	0.140501	2.14256	0.0321488	0.27933	0.0193657	2723.27	2762.95	2607.45	3400.76	2834.51	2065.55	2313.4	2697.89	3117.64	2189.48	Nucleolar protein; constituent of 66S pre-ribosomal particles; depletion leads to defects in rRNA processing and a block in the assembly of large ribosomal subunits; possesses a sigma(70)-like RNA-binding motif	GO:0000027,GO:0005730,GO:0008097,GO:0030687,GO:0042134
YPL142C	YPL142C	chrXVI	282686	283003	1	846.689	0.45503	0.202262	2.24971	0.0244673	0.27933	0.0190885	953.9	1071.74	1032.34	524.408	856.682	759.676	728.08	1019.33	690.545	743.878	Dubious open reading frame; unlikely to encode a functional protein, based on available experimental and comparative sequence data; completely overlaps the verified ORF RPL33A/YPL143W, a component of the large (60S) ribosomal subunit	GO:0003674,GO:0005575,GO:0008150
YDL246C	SOR2	chrIV	8683	9756	1	241.525	-0.53053	0.222239	-2.3872	0.0169772	0.280953	0.0195886	229.169	193.834	272.838	155.93	169.07	370.893	298.94	231.947	162.5	334.917	Protein of unknown function; protein sequence is 99% identical to the Sor1p sorbitol dehydrogenase; computational analysis of large-scale protein-protein interaction data also suggests a role in fructose or mannose metabolism	GO:0003939,GO:0005575,GO:0019318
YDR062W	LCB2	chrIV	576474	578159	0	5137.23	-0.348975	0.171433	-2.03564	0.0417867	0.280953	0.0197735	4963.77	4554.3	5376.47	3873.19	4545.04	7385.67	5262.17	4964.85	4209.12	6323.92	Component of serine palmitoyltransferase; responsible along with Lcb1p for the first committed step in sphingolipid synthesis, which is the condensation of serine with palmitoyl-CoA to form 3-ketosphinganine	GO:0004758,GO:0017059,GO:0030148,GO:0035339
YFL010C	WWM1	chrVI	115108	115743	1	3304.21	-0.346783	0.15567	-2.22768	0.025902	0.280953	0.0196921	3197.89	2732.26	3207.3	3454.59	2792.95	3580.14	4164.32	3045.82	3123.77	3872.23	WW domain containing protein of unknown function; binds to Mca1p, a caspase-related protease that regulates H2O2-induced apoptosis; overexpression causes G1 phase growth arrest and clonal death that is suppressed by overexpression of MCA1	GO:0003674,GO:0005634,GO:0005737,GO:0005739,GO:0008150
YIR021W	MRS1	chrIX	397294	398385	0	382.198	0.503181	0.210724	2.38786	0.0169466	0.280953	0.0195534	376.907	418.359	392.81	485.425	443.926	219.435	338.521	396.025	464.675	278.978	Splicing protein; required for splicing of two mitochondrial group I introns (BI3 in COB and AI5beta in COX1); forms a splicing complex, containing four subunits of Mrs1p and two subunits of the BI3-encoded maturase, that binds to the BI3 RNA; MRS1 has a paralog, CCE1, that arose from the whole genome duplication	GO:0000372,GO:0003723,GO:0004520,GO:0005739
YML050W	AIM32	chrXIII	173139	174074	0	351.721	0.388435	0.170822	2.27392	0.0229708	0.280953	0.0196434	386.213	403.822	405.388	325.782	331.527	312.457	296.857	398.474	328.655	304.657	Putative protein of unknown function; null mutant is viable and displays elevated frequency of mitochondrial genome loss	GO:0003674,GO:0005575,GO:0008150
YOL014W	YOL014W	chrXV	299693	300067	0	826.89	0.576183	0.257716	2.23573	0.0253696	0.280953	0.0197924	564.197	668.728	1127.15	1025.61	1346.89	522.352	533.3	786.692	1186.25	527.826	Putative protein of unknown function	GO:0003674,GO:0005575,GO:0008150
YOR312C	RPL20B	chrXV	900250	901194	1	28394.7	0.226686	0.111295	2.0368	0.0416696	0.280953	0.0197181	29625.6	30197	30193.2	27889.2	29573	25385.3	25899.4	30005.2	28731.1	25642.4	Ribosomal 60S subunit protein L20B; homologous to mammalian ribosomal protein L18A, no bacterial homolog; RPL20B has a paralog, RPL20A, that arose from the whole genome duplication	GO:0002181,GO:0003735,GO:0022625
YHL043W	ECM34	chrVIII	14901	15413	0	231.549	0.501078	0.206053	2.4318	0.0150242	0.281267	0.0199002	288.497	238.255	240.911	246.889	245.576	175.31	185.405	255.887	246.233	180.357	Putative protein of unknown function; member of the DUP380 subfamily of conserved, often subtelomerically-encoded proteins	GO:0003674,GO:0005575,GO:0008150
YKL160W	ELF1	chrXI	153269	153706	0	2616.29	0.278804	0.124864	2.23286	0.025558	0.281267	0.0199589	2673.25	2797.68	2632.6	2891.2	2866.63	2121.61	2331.1	2701.17	2878.92	2226.36	Transcription elongation factor with a conserved zinc finger domain; implicated in the maintenance of proper chromatin structure in actively transcribed regions; deletion inhibits Brome mosaic virus (BMV) gene expression	GO:0000993,GO:0005634,GO:0006368,GO:0008023,GO:0048096
YKR047W	YKR047W	chrXI	525257	525562	0	627.735	0.467516	0.203066	2.30228	0.0213195	0.281267	0.0199875	606.076	751.108	806.905	488.21	698.002	494.922	548.924	721.363	593.106	521.923	Dubious open reading frame; unlikely to encode a functional protein, based on available experimental and comparative sequence data; partially overlaps the verified gene NAP1	GO:0003674,GO:0005575,GO:0008150
YNL312W	RFA2	chrXIV	48287	49216	0	2595.66	0.321173	0.144558	2.22176	0.0262994	0.281267	0.0199942	2723.27	2892.17	2768.05	2367.72	2945.02	2128.76	2344.65	2794.5	2656.37	2236.7	Subunit of heterotrimeric Replication Protein A (RPA); RPA is a highly conserved single-stranded DNA binding protein involved in DNA replication, repair, and recombination; RPA protects against inappropriate telomere recombination, and upon telomere uncapping, prevents cell proliferation by a checkpoint-independent pathway; in concert with Sgs1p-Top2p-Rmi1p, stimulates DNA catenation/decatenation…	GO:0000722,GO:0000724,GO:0000781,GO:0000794,GO:0003690,GO:0003697,GO:0005662,GO:0006260,GO:0006265,GO:0006268,GO:0006281,GO:0006289,GO:0006312,GO:0007004,GO:0007131,GO:0010833,GO:0016567,GO:0030491,GO:0043565,GO:0045184
YDL130W	RPP1B	chrIV	229906	230527	0	28538	0.344433	0.148285	2.32278	0.0201909	0.282152	0.0201909	32500.1	31611.2	32377.8	23317.1	29297.2	22876.1	27786.8	32163	26307.2	25331.5	Ribosomal protein P1 beta; component of the ribosomal stalk, which is involved in interaction of translational elongation factors with ribosome; free (non-ribosomal) P1 stimulates the phosphorylation of the eIF2 alpha subunit (Sui2p) by Gcn2p; accumulation is regulated by phosphorylation and interaction with the P2 stalk component	GO:0002181,GO:0003735,GO:0022625,GO:0030295,GO:0045860
YDR545W	YRF1-1	chrIV	1526321	1531711	0	3782.7	-0.277622	0.130501	-2.12736	0.0333906	0.282152	0.0201137	3628.31	3392.1	3459.82	3981.79	3547.63	4475.77	3993.5	3493.41	3764.71	4234.63	Helicase encoded by the Y' element of subtelomeric regions; highly expressed in the mutants lacking the telomerase component TLC1; potentially phosphorylated by Cdc28p	GO:0000722,GO:0003678,GO:0005634
YPR042C	PUF2	chrXVI	650435	653662	1	626.47	-0.437532	0.196381	-2.22797	0.0258823	0.282152	0.0201924	573.503	600.886	469.243	642.283	613.94	872.971	612.462	547.878	628.112	742.716	PUF family mRNA-binding protein; Pumilio homology domain confers RNA binding activity; preferentially binds mRNAs encoding membrane-associated proteins; binding site composed of two UAAU tetranucleotides, separated by a 3-nt linker; PUF2 has a paralog, JSN1, that arose from the whole genome duplication	GO:0000288,GO:0003729,GO:0005737
YOL035C	YOL035C	chrXV	258803	259105	1	109.476	0.693658	0.299188	2.31847	0.0204238	0.283071	0.0203033	114.003	130.838	130.614	97.4563	137.9	93.0215	62.4961	125.152	117.678	77.7588	Dubious open reading frame; unlikely to encode a functional protein, based on available experimental and comparative sequence data	GO:0003674,GO:0005575,GO:0008150
YOR020C	HSP10	chrXV	370524	370844	1	7804.02	0.398528	0.171802	2.3197	0.0203573	0.283193	0.0203573	7991.82	8871.96	9394.54	6174.09	8914.41	7000.46	6280.86	8752.77	7544.25	6640.66	Mitochondrial matrix co-chaperonin; inhibits the ATPase activity of Hsp60p, a mitochondrial chaperonin; involved in protein folding and sorting in the mitochondria; 10 kD heat shock protein with similarity to E. coli groES	GO:0005739,GO:0005759,GO:0006457,GO:0042026,GO:0045041,GO:0051082,GO:0051087,GO:0051131
YNL064C	YDJ1	chrXIV	505868	507097	1	8446.72	0.359398	0.162551	2.21098	0.0270369	0.284909	0.0205549	8646.76	9384.01	7961.66	9672.31	9956.21	5649.27	7856.8	8664.14	9814.26	6753.03	Type I HSP40 co-chaperone; involved in regulation of HSP90 and HSP70 functions; critical for determining cell size at Start as a function of growth rate; involved in protein translocation across membranes; member of the DnaJ family	GO:0001671,GO:0005829,GO:0006458,GO:0006626,GO:0030433,GO:0042026,GO:0045047,GO:0048471,GO:0051082,GO:0072380
YOL130W	ALR1	chrXV	74400	76979	0	1779.43	-0.418271	0.163837	-2.55297	0.0106808	0.284909	0.0205717	1875.23	1679.09	1414.5	1678.1	1383.73	2234.9	2190.49	1656.27	1530.92	2212.69	Plasma membrane Mg(2+) transporter; expression and turnover are regulated by Mg(2+) concentration; overexpression confers increased tolerance to Al(3+) and Ga(3+) ions	GO:0005886,GO:0006812,GO:0015693,GO:0016021,GO:0022890
YGL167C	PMR1	chrVII	187616	190468	1	5110.69	-0.381213	0.172665	-2.20782	0.0272568	0.286208	0.020722	4988.2	4610.83	5360.98	4034.69	3789.43	7724.36	5266.34	4986.67	3912.06	6495.35	High affinity Ca2+/Mn2+ P-type ATPase; required for Ca2+ and Mn2+ transport into Golgi; involved in Ca2+ dependent protein sorting and processing; D53A mutant (Mn2+ transporting) is rapamycin sensitive, Q783A mutant (Ca2+ transporting) is rapamycin resistant; Mn2+ transport into Golgi lumen appears to be required for rapamycin sensitivity; mutations in human homolog ATP2C1 cause acantholytic skin…	GO:0000139,GO:0005388,GO:0005509,GO:0006816,GO:0006828,GO:0006874,GO:0006887,GO:0015410,GO:0016021
YIL070C	MAM33	chrIX	230272	231072	1	1478.4	0.414651	0.155285	2.67026	0.00757933	0.286208	0.0208017	1537.87	1443.26	1705.72	1759.78	1559.41	1062.59	1280.13	1562.29	1659.59	1171.36	Acidic protein of the mitochondrial matrix; involved in oxidative phosphorylation; related to the human complement receptor gC1q-R	GO:0003674,GO:0005739,GO:0005759,GO:0009060
YJL140W	RPB4	chrX	150961	151626	0	3789.17	0.319461	0.151133	2.11378	0.0345343	0.286208	0.0208027	3829.56	4051.14	4252.22	3413.76	4494.98	3279.6	3202.93	4044.3	3954.37	3241.26	RNA polymerase II subunit B32; forms dissociable heterodimer with Rpb7p; Rpb4/7 dissociates from RNAPII as Ser2 CTD phosphorylation increases; Rpb4/7 regulates cellular lifespan via mRNA decay process; involved in recruitment of 3'-end processing factors to transcribing RNAPII complex, export of mRNA to cytoplasm under stress conditions; also involved in translation initiation	GO:0000288,GO:0000932,GO:0003697,GO:0003727,GO:0003968,GO:0005634,GO:0005665,GO:0005737,GO:0006366,GO:0006367,GO:0031369,GO:0031990,GO:0034402,GO:0045948
YLR142W	PUT1	chrXII	425186	426616	0	244.726	-0.443987	0.192356	-2.30815	0.0209908	0.288163	0.0209908	240.802	222.102	208.983	210.691	221.963	298.146	310.397	223.962	216.327	304.272	Proline oxidase; nuclear-encoded mitochondrial protein involved in utilization of proline as sole nitrogen source; PUT1 transcription is induced by Put3p in the presence of proline and the absence of a preferred nitrogen source	GO:0004657,GO:0005739,GO:0006537,GO:0010133
YER039C	HVG1	chrV	228456	229205	1	116.498	-0.582102	0.252744	-2.30313	0.0212714	0.289657	0.0211459	114.003	109.839	93.8487	90.9592	89.7297	168.154	148.949	105.897	90.3444	158.552	Protein of unknown function; HVG1 has a paralog, VRG4, that arose from the whole genome duplication	GO:0003674,GO:0008150,GO:0016021
YMR153C-A	YMR153C-A	chrXIII	565574	565909	1	91.8126	0.74048	0.329983	2.24399	0.0248328	0.290253	0.0212358	88.4103	138.915	96.7512	80.7495	107.676	73.9402	56.2465	108.025	94.2126	65.0933	Dubious open reading frame; unlikely to encode a functional protein, based on available experimental and comparative sequence data; almost completely overlaps 3' end of verified gene NUP53/YMR153W	GO:0003674,GO:0005575,GO:0008150
YER129W	SAK1	chrV	417281	420709	0	1767.38	-0.431532	0.187533	-2.30109	0.0213863	0.291674	0.0213863	1718.18	1567.64	1438.69	1906.43	1492.35	2498.46	1749.89	1574.84	1699.39	2124.18	Upstream serine/threonine kinase for the SNF1 complex; plays a role in pseudohyphal groth; partially redundant with Elm1p and Tos3p; members of this family have functional orthology with LKB1, a mammalian kinase associated with Peutz-Jeghers cancer-susceptibility syndrome; SAK1 has a paralog, TOS3, that arose from the whole genome duplication	GO:0004672,GO:0004674,GO:0005737,GO:0006006,GO:0006261,GO:0006468,GO:0007124
YNL322C	KRE1	chrXIV	33294	34235	1	5321.65	-0.439241	0.200362	-2.19223	0.0283627	0.293442	0.0215628	4622.93	4307.16	5905.69	4391.1	4613.05	8177.54	5234.05	4945.26	4502.08	6705.8	Cell wall glycoprotein involved in beta-glucan assembly; serves as a K1 killer toxin membrane receptor	GO:0005199,GO:0009277,GO:0016021,GO:0031505
YDL050C	YDL050C	chrIV	364446	364817	1	268.736	0.588345	0.256688	2.29206	0.0219019	0.295655	0.0217727	231.495	322.25	330.889	237.608	365.53	219.435	173.947	294.878	301.569	196.691	Dubious open reading frame; unlikely to encode a functional protein, based on available experimental and comparative sequence data	GO:0003674,GO:0005575,GO:0008150
YMR263W	SAP30	chrXIII	794919	795524	0	1246.6	0.419109	0.165551	2.53159	0.0113546	0.295688	0.0218696	1130.72	1346.34	1334.2	1328.19	1685.97	903.978	996.813	1270.42	1507.08	950.396	Component of Rpd3L histone deacetylase complex; involved in silencing at telomeres, rDNA, and silent mating-type loci; involved in telomere maintenance	GO:0000118,GO:0004407,GO:0016479,GO:0031939,GO:0033698,GO:0045944,GO:0061186,GO:0061188,GO:0061408,GO:0070210,GO:2000219
YOR386W	PHR1	chrXV	1066839	1068536	0	364.184	-0.50044	0.208698	-2.39792	0.0164886	0.295688	0.0218399	340.845	316.596	282.514	430.664	292.802	440.063	445.806	313.318	361.733	442.934	DNA photolyase involved in photoreactivation; repairs pyrimidine dimers in the presence of visible light; induced by DNA damage; regulated by transcriptional repressor Rph1p	GO:0000719,GO:0003729,GO:0003904,GO:0005634,GO:0005737,GO:0005739
YFL052W	YFL052W	chrVI	28232	29629	0	34.6902	-1.04699	0.469308	-2.23093	0.0256858	0.295703	0.0219652	33.7355	20.1911	21.2853	27.8447	36.8364	64.3995	38.5393	25.0706	32.3405	51.4694	Putative zinc cluster protein that contains a DNA binding domain; computational analysis suggests a role as a transcription factor; null mutant is sensitive to Calcofluor White, low osmolarity, and heat, suggesting a role for YFL052Wp in cell wall integrity	GO:0003677,GO:0005575,GO:0008150
YGR074W	SMD1	chrVII	635712	636152	0	316.391	0.412793	0.180337	2.28901	0.022079	0.295703	0.0219487	357.131	349.709	389.907	288.656	280.523	262.368	286.44	365.583	284.59	274.404	Core Sm protein Sm D1; part of heteroheptameric complex (with Smb1p, Smd2p, Smd3p, Sme1p, Smx3p, and Smx2p) that is part of the spliceosomal U1, U2, U4, and U5 snRNPs; relocalizes to the cytosol in response to hypoxia; homolog of human Sm D1; protein abundance increases in response to DNA replication stress	GO:0000243,GO:0000398,GO:0003729,GO:0005634,GO:0005682,GO:0005685,GO:0005829,GO:0046540,GO:0071004
YHR049W	FSH1	chrVIII	206462	207193	0	2906.63	0.285239	0.143506	1.98765	0.0468504	0.296543	0.0221696	2955.93	3160.31	2921.89	3131.6	3233.1	2189.58	2754	3012.71	3182.35	2471.79	Putative serine hydrolase; localizes to both the nucleus and cytoplasm; sequence is similar to S. cerevisiae Fsh2p and Fsh3p and the human candidate tumor suppressor OVCA2	GO:0005634,GO:0005737,GO:0008150,GO:0016787
YJR070C	LIA1	chrX	569621	570598	1	3427.12	0.333051	0.145583	2.2877	0.0221548	0.296543	0.0221548	3632.96	3686.89	3289.54	4015.2	3751.64	2496.08	3117.51	3536.47	3883.42	2806.8	Deoxyhypusine hydroxylase; HEAT-repeat containing metalloenzyme that catalyzes hypusine formation; binds to and is required for the modification of Hyp2p (eIF5A); complements S. pombe mmd1 mutants defective in mitochondrial positioning; protein abundance increases in response to DNA replication stress	GO:0000226,GO:0005634,GO:0005737,GO:0008612,GO:0019135
YNR075C-A	YNR075C-A	chrXIV	781511	781603	1	71.7758	-0.739862	0.332151	-2.22749	0.0259147	0.296543	0.0221609	76.7773	48.4586	80.3035	32.4854	36.8364	110.91	116.659	68.5131	34.6609	113.785	Protein of unknown function; identified by gene-trapping, microarray-based expression analysis, and genome-wide homology searching	GO:0003674,GO:0005575,GO:0008150
YDL084W	SUB2	chrIV	305237	306577	0	12833.3	0.253738	0.12181	2.08306	0.0372457	0.299464	0.0224359	13213.8	13878.5	13577.1	12638.7	13785.3	10775	11964.9	13556.5	13212	11369.9	Component of the TREX complex required for nuclear mRNA export; member of the DEAD-box RNA helicase superfamily and is involved in early and late steps of spliceosome assembly; homolog of the human splicing factor hUAP56; relocalizes from nucleus to cytoplasm upon DNA replication stress	GO:0000346,GO:0000398,GO:0000781,GO:0004004,GO:0005634,GO:0005681,GO:0005737,GO:0006283,GO:0006348,GO:0006368,GO:0006406,GO:0031124
YER153C	PET122	chrV	474041	474805	1	396.887	-0.407033	0.170513	-2.38711	0.0169816	0.299586	0.0224929	401.336	365.055	337.662	349.915	349.473	475.841	498.927	368.017	349.694	487.384	Mitochondrial translational activator specific for the COX3 mRNA; acts together with Pet54p and Pet494p; located in the mitochondrial inner membrane	GO:0003743,GO:0005739,GO:0005743,GO:0031305,GO:0070131,GO:0097034
YJR159W	SOR1	chrX	736044	737117	0	229.287	-0.522543	0.235429	-2.21954	0.0264501	0.300623	0.0226188	239.638	173.643	249.618	146.649	161.513	358.968	274.983	220.967	154.081	316.975	Sorbitol dehydrogenase; expression is induced in the presence of sorbitol or xylose	GO:0003939,GO:0005575,GO:0019318
YGL027C	CWH41	chrVII	443642	446143	1	4249.59	-0.428389	0.188216	-2.27605	0.022843	0.302599	0.022843	3794.66	3726.47	4492.16	3322.8	3631.69	6555.63	4223.7	4004.43	3477.24	5389.66	Processing alpha glucosidase I; ER type II integral membrane N-glycoprotein involved in assembly of cell wall beta 1,6 glucan and asparagine-linked protein glycosylation; also involved in ER protein quality control and sensing of ER stress	GO:0004573,GO:0005789,GO:0006487,GO:0009272
YML117W	NAB6	chrXIII	34243	37647	0	3553.42	-0.36979	0.17048	-2.16911	0.0300744	0.302599	0.0228641	3501.51	3213.61	3129.9	3845.35	2704.17	3930.75	4548.67	3281.68	3274.76	4239.71	Putative RNA-binding protein; associates with mRNAs encoding cell wall proteins in high-throughput studies; deletion mutants display increased sensitivity to some cell wall disrupting agents; expression negatively regulated by cAMP	GO:0003729,GO:0005737,GO:0008150,GO:0010494
YLL067C	YLL067C	chrXII	585	4301	1	1403.32	-0.3947	0.149679	-2.63697	0.00836511	0.303205	0.0229583	1521.59	1263.15	1299.37	1149.98	1011.58	1848.5	1729.06	1361.37	1080.78	1788.78	Putative Y' element ATP-dependent helicase	GO:0004386,GO:0005575,GO:0008150
YLR438C-A	LSM3	chrXII	1013909	1014178	1	2319.11	0.27568	0.127267	2.16615	0.0302998	0.303584	0.0230355	2421.98	2628.88	2401.37	2356.59	2320.69	1977.3	2126.95	2484.07	2338.64	2052.13	Lsm (Like Sm) protein; part of heteroheptameric complexes (Lsm2p-7p and either Lsm1p or 8p): cytoplasmic Lsm1p complex involved in mRNA decay; nuclear Lsm8p complex part of U6 snRNP and possibly involved in processing tRNA, snoRNA, and rRNA; protein increases in abundance and relocalizes from nucleus to cytoplasmic foci upon DNA replication stress	GO:0000398,GO:0000956,GO:0003723,GO:0005634,GO:0005688,GO:0005730,GO:0005732,GO:0005737,GO:0046540
YLR049C	YLR049C	chrXII	243886	245172	1	1425.7	0.367933	0.154379	2.38331	0.0171578	0.303955	0.0231122	1414.56	1562.79	1581.88	1349.54	1715.25	1166.35	1189.51	1519.75	1532.4	1177.93	Putative protein of unknown function	GO:0003674,GO:0005575,GO:0008150
YBR038W	CHS2	chrII	311898	314789	0	1841.42	-0.308709	0.136024	-2.26951	0.0232373	0.304321	0.0232373	1806.59	1703.32	1642.84	1820.11	1662.36	2252.79	2001.96	1717.58	1741.24	2127.37	Chitin synthase II; catalyzes transfer of N-acetylglucosamine (GlcNAc) to chitin upon activation of zymogenic form; required for chitin synthesis in the primary septum during cytokinesis; localization regulated by Cdk1p during mitosis; phosphorylation by Dbf2p kinase regulates its dynamics and chitin synthesis during cytokinesis	GO:0000916,GO:0004100,GO:0005935,GO:0006031,GO:0016021
YKL174C	TPO5	chrXI	120380	122236	1	2055.96	-0.446869	0.19686	-2.26999	0.0232083	0.304321	0.0232083	1972.94	1729.97	2275.59	1279.93	1700.14	3177.04	2256.11	1992.83	1490.03	2716.58	Protein involved in excretion of putrescine and spermidine; putative polyamine transporter in the Golgi or post-Golgi vesicles	GO:0005794,GO:0015203,GO:0015846,GO:0016021
YHL035C	VMR1	chrVIII	27978	32756	1	965.92	-0.380032	0.154638	-2.45756	0.0139883	0.305821	0.0234495	894.572	877.908	884.306	899.382	899.186	1291.57	1014.52	885.595	899.284	1153.04	Vacuolar membrane protein; involved in multiple drug resistance and metal sensitivity; ATP-binding cassette (ABC) family member involved in drug transport; potential Cdc28p substrate; induced under respiratory conditions; VMR1 has a paralog, YBT1, that arose from the whole genome duplication	GO:0000329,GO:0005739,GO:0005840,GO:0010038,GO:0015893,GO:0016021,GO:0042493,GO:0042626
YIL011W	TIR3	chrIX	333727	334536	0	407.095	-0.389156	0.171856	-2.26444	0.0235473	0.305821	0.0234084	425.765	373.939	364.752	350.843	319.249	490.152	524.967	388.152	335.046	507.56	Cell wall mannoprotein; member of Srp1p/Tip1p family of serine-alanine-rich proteins; expressed under anaerobic conditions and required for anaerobic growth; TIR3 has a paralog, TIR2, that arose from the whole genome duplication	GO:0003674,GO:0008150,GO:0009277
YFL050C	ALR2	chrVI	33272	35848	1	465.262	-0.383264	0.165348	-2.31792	0.0204534	0.307138	0.0235996	437.398	461.972	389.907	431.592	414.646	547.396	573.923	429.759	423.119	560.659	Probable Mg(2+) transporter; overexpression confers increased tolerance to Al(3+) and Ga(3+) ions; plays a role in regulating Ty1 transposition	GO:0005886,GO:0006812,GO:0015693,GO:0016021,GO:0022890,GO:0055085
YHR052W	CIC1	chrVIII	210848	211978	0	2311.39	0.28924	0.147617	1.95939	0.0500674	0.3077	0.0236919	2484.79	2432.62	2280.43	2644.31	2412.31	1739.98	2185.28	2399.28	2528.31	1962.63	Essential protein that interacts with proteasome components; has a potential role in proteasome substrate specificity; also copurifies with 66S pre-ribosomal particles	GO:0000502,GO:0005730,GO:0030163,GO:0030674,GO:0030687,GO:0042273
YBR186W	PCH2	chrII	600553	602360	0	255.117	0.501355	0.22808	2.19815	0.0279382	0.308711	0.0238913	272.211	331.941	288.319	264.524	208.74	175.31	244.776	297.49	236.632	210.043	Hexameric ring ATPase that remodels chromosome axis protein Hop1p; nucleolar component of the pachytene checkpoint, which prevents chromosome segregation when recombination and chromosome synapsis are defective; also represses meiotic interhomolog recombination in rDNA; required for meiotic double-stranded break formation	GO:0005730,GO:0007131,GO:0016887,GO:0042138,GO:0051598
YCL040W	GLK1	chrIII	50838	52340	0	9997.81	-0.293513	0.136509	-2.15013	0.0315446	0.308711	0.0239819	9575.06	9082.75	8499.59	10394.4	10245.2	9999.81	12187.8	9052.47	10319.8	11093.8	Glucokinase; catalyzes the phosphorylation of glucose at C6 in the first irreversible step of glucose metabolism; one of three glucose phosphorylating enzymes; expression regulated by non-fermentable carbon sources; GLK1 has a paralog, EMI2, that arose from the whole genome duplication	GO:0004340,GO:0005829,GO:0005886,GO:0006006,GO:0006013,GO:0006096,GO:0046323
YLR001C	YLR001C	chrXII	151389	153977	1	1345.24	-0.448794	0.171164	-2.62201	0.00874137	0.308711	0.023991	1145.84	1252.65	1286.79	1171.33	1204.27	1964.18	1391.58	1228.43	1187.8	1677.88	Putative protein of unknown function; the authentic, non-tagged protein is detected in highly purified mitochondria in high-throughput studies; predicted to be palmitoylated	GO:0000329,GO:0003674,GO:0005739,GO:0008150
YNR076W	PAU6	chrXIV	781918	782280	0	261.784	-0.507957	0.22515	-2.25608	0.0240657	0.308711	0.0240657	239.638	203.526	312.506	193.056	168.125	354.197	361.436	251.89	180.591	357.817	Member of the seripauperin multigene family; encoded mainly in subtelomeric regions; active during alcoholic fermentation; regulated by anaerobiosis; negatively regulated by oxygen; repressed by heme; identical to Pau18p	GO:0003674,GO:0005575,GO:0008150
YOR287C	RRP36	chrXV	850937	851839	1	764.567	0.346567	0.146261	2.36952	0.0178112	0.308711	0.0239924	763.12	747.878	832.06	889.173	891.63	601.062	627.044	781.019	890.401	614.053	Component of 90S preribosomes; involved in early cleavages of the 35S pre-rRNA and in production of the 40S ribosomal subunit	GO:0000462,GO:0000469,GO:0003674,GO:0005730,GO:0030686,GO:0042274
YPR119W	CLB2	chrXVI	771653	773128	0	902.257	-0.580885	0.245209	-2.36894	0.017839	0.308711	0.0240298	758.467	755.146	804.97	828.843	854.793	1564.67	748.912	772.861	841.818	1156.79	B-type cyclin involved in cell cycle progression; activates Cdc28p to promote the transition from G2 to M phase; accumulates during G2 and M, then targeted via a destruction box motif for ubiquitin-mediated degradation by the proteasome; CLB2 has a paralog, CLB1, that arose from the whole genome duplication	GO:0000079,GO:0000086,GO:0005515,GO:0005634,GO:0005737,GO:0005816,GO:0005819,GO:0005935,GO:0010696,GO:0016538,GO:0032888,GO:0035308
YFR034C	PHO4	chrVI	225020	225958	1	1069.29	-0.408446	0.16699	-2.44593	0.0144478	0.30942	0.0242197	1023.7	1066.09	830.125	1057.17	924.688	1202.12	1381.16	973.304	990.928	1291.64	Basic helix-loop-helix (bHLH) transcription factor of the myc-family; activates transcription cooperatively with Pho2p in response to phosphate limitation; binding to 'CACGTG' motif is regulated by chromatin restriction, competitive binding of Cbf1p to the same DNA binding motif and cooperation with Pho2p; function is regulated by phosphorylation at multiple sites and by phosphate availability	GO:0003700,GO:0005634,GO:0005737,GO:0006338,GO:0016036,GO:0043565,GO:0045937,GO:0045944
YPR066W	UBA3	chrXVI	681213	682112	0	413.733	-0.43443	0.192735	-2.25402	0.0241948	0.30942	0.0241948	423.439	379.592	383.135	337.849	303.192	618.951	449.972	395.389	320.52	534.461	Protein that activates Rub1p (NEDD8) before neddylation; acts together with Ula1p; may play a role in protein degradation; GFP-fusion protein localizes to the cytoplasm in a punctate pattern	GO:0005737,GO:0019781,GO:0045116
YPL046C	ELC1	chrXVI	466644	466943	1	333.789	0.420584	0.178302	2.35884	0.0183324	0.309584	0.0242821	372.254	339.21	379.265	363.837	339.084	273.102	269.775	363.576	351.46	271.438	Elongin C, conserved among eukaryotes; forms a complex with Cul3p that polyubiquitylates monoubiquitylated RNA polymerase II to trigger its proteolysis; plays a role in global genomic repair	GO:0000113,GO:0004842,GO:0031463,GO:0042787,GO:0070449,GO:0070911
YMR317W	YMR317W	chrXIII	907364	910786	0	893.257	-0.335438	0.155699	-2.1544	0.0312092	0.309796	0.0243482	878.286	820.565	725.634	956	834.014	994.615	1043.68	808.162	895.007	1019.15	Putative protein of unknown function; has some similarity to sialidase from Trypanosoma; YMR317W is not an essential gene	GO:0003674,GO:0005575,GO:0008150
YHL018W	YHL018W	chrVIII	69708	70070	0	69.3289	-0.919238	0.408907	-2.24804	0.0245739	0.310193	0.024429	72.1242	62.1885	35.798	66.8272	34.0028	129.992	84.3697	56.7035	50.415	107.181	Putative 4a-hydroxytetrahydrobiopterin dehydratase; green fluorescent protein (GFP)-fusion protein localizes to mitochondria and is induced in response to the DNA-damaging agent MMS	GO:0003674,GO:0005739,GO:0008150
YJR034W	PET191	chrX	496683	497009	0	687.495	0.332362	0.154715	2.14822	0.0316961	0.311464	0.024728	687.506	760.8	728.537	688.691	793.399	587.944	565.59	725.614	741.045	576.767	Protein required for assembly of cytochrome c oxidase; exists as an oligomer; described as both an integral mitochondrial inner membrane protein facing the intermembrane space (IMS) and as a soluble IMS protein; contains a twin Cx9C motif; imported into the IMS via the MIA import machinery	GO:0003674,GO:0005739,GO:0005758,GO:0031305,GO:0033617
YJR078W	BNA2	chrX	578860	580221	0	207.008	-0.515475	0.235872	-2.1854	0.0288595	0.311464	0.0246792	223.352	174.451	144.159	208.835	183.237	258.791	256.234	180.654	196.036	257.512	Putative tryptophan 2,3-dioxygenase or indoleamine 2,3-dioxygenase; required for de novo biosynthesis of NAD from tryptophan via kynurenine; interacts genetically with telomere capping gene CDC13; regulated by Hst1p and Aftp	GO:0005737,GO:0019441,GO:0033754,GO:0034354
YLR180W	SAM1	chrXII	515262	516410	0	9463.72	-0.314564	0.140069	-2.24578	0.0247182	0.311464	0.0247182	10159	9506.77	8509.27	7518.99	7194.43	10684.4	12673.2	9391.69	7356.71	11678.8	S-adenosylmethionine synthetase; catalyzes transfer of the adenosyl group of ATP to the sulfur atom of methionine; SAM1 has a paralog, SAM2, that arose from the whole genome duplication	GO:0004478,GO:0005737,GO:0006555,GO:0006556
YOR095C	RKI1	chrXV	503552	504328	1	1711.27	0.362789	0.141474	2.56436	0.0103367	0.311464	0.0246649	1669.33	1843.04	1973.72	1719.87	1927.77	1435.87	1409.29	1828.7	1823.82	1422.58	Ribose-5-phosphate ketol-isomerase; catalyzes the interconversion of ribose 5-phosphate and ribulose 5-phosphate in the pentose phosphate pathway; participates in pyridoxine biosynthesis	GO:0004751,GO:0005634,GO:0005737,GO:0006098,GO:0008615
YBR043C	QDR3	chrII	321876	323945	1	3469.87	-0.414993	0.194398	-2.13476	0.0327806	0.313109	0.0249216	3222.32	3010.09	3710.41	2636.89	2870.4	5438.18	3400.83	3314.27	2753.65	4419.5	Multidrug transporter of the major facilitator superfamily; member of the 12-spanner drug:H(+) antiporter DHA1 family; has a role in polyamine homeostasis; involved in spore wall asembly; sequence similarity to DTR1 and QDR1, and the triple mutant dtr1 qdr1 qdr3 exhibits reduced dityrosine fluorescence relative to the single mutants; expression is upregulated under polyamine stress; required for …	GO:0005886,GO:0006855,GO:0010509,GO:0015203,GO:0015238,GO:0016021,GO:0030476
YNL328C	MDJ2	chrXIV	22834	23274	1	74.3517	-0.717992	0.329209	-2.18096	0.0291864	0.313109	0.0249587	62.8178	54.9197	59.9858	84.4621	63.283	116.873	78.1201	59.2411	73.8726	97.4967	Constituent of the mitochondrial import motor; associated with the presequence translocase; function overlaps with that of Pam18p; stimulates the ATPase activity of Ssc1p to drive mitochondrial import; contains a J domain	GO:0001405,GO:0001671,GO:0005743,GO:0008565,GO:0030150
YBR162C	TOS1	chrII	563203	564570	1	22431.9	-0.354226	0.158664	-2.23256	0.0255779	0.316131	0.0255779	23041.3	19932.6	23906.3	15694.2	17453.8	32457.3	24538.1	22293.4	16574	28497.7	Covalently-bound cell wall protein of unknown function; identified as a cell cycle regulated SBF target gene; deletion mutants are highly resistant to treatment with beta-1,3-glucanase; has sequence similarity to YJL171C	GO:0000324,GO:0003674,GO:0008150,GO:0009277
YBR185C	MBA1	chrII	599123	599959	1	921.839	0.334852	0.143032	2.3411	0.0192272	0.316131	0.0258997	922.491	965.941	1045.88	965.281	1002.14	758.483	792.659	978.104	983.71	775.571	Membrane-associated mitochondrial ribosome receptor; forms a complex with Mdm38p that may facilitate recruitment of mRNA-specific translational activators to ribosomes; possible role in protein export from the matrix to inner membrane	GO:0005739,GO:0005743,GO:0007007,GO:0032979,GO:0043022,GO:0070131,GO:0097033,GO:0097034
YBR242W	YBR242W	chrII	704670	705386	0	1508.95	0.409326	0.165322	2.47593	0.013289	0.316131	0.0255954	1418.05	1670.21	1686.37	1466.49	1923.99	1174.69	1222.84	1591.54	1695.24	1198.77	Putative protein of unknown function; green fluorescent protein (GFP)-fusion protein localizes to the cytoplasm and nucleus; YBR242W is not an essential gene; YBR242W has a paralog, YGL101W, that arose from the whole genome duplication	GO:0003674,GO:0005634,GO:0005737,GO:0008150
YDR067C	OCA6	chrIV	582791	583465	1	657.012	0.368094	0.167129	2.20246	0.0276329	0.316131	0.0259065	600.259	708.303	761.432	766.656	692.335	529.507	540.591	689.998	729.496	535.049	Cytoplasmic protein required for replication of Brome mosaic virus; S. cerevisiae is a model system for studying positive-strand RNA virus replication; null mutation confers sensitivity to tunicamycin and DTT	GO:0003674,GO:0005737,GO:0008150
YJL141C	YAK1	chrX	147967	150390	1	994.442	-0.389388	0.17468	-2.22915	0.0258041	0.316131	0.0258041	1017.88	920.713	775.945	1052.53	824.568	1199.74	1169.72	904.846	938.548	1184.73	Serine-threonine protein kinase; component of a glucose-sensing system that inhibits growth in response to glucose availability; upon nutrient deprivation Yak1p phosphorylates Pop2p to regulate mRNA deadenylation, the co-repressor Crf1p to inhibit transcription of ribosomal genes, and the stress-responsive transcription factors Hsf1p and Msn2p; nuclear localization negatively regulated by the Ras…	GO:0004672,GO:0004674,GO:0004713,GO:0005634,GO:0005737,GO:0006468
YJL154C	VPS35	chrX	131101	133935	1	2898.34	-0.285741	0.133983	-2.13267	0.0329521	0.316131	0.0257331	2893.11	2729.03	2732.25	2794.68	2350.92	3326.12	3462.28	2784.8	2572.8	3394.2	Endosomal subunit of membrane-associated retromer complex; required for retrograde transport; receptor that recognizes retrieval signals on cargo proteins, forms subcomplex with Vps26p and Vps29p that selects cargo proteins for retrieval; interacts with Ypt7p	GO:0000329,GO:0005768,GO:0008565,GO:0030904,GO:0030906,GO:0042147,GO:0045053
YLR029C	RPL15A	chrXII	201976	202590	1	44314.5	0.292888	0.152438	1.92136	0.0546864	0.316131	0.0258776	46024.5	48532.1	50679.3	37891.9	48040.3	35598.6	43434.8	48412	42966.1	39516.7	Ribosomal 60S subunit protein L15A; binds to 5.8 S rRNA; homologous to mammalian ribosomal protein L15, no bacterial homolog; RPL15A has a paralog, RPL15B, that arose from the whole genome duplication	GO:0002181,GO:0003723,GO:0003735,GO:0022625
YLR333C	RPS25B	chrXII	795573	796335	1	10917.7	0.26946	0.125907	2.14015	0.0323427	0.316131	0.0252572	11740	12330.3	11809.5	9713.14	10986.7	9409.48	10434.8	11959.9	10349.9	9922.12	Protein component of the small (40S) ribosomal subunit; homologous to mammalian ribosomal protein S25, no bacterial homolog; RPS25B has a paralog, RPS25A, that arose from the whole genome duplication	GO:0002181,GO:0003735,GO:0022627
YNL141W	AAH1	chrXIV	359596	360639	0	3527.89	0.252035	0.118218	2.13194	0.0330114	0.316131	0.0257794	3886.56	3775.73	3660.1	3575.25	3459.79	3140.07	3197.72	3774.13	3517.52	3168.89	Adenine deaminase (adenine aminohydrolase); converts adenine to hypoxanthine; involved in purine salvage; transcriptionally regulated by nutrient levels and growth phase; Aah1p degraded upon entry into quiescence via SCF and the proteasome	GO:0000034,GO:0005634,GO:0005737,GO:0006146,GO:0043101,GO:0043103
YNL278W	CAF120	chrXIV	113271	116453	0	965.869	-0.389002	0.182001	-2.13736	0.0325687	0.316131	0.0254088	1084.19	836.718	835.931	898.454	701.78	1135.34	1268.67	918.946	800.117	1202.01	Part of the CCR4-NOT transcriptional regulatory complex; involved in controlling mRNA initiation, elongation, and degradation; CAF120 has a paralog, SKG3, that arose from the whole genome duplication	GO:0003674,GO:0005575,GO:0006357
YNR039C	ZRG17	chrXIV	697614	699431	1	1010.01	-0.387378	0.175866	-2.2027	0.0276162	0.316131	0.0258909	938.777	849.641	937.519	967.138	999.305	1396.52	981.189	908.646	983.221	1188.85	Endoplasmic reticulum zinc transporter; part of a heterodimeric transporter with Msc2p that transfers zinc from the cytosol to the ER lumen; member of the cation diffusion facilitator family of efflux pumps; zinc-regulated directly through Zap1p; transcription induced under conditions of zinc deficiency	GO:0005385,GO:0005783,GO:0006829,GO:0016021
YOL019W	YOL019W	chrXV	288898	290553	0	1888.72	-0.374271	0.167473	-2.23481	0.0254298	0.316131	0.0254298	1818.23	1692.01	1853.75	1705.02	1515.96	2697.62	1938.42	1788	1610.49	2318.02	Protein of unknown function; green fluorescent protein (GFP)-fusion protein localizes to the cell periphery and vacuole; YOL019W has a paralog, DCV1, that arose from the whole genome duplication	GO:0000324,GO:0003674,GO:0005886,GO:0008150,GO:0016021
YOR136W	IDH2	chrXV	580250	581359	0	5677.32	0.315301	0.147381	2.13936	0.0324067	0.316131	0.0253072	5688.5	6145.36	5439.35	6514.72	6699.5	4041.67	5212.18	5757.74	6607.11	4626.92	Subunit of mitochondrial NAD(+)-dependent isocitrate dehydrogenase; complex catalyzes the oxidation of isocitrate to alpha-ketoglutarate in the TCA cycle; phosphorylated	GO:0004449,GO:0005739,GO:0005962,GO:0006099,GO:0006102,GO:0006537
YOR357C	SNX3	chrXV	1009224	1009712	1	864.618	0.368297	0.151888	2.42479	0.0153172	0.316131	0.0256771	873.633	940.904	1012.02	829.771	936.022	704.817	755.161	942.185	882.896	729.989	Sorting nexin for late-Golgi enzymes; required to maintain late-Golgi resident enzymes in their proper location by recycling molecules from the prevacuolar compartment; contains a PX domain and sequence similarity to human Snx3p	GO:0005768,GO:0005829,GO:0008104,GO:0032266,GO:0034499
YIL066C	RNR3	chrIX	238099	240708	1	245.409	-0.554467	0.249358	-2.22358	0.0261766	0.316308	0.0260222	253.598	202.718	211.885	245.033	152.068	283.835	368.727	222.734	198.551	326.281	Minor isoform of large subunit of ribonucleotide-diphosphate reductase; the RNR complex catalyzes rate-limiting step in dNTP synthesis, regulated by DNA replication and DNA damage checkpoint pathways via localization of small subunits; RNR3 has a paralog, RNR1, that arose from the whole genome duplication	GO:0004748,GO:0005737,GO:0005739,GO:0005971,GO:0009263
YMR143W	RPS16A	chrXIII	551928	552903	0	29101.7	0.283117	0.132998	2.12873	0.033277	0.316308	0.0259868	29511.6	31901.9	32298.5	26909.1	31748.2	24335.9	27006.7	31237.3	29328.7	25671.3	Protein component of the small (40S) ribosomal subunit; homologous to mammalian ribosomal protein S16 and bacterial S9; RPS16A has a paralog, RPS16B, that arose from the whole genome duplication	GO:0000462,GO:0002181,GO:0003735,GO:0022627,GO:0030686
YIL039W	TED1	chrIX	278426	279847	0	3331.66	-0.358715	0.187343	-1.91475	0.0555248	0.318755	0.0262744	3018.74	3072.27	3458.86	2600.69	3005.47	4964.72	3200.84	3183.29	2803.08	4082.78	Conserved phosphoesterase domain-containing protein; acts together with Emp24p/Erv25p in cargo exit from the ER; deletion confers sensitivity to 4-(N-(S-glutathionylacetyl)amino) phenylarsenoxide (GSAO)	GO:0003674,GO:0005783,GO:0006888
YOR056C	NOB1	chrXV	430247	431626	1	2327.62	0.286195	0.128911	2.2201	0.0264119	0.319804	0.0264119	2390.57	2479.46	2351.05	2565.42	2559.66	1847.31	2099.87	2407.03	2562.54	1973.59	Protein involved in proteasomal and 40S ribosomal subunit biogenesis; required for cleavage of the 20S pre-rRNA to generate the mature 18S rRNA; cleavage is activated by Fun12p, a GTPase and translation initiation factor; relocalizes from nucleus to nucleolus upon DNA replication stress	GO:0000462,GO:0004521,GO:0005634,GO:0005737,GO:0030490,GO:0030688,GO:0042274,GO:0043248,GO:0070181
YBR189W	RPS9B	chrII	604508	605508	0	46239.8	0.280519	0.14693	1.90921	0.0562352	0.321586	0.0266105	49148	52072	49500.8	43118.4	47115.6	35714.3	47009.6	50240.3	45117	41361.9	Protein component of the small (40S) ribosomal subunit; homologous to mammalian ribosomal protein S9 and bacterial S4; RPS9B has a paralog, RPS9A, that arose from the whole genome duplication	GO:0000462,GO:0003735,GO:0022627,GO:0030686,GO:0032040,GO:0045903
YBR194W	AIM4	chrII	610038	610409	0	232.801	0.499378	0.225412	2.2154	0.0267326	0.322239	0.0267326	217.536	246.331	311.539	244.105	243.687	195.584	170.823	258.469	243.896	183.203	Protein proposed to be associated with the nuclear pore complex; null mutant is viable, displays elevated frequency of mitochondrial genome loss and is sensitive to freeze-thaw stress	GO:0003674,GO:0005737,GO:0008150
YOL151W	GRE2	chrXV	43694	44722	0	776.584	-0.320777	0.146498	-2.18963	0.0285512	0.322239	0.0267674	716.588	729.302	669.518	823.274	735.783	882.512	879.112	705.136	779.528	880.812	3-methylbutanal reductase and NADPH-dependent methylglyoxal reductase; stress induced (osmotic, ionic, oxidative, heat shock and heavy metals); regulated by the HOG pathway; restores resistance to glycolaldehyde by coupling reduction of glycolaldehyde to ethylene glycol and oxidation of NADPH to NADP+; protein abundance increases in response to DNA replication stress; methylglyoxal reductase (NAD…	GO:0005634,GO:0005737,GO:0008204,GO:0030447,GO:0043892,GO:0046568
YGR236C	SPG1	chrVII	962530	962817	1	22.9539	-1.30226	0.561119	-2.32082	0.0202963	0.322395	0.0268834	13.9595	15.3452	12.5777	30.6291	18.8905	45.3182	23.9568	13.9608	24.7598	34.6375	Protein required for high temperature survival during stationary phase; not required for growth on nonfermentable carbon sources; the authentic, non-tagged protein is detected in highly purified mitochondria in high-throughput studies	GO:0003674,GO:0005739,GO:0008150
YKR013W	PRY2	chrXI	463959	464948	0	8422.95	-0.265693	0.132301	-2.00824	0.0446173	0.322395	0.0268764	8345.46	7478.78	8600.22	7619.23	7341.78	10468.5	9106.72	8141.48	7480.5	9787.61	Sterol binding protein involved in the export of acetylated sterols; secreted glycoprotein and member of the CAP protein superfamily (cysteine-rich secretory proteins (CRISP), antigen 5, and pathogenesis related 1 proteins); sterol export function is redundant with that of PRY1; may be involved in detoxification of hydrophobic compounds; PRY2 has a paralog, PRY1, that arose from the whole genome …	GO:0000324,GO:0005576,GO:0015918,GO:0032934
YML099C	ARG81	chrXIII	74398	77040	1	841.905	-0.362974	0.164078	-2.2122	0.0269527	0.322608	0.0269527	775.916	741.416	732.407	956.928	757.507	1037.55	891.611	749.913	857.218	964.579	Zinc finger transcription factor involved in arginine-responsive genes; Zn(2)-Cys(6) binuclear cluster domain type; involved in the regulation of arginine-responsive genes; acts with Arg80p and Arg82p	GO:0000821,GO:0003712,GO:0005634
YAL023C	PMT2	chrI	106272	108551	1	11547.6	-0.368572	0.193763	-1.90218	0.0571478	0.323063	0.0270423	10531.3	9737.75	12048.4	9377.15	11321.1	16983.6	10833.7	10772.5	10349.1	13908.6	Protein O-mannosyltransferase of the ER membrane; transfers mannose residues from dolichyl phosphate-D-mannose to protein serine/threonine residues; involved in ER quality control; acts in a complex with Pmt1p, can instead interact with Pmt5p; antifungal drug target; PMT2 has a paralog, PMT3, that arose from the whole genome duplication	GO:0004169,GO:0006493,GO:0016021,GO:0032527,GO:0035269,GO:0071712,GO:0097582,GO:0097584,GO:1900101
YML094W	GIM5	chrXIII	82275	82849	0	635.578	0.389999	0.176559	2.20889	0.0271822	0.323499	0.0271822	665.403	773.722	612.435	633.002	720.671	478.226	565.59	683.854	676.836	521.908	Subunit of the heterohexameric cochaperone prefoldin complex; prefoldin binds specifically to cytosolic chaperonin and transfers target proteins to it; prefoldin complex also localizes to chromatin of actively transcribed genes in the nucleus and facilitates transcriptional elongation	GO:0005737,GO:0007021,GO:0015631,GO:0016272,GO:0032968
YNR069C	BSC5	chrXIV	761123	762592	1	142.667	-0.65109	0.303207	-2.14735	0.0317656	0.323499	0.0271643	168.677	99.3401	99.6538	144.792	102.953	213.472	169.781	122.557	123.873	191.627	Protein of unknown function; shows homology with N-terminal end of Bul1p; ORF exhibits genomic organization compatible with a translational readthrough-dependent mode of expression; readthrough expression includes YNR068C and the locus for this readthrough is termed BUL3; Bul3p is involved in ubiquitin-mediated sorting of plasma membrane proteins; readthrough and shortened forms of Bul3p interact…	GO:0003674,GO:0005575,GO:0008150
YLR283W	YLR283W	chrXII	705186	706130	0	478.915	0.375965	0.170279	2.20794	0.0272486	0.323674	0.0272486	509.522	475.702	530.197	529.048	528.933	426.945	352.061	505.14	528.991	389.503	Putative protein of unknown function; green fluorescent protein (GFP)-fusion protein localizes to mitochondria; YLR283W is not an essential gene	GO:0003674,GO:0005739,GO:0008150
YBR285W	YBR285W	chrII	773922	774356	0	114.566	-0.715584	0.3094	-2.31281	0.0207331	0.324362	0.027462	93.0634	101.763	84.1736	103.025	113.343	200.354	106.243	93	108.184	153.299	Putative protein of unknown function; YBR285W is not an essential gene	GO:0003674,GO:0005575,GO:0008150
YDL021W	GPM2	chrIV	413953	414888	0	844.348	-0.325108	0.154326	-2.10663	0.0351497	0.324362	0.0274225	630.505	749.493	747.887	1032.11	971.914	851.505	927.026	709.295	1002.01	889.265	Homolog of Gpm1p phosphoglycerate mutase; converts 3-phosphoglycerate to 2-phosphoglycerate in glycolysis; may be non-functional; GPM2 has a paralog, GPM3, that arose from the whole genome duplication	GO:0003674,GO:0004619,GO:0005737,GO:0008150
YKL046C	DCW1	chrXI	351275	352624	1	3120.43	-0.362872	0.173042	-2.09702	0.0359922	0.324362	0.0273632	2830.29	2916.4	3202.47	2334.31	2885.52	4455.49	3218.55	2983.05	2609.91	3837.02	Putative mannosidase; GPI-anchored membrane protein required for cell wall biosynthesis in bud formation;homologous to Dfg5p	GO:0003674,GO:0005783,GO:0005933,GO:0007117,GO:0009272,GO:0046658
YPR004C	AIM45	chrXVI	564007	565041	1	3291.43	0.255335	0.134939	1.89223	0.0584609	0.32613	0.0276637	3379.37	3558.48	3331.14	3669.93	3366.28	2630.84	3103.97	3423	3518.1	2867.41	Putative ortholog of mammalian ETF-alpha; interacts with frataxin, Yfh1p; null mutant displays elevated frequency of mitochondrial genome loss; may have a role in oxidative stress response; ETF-alpha is an electron transfer flavoprotein complex subunit	GO:0003674,GO:0005739,GO:0008150
YOL141W	PPM2	chrXV	56452	58539	0	124.638	-0.759402	0.32932	-2.30597	0.0211122	0.329052	0.0279641	124.472	88.8407	72.5634	173.565	91.6187	160.999	160.407	95.2922	132.592	160.703	AdoMet-dependent tRNA methyltransferase; also involved in methoxycarbonylation; required for the synthesis of wybutosine (yW), a modified guanosine found at the 3'-position adjacent to the anticodon of phe-tRNA; similarity to Ppm1p	GO:0005737,GO:0005739,GO:0008175,GO:0030488,GO:0031591
YDL156W	CMR1	chrIV	174918	176486	0	223.903	-0.683064	0.320144	-2.13361	0.0328747	0.329561	0.0281127	229.169	205.949	119.004	273.806	146.401	339.886	253.109	184.707	210.103	296.498	DNA-binding protein with preference for UV-damaged DNA; protein sequence contains three WD domains (WD-40 repeat); green fluorescent protein (GFP)-fusion protein localizes to the cytoplasm and nucleus; potential regulatory target of Mbp1p, which binds to the promoter region; co-localizes with Hos2p in nuclear foci in response to DNA damage by MMS	GO:0000790,GO:0003677,GO:0005634,GO:0005737,GO:0008150
YJL127W-A	YJL127W-A	chrX	180194	180310	0	30.861	-1.01879	0.477345	-2.13428	0.0328202	0.329561	0.0280662	34.8988	22.614	16.4477	24.132	18.8905	50.0885	48.9553	24.6535	21.5112	49.5219	Dubious open reading frame; unlikely to encode a functional protein, based on available experimental and comparative sequence data	GO:0003674,GO:0005575,GO:0008150
YER055C	HIS1	chrV	264892	265785	1	10282.9	0.284858	0.136833	2.0818	0.0373611	0.331732	0.0284039	11024.5	11545.3	10792.6	9827.31	10535.2	8163.23	10092.1	11120.8	10181.3	9127.66	ATP phosphoribosyltransferase; a hexameric enzyme, catalyzes the first step in histidine biosynthesis; mutations cause histidine auxotrophy and sensitivity to Cu, Co, and Ni salts; transcription is regulated by general amino acid control	GO:0000105,GO:0003879,GO:0005575
YPR203W	YPR203W	chrXVI	943880	944188	0	26.8597	-1.13327	0.516928	-2.19232	0.0283564	0.331732	0.0283564	23.2659	21.8064	14.5127	24.132	17.0014	56.0514	31.2481	19.8616	20.5667	43.6497	Putative protein of unknown function	GO:0003674,GO:0005575,GO:0008150
YJL105W	SET4	chrX	225055	226737	0	266.739	0.428511	0.19576	2.18896	0.0285995	0.333394	0.0285995	288.497	258.446	293.156	322.998	288.079	217.05	198.946	280.033	305.539	207.998	Protein of unknown function, contains a SET domain; SET4 has a paralog, SET3, that arose from the whole genome duplication	GO:0003674,GO:0005575,GO:0008150
YGL257C	MNT2	chrVII	12481	14157	1	2513.82	-0.378514	0.20177	-1.87596	0.0606602	0.333777	0.0287044	2304.48	2205.67	2734.19	1826.61	2246.08	3849.66	2430.06	2414.78	2036.34	3139.86	Mannosyltransferase; involved in adding the 4th and 5th mannose residues of O-linked glycans	GO:0000033,GO:0005794,GO:0006493
YML118W	NGL3	chrXIII	32334	33851	0	210.593	-0.520296	0.244873	-2.12476	0.033607	0.333777	0.0287389	230.332	170.413	185.762	196.769	131.289	298.146	261.442	195.502	164.029	279.794	3'-5' exonuclease specific for poly-A RNAs; has a domain similar to a magnesium-dependent endonuclease motif in mRNA deadenylase Ccr4p; similar to Ngl1p; NGL3 has a paralog, NGL2, that arose from the whole genome duplication	GO:0004519,GO:0004535,GO:0005575,GO:0043633
YGR189C	CRH1	chrVII	876669	878192	1	12660.1	-0.312073	0.149521	-2.08716	0.0368739	0.333817	0.0287957	12293.7	11638.9	13463.9	10482.6	9789.03	17453.5	13499.2	12465.5	10135.8	15476.3	Chitin transglycosylase; functions in the transfer of chitin to beta(1-6) and beta(1-3) glucans in the cell wall; similar and functionally redundant to Utr2; localizes to sites of polarized growth; expression induced by cell wall stress	GO:0000131,GO:0006037,GO:0009277,GO:0016757,GO:0031505
YIR026C	YVH1	chrIX	404873	405967	1	1077.12	0.398632	0.173399	2.29893	0.021509	0.334637	0.0289734	1122.58	1289.81	992.667	1185.25	1227.88	756.098	965.565	1135.02	1206.57	860.831	Protein phosphatase; involved in vegetative growth at low temperatures, sporulation, and glycogen accumulation; mutants are defective in 60S ribosome assembly; member of the dual-specificity family of protein phosphatases	GO:0000027,GO:0004725,GO:0005634,GO:0005737,GO:0006470,GO:0007126,GO:0008138,GO:0019933,GO:0030476,GO:0030687
YNL339C	YRF1-6	chrXIV	371	6098	1	1589.27	-0.321123	0.147013	-2.18431	0.0289392	0.334637	0.0289392	1537.87	1453.76	1444.5	1625.2	1368.61	1985.65	1709.27	1478.71	1496.91	1847.46	Helicase encoded by the Y' element of subtelomeric regions; highly expressed in the mutants lacking the telomerase component TLC1; potentially phosphorylated by Cdc28p	GO:0000722,GO:0003678,GO:0005634
YGR088W	CTT1	chrVII	654634	656322	0	603.552	-0.359265	0.16468	-2.18159	0.0291396	0.334705	0.0291396	563.034	517.699	592.117	595.876	527.044	658.306	770.785	557.617	561.46	714.546	Cytosolic catalase T; has a role in protection from oxidative damage by hydrogen peroxide	GO:0000302,GO:0004096,GO:0005737,GO:0071472
YGR271C-A	EFG1	chrVII	1037800	1038501	1	997.723	0.457569	0.212194	2.15637	0.0310546	0.334705	0.0291145	1001.6	1172.7	1125.22	837.196	1243.94	949.296	654.126	1099.84	1040.57	801.711	Essential protein required for maturation of 18S rRNA; null mutant is sensitive to hydroxyurea and is delayed in recovering from alpha-factor arrest; green fluorescent protein (GFP)-fusion protein localizes to the nucleolus	GO:0000321,GO:0000462,GO:0003674,GO:0005730
YIL088C	AVT7	chrIX	197931	199403	1	3308.11	-0.380858	0.203596	-1.87066	0.0613925	0.334705	0.0290509	2793.07	2816.25	3715.25	2558	3178.32	4866.93	3228.97	3108.19	2868.16	4047.95	Putative transporter; member of a family of seven S. cerevisiae genes (AVT1-7) related to vesicular GABA-glycine transporters	GO:0000324,GO:0005886,GO:0006865,GO:0015171,GO:0016021
YLR089C	ALT1	chrXII	318237	320015	1	3845.46	0.300147	0.152227	1.9717	0.0486436	0.335951	0.0293018	4226.24	4334.62	4053.88	3758.1	3716.7	2912.29	3916.42	4204.91	3737.4	3414.36	Alanine transaminase (glutamic pyruvic transaminase); involved in alanine biosynthesis and catabolism; TOR1-independent role in determining chronological lifespan; expression is induced in the presence of alanine; repression is mediated by Nrg1p; ALT1 has a paralog, ALT2, that arose from the whole genome duplication; Alt2p is catalytically inactive	GO:0001300,GO:0004021,GO:0005739,GO:0006523,GO:0006524
YLR003C	CMS1	chrXII	156855	157730	1	1002.35	0.371057	0.15622	2.37522	0.0175386	0.336473	0.029401	928.308	1079.82	1107.8	1057.17	1236.38	788.298	818.699	1038.64	1146.77	803.498	Putative subunit of the 90S preribosome processome complex; overexpression rescues supressor mutant of mcm10; null mutant is viable; relocalizes from nucleus to cytoplasm upon DNA replication stress	GO:0003674,GO:0005634,GO:0005737,GO:0008150,GO:0030686
YBR088C	POL30	chrII	424990	425766	1	814.992	0.435904	0.183815	2.37143	0.0177195	0.338089	0.0297043	882.939	1056.4	831.093	686.835	882.184	624.914	740.579	923.476	784.51	682.746	Proliferating cell nuclear antigen (PCNA); functions as the sliding clamp for DNA polymerase delta; may function as a docking site for other proteins required for mitotic and meiotic chromosomal DNA replication and for DNA repair	GO:0000278,GO:0000710,GO:0005634,GO:0005657,GO:0006272,GO:0006273,GO:0006289,GO:0006298,GO:0006301,GO:0006348,GO:0007064,GO:0030337,GO:0030466,GO:0034087,GO:0035753,GO:0043626,GO:0070987,GO:1902394,GO:1903022
YJR161C	COS5	chrX	742848	743999	1	604.007	-0.584525	0.255276	-2.28978	0.0220342	0.338089	0.0296809	510.686	520.122	632.753	441.802	458.094	1119.84	544.758	554.52	449.948	832.297	Protein of unknown function; member the DUP380 subfamily of conserved, often subtelomerically-encoded proteins	GO:0000324,GO:0003674,GO:0008150,GO:0016021
YOR252W	TMA16	chrXV	803667	804203	0	772.599	0.340711	0.156669	2.17472	0.0296513	0.338089	0.0296513	781.733	878.716	764.335	844.621	862.349	587.944	688.499	808.261	853.485	638.221	Protein of unknown function that associates with ribosomes	GO:0003674,GO:0005634,GO:0005840,GO:0008150
YDL100C	GET3	chrIV	282112	283176	1	7242.94	0.221526	0.119191	1.85858	0.0630873	0.338549	0.0298529	7391.56	7722.68	7451.78	7602.52	7629.86	6111.99	6790.2	7522.01	7616.19	6451.1	Guanine nucleotide exchange factor for Gpa1p; amplifies G protein signaling; functions as a chaperone under ATP-depleted oxidative stress conditions; subunit of the GET complex, which is involved in ATP dependent Golgi to ER trafficking and insertion of tail-anchored (TA) proteins into the ER membrane under non-stress conditions; has low-level ATPase activity; protein abundance increases in respo…	GO:0000750,GO:0005085,GO:0005783,GO:0006620,GO:0006890,GO:0009408,GO:0010038,GO:0016887,GO:0043529,GO:0045048,GO:0051082,GO:1990507
YLR241W	CSC1	chrXII	620473	622821	0	2389.81	-0.392525	0.18071	-2.17212	0.0298464	0.338549	0.0298464	2199.79	2078.07	2477.8	1913.86	2145.96	3521.7	2391.52	2251.88	2029.91	2956.61	Calcium permeable gated cation channel; may be involved in detoxification; similar to Arabidopsis CSC1	GO:0000329,GO:0005227,GO:0006812,GO:0016021
YOL058W	ARG1	chrXV	219211	220473	0	19429	0.333427	0.169937	1.96207	0.0497547	0.339274	0.029971	20924.1	21418.7	20318.7	20177.2	20011.6	13224.6	19927.9	20887.2	20094.4	16576.2	Arginosuccinate synthetase; catalyzes the formation of L-argininosuccinate from citrulline and L-aspartate in the arginine biosynthesis pathway; potential Cdc28p substrate	GO:0004055,GO:0005829,GO:0006526
YBL074C	AAR2	chrII	86722	87789	1	117.631	-0.665868	0.31609	-2.10658	0.0351543	0.339517	0.0300621	123.309	102.571	65.7908	124.373	99.1749	180.08	128.117	97.2235	111.774	154.099	Component of the U5 snRNP complex; required for splicing of U3 precursors; originally described as a splicing factor specifically required for splicing pre-mRNA of the MATa1 cistron	GO:0000244,GO:0003674,GO:0005682
YMR253C	YMR253C	chrXIII	775946	777190	1	679.795	-0.422127	0.178374	-2.36652	0.0179561	0.339517	0.0301009	652.607	630.769	551.482	629.289	654.554	940.948	698.915	611.619	641.922	819.932	Putative protein of unknown function; green fluorescent protein (GFP)-fusion protein localizes to the cytoplasm in a punctate pattern; YMR253C is not an essential gene	GO:0003674,GO:0005737,GO:0008150,GO:0016021
YDR123C	INO2	chrIV	698554	699468	1	461.454	-0.385737	0.183259	-2.10488	0.0353021	0.339893	0.0301886	458.337	368.285	442.153	474.287	383.476	564.092	539.55	422.925	428.882	551.821	Transcription factor; component of the heteromeric Ino2p/Ino4p basic helix-loop-helix transcription activator that binds inositol/choline-responsive elements (ICREs), required for derepression of phospholipid biosynthetic genes in response to inositol depletion; involved in diauxic shift	GO:0001077,GO:0005634,GO:0008654,GO:0045944
YLR414C	PUN1	chrXII	953353	954144	1	7860.16	-0.411924	0.200489	-2.0546	0.0399177	0.34107	0.0303476	7855.72	6319.81	9935.38	4385.53	5139.15	12270.5	9115.06	8036.97	4762.34	10692.8	Plasma membrane protein with a role in cell wall integrity; co-localizes with Sur7p in punctate membrane patches; null mutant displays decreased thermotolerance; transcription induced upon cell wall damage and metal ion stress	GO:0003674,GO:0005737,GO:0005886,GO:0005933,GO:0016021,GO:0031505,GO:0045121,GO:0051259
YML089C	YML089C	chrXIII	91041	91409	1	5.06285	-2.97816	1.37643	-2.16368	0.0304892	0.342047	0.0304892	0	1.61529	2.90254	6.49709	0	11.9258	12.4992	1.50594	3.24854	12.2125	Dubious open reading frame; unlikely to encode a functional protein, based on available experimental and comparative sequence data; expression induced by calcium shortage	GO:0003674,GO:0005575,GO:0008150
YGL117W	YGL117W	chrVII	288512	289309	0	1266.98	0.46319	0.182575	2.53699	0.0111809	0.343031	0.0306865	1212.15	1459.41	1363.22	1190.82	1690.7	1041.13	911.402	1344.93	1440.76	976.263	Putative protein of unknown function	GO:0003674,GO:0005575,GO:0008150
YKL071W	YKL071W	chrXI	305114	305884	0	246.682	-0.453305	0.199591	-2.27117	0.0231365	0.343031	0.0306454	237.312	215.641	206.08	213.476	253.132	313.649	287.482	219.678	233.304	300.566	Putative protein of unknown function; expression induced in cells treated with the mycotoxin patulin, and also the quinone methide triterpene celastrol; green fluorescent protein (GFP)-fusion protein localizes to the cytoplasm	GO:0003674,GO:0005737,GO:0008150,GO:0016021
YDR199W	YDR199W	chrIV	854175	854540	0	108.307	0.796736	0.359529	2.21605	0.0266878	0.343331	0.030793	104.696	138.107	148.029	64.9709	152.068	76.3253	73.9537	130.278	108.52	75.1395	Dubious open reading frame; unlikely to encode a functional protein, based on available experimental and comparative sequence data; partially overlaps the verified gene VPS64/YDR200C; computationally predicted to have thiol-disulfide oxidoreductase activity	GO:0003674,GO:0005575,GO:0008150
YGR244C	LSC2	chrVII	978036	979319	1	8262.24	-0.272325	0.139649	-1.95006	0.0511689	0.343331	0.030823	8559.51	8222.61	7647.22	7151.44	6587.1	8838.24	10829.5	8143.11	6869.27	9833.88	Beta subunit of succinyl-CoA ligase; succinyl-CoA ligase is a mitochondrial enzyme of the TCA cycle that catalyzes the nucleotide-dependent conversion of succinyl-CoA to succinate	GO:0004775,GO:0005739,GO:0006099,GO:0006104
YHR079C	IRE1	chrVIII	258244	261591	1	1470.4	-0.403584	0.177439	-2.27449	0.0229364	0.343536	0.0308963	1320.34	1392.38	1471.59	1262.29	1154.21	2193.16	1498.86	1394.77	1208.25	1846.01	Serine-threonine kinase and endoribonuclease; transmembrane protein that mediates the unfolded protein response (UPR) by regulating Hac1p synthesis through HAC1 mRNA splicing; role in homeostatic adaptation to ER stress; Kar2p binds inactive Ire1p and releases from it upon ER stress	GO:0004521,GO:0004672,GO:0004674,GO:0005634,GO:0006020,GO:0006468,GO:0030176,GO:0030968,GO:0031505,GO:0036290,GO:0042803,GO:0051082,GO:0051260
YBR009C	HHF1	chrII	255373	255684	1	15957.2	0.282241	0.130885	2.1564	0.0310523	0.344056	0.0310523	15025.1	16977.5	16433.2	18898.2	17813.7	12295.5	14257.4	16145.2	18355.9	13276.5	Histone H4; core histone protein required for chromatin assembly and chromosome function; one of two identical histone proteins (see also HHF2); contributes to telomeric silencing; N-terminal domain involved in maintaining genomic integrity	GO:0000788,GO:0003677,GO:0006333,GO:0031298,GO:0034729,GO:0043935,GO:0061587
YGL038C	OCH1	chrVII	425362	426804	1	3784.65	-0.338689	0.165611	-2.04509	0.0408456	0.344056	0.031053	3596.9	3231.38	3887.46	3580.82	3161.32	5190.12	3844.55	3571.92	3371.07	4517.34	Mannosyltransferase of the cis-Golgi apparatus; initiates the polymannose outer chain elongation of N-linked oligosaccharides of glycoproteins	GO:0000009,GO:0000137,GO:0006487,GO:0016757
YDR450W	RPS18A	chrIV	1359923	1360798	0	33494.7	0.316506	0.172155	1.8385	0.0659888	0.344752	0.0312259	34763.8	37662	39459	25101	37579.7	30663.7	29233.6	37295	31340.4	29948.6	Protein component of the small (40S) ribosomal subunit; homologous to mammalian ribosomal protein S18 and bacterial S13; RPS18A has a paralog, RPS18B, that arose from the whole genome duplication; protein increases in abundance and relocalizes from cytoplasm to nuclear foci upon DNA replication stress	GO:0000447,GO:0002181,GO:0003735,GO:0005737,GO:0005739,GO:0006407,GO:0022627
YJR053W	BFA1	chrX	534027	535751	0	110.097	-0.80105	0.353766	-2.26435	0.0235524	0.344752	0.0311963	115.166	83.9949	64.8233	132.726	68.0056	178.888	127.075	87.9947	100.366	152.981	Component of the GTPase-activating Bfa1p-Bub2p complex; involved in multiple cell cycle checkpoint pathways that control exit from mitosis; specifically required when telomeres are damaged, but not for all types of chromosomal DNA damage; phosphorylated by the Polo-like kinase Cdc5p	GO:0005096,GO:0005816,GO:0007096,GO:0031578
YGL006W-A	YGL006W-A	chrVII	485423	485533	0	3.14922	-3.42992	1.59483	-2.15064	0.0315044	0.345166	0.0313186	1.16329	0	0.967512	2.78447	2.83357	5.96292	8.33281	0.710268	2.80902	7.14787	Putative protein of unknown function; identified by SAGE	GO:0003674,GO:0005575,GO:0008150
YDR002W	YRB1	chrIV	453045	453650	0	11480.2	0.305419	0.149042	2.04921	0.0404414	0.345632	0.0315817	11845.8	11596.9	13608.1	10253.3	13069.4	9859.09	10128.5	12350.3	11661.3	9993.81	Ran GTPase binding protein; involved in nuclear protein import and RNA export, ubiquitin-mediated protein degradation during the cell cycle; shuttles between the nucleus and cytoplasm; is essential; homolog of human RanBP1	GO:0000082,GO:0005634,GO:0005737,GO:0006405,GO:0006511,GO:0006606,GO:0008536
YIR033W	MGA2	chrIX	416124	419465	0	2065.78	0.265026	0.123223	2.15078	0.0314932	0.345632	0.0314932	2225.38	2128.14	2262.04	2060.5	2114.79	1818.69	1850.93	2205.19	2087.65	1834.81	ER membrane protein involved in regulation of OLE1 transcription; inactive ER form dimerizes and one subunit is then activated by ubiquitin/proteasome-dependent processing followed by nuclear targeting; MGA2 has a paralog, SPT23, that arose from the whole genome duplication	GO:0003674,GO:0005634,GO:0030176,GO:0030466,GO:0036083,GO:0045944,GO:0048255,GO:0061399,GO:0061419,GO:0070417
YOL114C	YOL114C	chrXV	103317	103925	1	118.718	0.59694	0.264047	2.26074	0.0237756	0.345632	0.0314919	140.758	122.762	152.867	104.882	126.566	89.4438	93.7442	138.796	115.724	91.594	Putative protein of unknown function with similarity to human ICT1; has prokaryotic factors that may function in translation termination; YOL114C is not an essential gene	GO:0003674,GO:0005575,GO:0008150
YOR336W	KRE5	chrXV	949773	953870	0	1810.47	-0.513155	0.207107	-2.47773	0.013222	0.345632	0.0315497	1641.41	1405.3	1835.37	1589.93	1555.63	2896.79	1748.85	1627.36	1572.78	2322.82	Protein required for beta-1,6 glucan biosynthesis; mutations result in aberrant morphology and severe growth defects	GO:0003980,GO:0005783,GO:0006078
YMR188C	MRPS17	chrXIII	636291	637004	1	1407.27	0.353201	0.164427	2.14807	0.031708	0.346409	0.031708	1284.28	1410.14	1671.86	1512.89	1691.64	1225.98	1054.1	1455.43	1602.27	1140.04	Mitochondrial ribosomal protein of the small subunit	GO:0003735,GO:0005739,GO:0005763,GO:0032543
YGR082W	TOM20	chrVII	644044	644595	0	2701.67	0.2733	0.134394	2.03358	0.0419944	0.348187	0.0319264	2751.19	2867.94	2726.45	3014.65	2948.8	2096.56	2506.09	2781.86	2981.72	2301.33	Component of the TOM (translocase of outer membrane) complex; responsible for recognition and initial import steps for all mitochondrially directed proteins; acts as a receptor for incoming precursor proteins	GO:0005739,GO:0005741,GO:0005742,GO:0015266,GO:0016021,GO:0016031,GO:0030150,GO:0030943,GO:0031307,GO:0070096
YML036W	CGI121	chrXIII	205642	206293	0	930.46	0.452766	0.211195	2.14383	0.0320467	0.348891	0.0320467	882.939	1028.13	1181.33	769.441	1143.82	850.312	657.251	1030.8	956.629	753.781	Component of the EKC/KEOPS complex; EKC/KEOPS complex is required for t6A tRNA modification and telomeric TG1-3 recombination; may have role in transcription; Cgi121p is dispensable for tRNA modification; other complex members are Bud32p, Kae1p, Pcc1p, and Gon7p	GO:0000408,GO:0000722,GO:0000723,GO:0003674,GO:0006310,GO:0045944
YDR319C	YFT2	chrIV	1105003	1105827	1	1116.35	-0.448273	0.187298	-2.39337	0.0166943	0.349397	0.032154	1116.76	944.135	1161.01	787.076	874.628	1734.02	1196.8	1073.97	830.852	1465.41	Protein required for normal ER membrane biosynthesis; member of the highly conserved FIT family of proteins involved in triglyceride droplet biosynthesis and homologous to human FIT2; interacts with Sst2p and Hsp82p in high-throughput two-hybrid screens	GO:0003674,GO:0008654,GO:0016021
YHR104W	GRE3	chrVIII	323409	324392	0	3942.88	-0.251419	0.123177	-2.04112	0.0412394	0.349397	0.0322048	3679.5	3556.86	3853.6	3826.78	3883.88	4188.35	4611.17	3696.65	3855.33	4399.76	Aldose reductase; involved in methylglyoxal, d-xylose, arabinose, and galactose metabolism; stress induced (osmotic, ionic, oxidative, heat shock, starvation and heavy metals); regulated by the HOG pathway; protein abundance increases in response to DNA replication stress	GO:0003729,GO:0004032,GO:0005634,GO:0005737,GO:0019388,GO:0019568,GO:0032866,GO:0034599,GO:0042843,GO:0071470
HRA1		chrI	99305	99868	0	50.0567	-1.33706	0.610172	-2.19129	0.0284311	0.350044	0.0328044	39.552	34.7287	30.9604	61.2582	6.61166	116.873	60.4129	35.0803	33.935	88.643	Non-protein-coding RNA; substrate of RNase P, possibly involved in rRNA processing, specifically maturation of 20S precursor into the mature 18S rRNA	GO:0000462,GO:0003674,GO:0005575
YDL186W	YDL186W	chrIV	125616	126449	0	109.36	0.65533	0.298532	2.19517	0.0281513	0.350044	0.0324816	124.472	129.223	137.387	111.379	98.2304	59.6292	105.202	130.361	104.804	82.4155	Putative protein of unknown function; YDL186W is not an essential gene	GO:0003674,GO:0005575,GO:0008150
YDR399W	HPT1	chrIV	1270068	1270733	0	3155.14	0.274437	0.134722	2.03707	0.0416434	0.350044	0.0325203	2960.58	3332.34	3204.4	3669	3682.69	2820.46	2416.52	3165.77	3675.85	2618.49	Dimeric hypoxanthine-guanine phosphoribosyltransferase; catalyzes the transfer of the phosphoribosyl portion of 5-phosphoribosyl-alpha-1-pyrophosphate to a purine base (either guanine or hypoxanthine) to form pyrophosphate and a purine nucleotide (either guanosine monophosphate or inosine monophosphate); mutations in the human homolog HPRT1 can cause Lesch-Nyhan syndrome and Kelley-Seegmiller syn…	GO:0004422,GO:0005634,GO:0005737,GO:0032263,GO:0032264
YHR028C	DAP2	chrVIII	164978	167434	1	3896.27	-0.353464	0.183637	-1.92479	0.0542551	0.350044	0.032682	3572.47	3358.99	4089.67	3242.97	3621.3	5639.73	3748.72	3673.71	3432.14	4694.23	Dipeptidyl aminopeptidase; synthesized as a glycosylated precursor; localizes to the vacuolar membrane; similar to Ste13p	GO:0000329,GO:0008239,GO:0016485
YHR080C	LAM4	chrVIII	262801	266838	1	1557.28	-0.467016	0.218679	-2.13563	0.03271	0.350044	0.03271	1468.08	1379.45	1438.69	1277.14	1386.56	2568.82	1382.21	1428.74	1331.85	1975.52	Protein of unknown function; may interact with ribosomes, based on co-purification experiments; the authentic, non-tagged protein is detected in highly purified mitochondria in high-throughput studies; may have a role in intracellular sterol transport	GO:0003674,GO:0005739,GO:0005840,GO:0008150
YKL121W	DGR2	chrXI	214142	216700	0	716.849	-0.382934	0.163855	-2.33703	0.0194376	0.350044	0.0325844	650.281	663.075	609.533	788.932	633.775	884.897	787.451	640.963	711.353	836.174	Protein of unknown function; null mutant is resistant to 2-deoxy-D-glucose and displays abnormally elongated buds; DGR2 has a paralog, YMR102C, that arose from the whole genome duplication	GO:0003674,GO:0005575,GO:0008150
YKR010C	TOF2	chrXI	458924	461239	1	944.333	0.285975	0.140728	2.03212	0.0421414	0.350044	0.0328771	993.452	969.979	902.689	1089.65	1088.09	756.098	810.366	955.373	1088.87	783.232	Protein required for rDNA silencing and mitotic rDNA condensation; stimulates Cdc14p phosphatase activity and biphasic release to promote rDNA repeat segregation; required for condensin recruitment to the replication fork barrier site; TOF2 has a paralog, NET1, that arose from the whole genome duplication	GO:0000183,GO:0005730,GO:0005739,GO:0007000,GO:0019211,GO:0034503,GO:0070550
YMR001C-A	YMR001C-A	chrXIII	271347	271577	1	26.4997	-1.39559	0.653759	-2.13471	0.0327844	0.350044	0.032591	13.9595	21.8064	13.5452	23.2039	25.5021	73.9402	13.5408	16.437	24.353	43.7405	Putative protein of unknown function	GO:0003674,GO:0005575,GO:0008150
YNL178W	RPS3	chrXIV	302680	303402	0	45786.6	0.281481	0.154465	1.8223	0.0684099	0.350044	0.0323716	50677.7	51608.4	50583.5	37762	46027.5	36310.6	47536.6	50956.5	41894.8	41923.6	Protein component of the small (40S) ribosomal subunit; has apurinic/apyrimidinic (AP) endonuclease activity; essential for viability; homologous to mammalian ribosomal protein S3 and bacterial S3	GO:0000056,GO:0002181,GO:0003735,GO:0003906,GO:0006407,GO:0022627,GO:0030686,GO:0030688
YNL327W	EGT2	chrXIV	24048	27173	0	9033.81	-0.345679	0.17007	-2.03257	0.0420964	0.350044	0.0328742	8423.4	7970.63	8967.87	7751.02	8636.72	12742.8	8744.25	8453.97	8193.87	10743.5	Glycosylphosphatidylinositol (GPI)-anchored cell wall endoglucanase; required for proper cell separation after cytokinesis; expression is activated by Swi5p and tightly regulated in a cell cycle-dependent manner	GO:0000920,GO:0005933,GO:0008810,GO:0009277,GO:0030428
YPL017C	IRC15	chrXVI	518734	520233	1	548.394	-0.32302	0.1514	-2.13355	0.0328795	0.350044	0.0328795	496.726	496.701	483.756	566.175	563.88	595.099	636.419	492.394	565.027	615.759	Microtubule associated protein; regulates microtubule dynamics; required for accurate meiotic chromosome segregation; null mutant displays large budded cells due to delayed mitotic progression, increased levels of spontaneous Rad52 foci; IRC15 has a paralog, LPD1, that arose from the whole genome duplication	GO:0005737,GO:0005874,GO:0006312,GO:0007020,GO:0008017,GO:0008757,GO:0034453,GO:0045144,GO:0045931,GO:0051315
YBR016W	YBR016W	chrII	270247	270633	0	3856.43	-0.323697	0.160805	-2.01298	0.0441165	0.350547	0.0335397	4241.37	3485.79	4490.22	2547.79	2038.28	4932.52	5259.05	4072.46	2293.03	5095.79	Tail-anchored plasma membrane protein with a conserved CYSTM module; predicted to be palmitoylated; has similarity to hydrophilins, which are involved in the adaptive response to hyperosmotic conditions; YBR016W has a paralog, YDL012C, that arose from the whole genome duplication	GO:0003674,GO:0005886,GO:0008150,GO:0033101,GO:0070250
YDR419W	RAD30	chrIV	1303174	1305072	0	715.885	-0.323417	0.15366	-2.10476	0.0353126	0.350547	0.0331064	652.607	705.072	654.038	633.93	685.724	902.786	777.035	670.573	659.827	839.91	DNA polymerase eta; involved in translesion synthesis during post-replication repair; catalyzes the synthesis of DNA opposite cyclobutane pyrimidine dimers and other lesions; involved in formation of post-replicative damage-induced genome-wide cohesion; may also have a role in protection against mitochondrial mutagenesis; mutations in human pol eta are responsible for XPV	GO:0003887,GO:0005634,GO:0005657,GO:0005739,GO:0007059,GO:0007064,GO:0042276,GO:0070987
YER014W	HEM14	chrV	182600	184219	0	690.352	-0.414217	0.204506	-2.02545	0.0428209	0.350547	0.0334072	718.915	607.348	529.229	791.716	538.378	790.683	856.197	618.497	665.047	823.44	Protoporphyrinogen oxidase; a mitochondrial enzyme that catalyzes the seventh step in the heme biosynthetic pathway, converting protoporphyrinogen IX to protoporphyrin IX; inhibited by diphenyl ether-type herbicides	GO:0004729,GO:0005739,GO:0005743,GO:0006783
YGL147C	RPL9A	chrVII	227754	228329	1	26868.5	0.391144	0.192936	2.02733	0.0426289	0.350547	0.03329	27133.8	29880.4	34627.3	19212.8	30638.4	24122.4	22464.2	30547.1	24925.6	23293.3	Ribosomal 60S subunit protein L9A; homologous to mammalian ribosomal protein L9 and bacterial L6; RPL9A has a paralog, RPL9B, that arose from a single-locus duplication	GO:0002181,GO:0003735,GO:0022625
YGR020C	VMA7	chrVII	526973	527329	1	6260.9	0.224289	0.116932	1.91811	0.0550964	0.350547	0.0331888	6317.84	6583.91	6655.52	6631.67	6476.59	5389.28	5771.52	6519.09	6554.13	5580.4	Subunit F of the V1 peripheral membrane domain of V-ATPase; part of the electrogenic proton pump found throughout the endomembrane system; required for the V1 domain to assemble onto the vacuolar membrane; the V1 peripheral membrane domain of vacuolar H+-ATPase (V-ATPase) has eight subunits	GO:0000221,GO:0000329,GO:0007035,GO:0016021,GO:0046961
YIL127C	RRT14	chrIX	117024	117644	1	1034.53	0.272439	0.134159	2.03072	0.0422837	0.350547	0.0329881	1066.74	1015.21	1040.08	1184.33	1212.77	853.89	868.696	1040.67	1198.55	861.293	Putative protein of unknown function; identified in a screen for mutants with decreased levels of rDNA transcription; green fluorescent protein (GFP)-fusion protein localizes to the nucleolus; predicted to be involved in ribosome biogenesis	GO:0003674,GO:0005730,GO:0008150
YKL083W	YKL083W	chrXI	280921	281535	0	64.0512	0.711395	0.334376	2.12753	0.0333761	0.350547	0.0333761	70.9609	75.9185	70.6284	66.8272	75.5618	40.5478	47.9137	72.5026	71.1945	44.2308	Dubious open reading frame; unlikely to encode a functional protein, based on available experimental and comparative sequence data; not conserved in closely related Saccharomyces species; partially overlaps the verified essential gene RRP14	GO:0003674,GO:0008150,GO:0016021
YLR164W	SHH4	chrXII	493883	494389	0	176.504	-0.484904	0.227847	-2.1282	0.0333209	0.350547	0.0333209	160.534	149.414	187.697	123.445	150.179	244.48	219.778	165.882	136.812	232.129	Putative alternate subunit of succinate dehydrogenase (SDH); mitochondrial inner membrane protein; genetic interaction with SDH4 suggests that Shh4p can function as a functional SDH subunit; a fraction copurifies with SDH subunit Sdh3p; expression induced by nitrogen limitation in a GLN3, GAT1-dependent manner; Shh4p has greater similarity to human SDHD (subunit D of SDH, implicated in paragangli…	GO:0005739,GO:0005743,GO:0005749,GO:0006121,GO:0008177
YPL079W	RPL21B	chrXVI	406636	407539	0	23027	0.293762	0.145885	2.01365	0.0440464	0.350547	0.0334864	24978.2	25012.7	26583.4	18577	24393.2	20191.6	21452.8	25524.8	21485.1	20822.2	Ribosomal 60S subunit protein L21B; homologous to mammalian ribosomal protein L21, no bacterial homolog; RPL21B has a paralog, RPL21A, that arose from the whole genome duplication	GO:0002181,GO:0003735,GO:0022625
YPL123C	RNY1	chrXVI	317641	318945	1	934.386	-0.535449	0.238574	-2.24437	0.0248083	0.350547	0.0334178	806.162	751.916	952.999	678.481	923.743	1558.71	868.696	837.026	801.112	1213.7	Vacuolar RNase of the T(2) family; relocalizes to the cytosol where it cleaves tRNAs upon oxidative or stationary phase stress; promotes apoptosis under stress conditions and this function is independent of its catalytic activity	GO:0000324,GO:0000902,GO:0004521,GO:0005576,GO:0005773,GO:0005829,GO:0006401,GO:0006915
YPR133W-A	TOM5	chrXVI	797557	797709	0	3155.59	0.2522	0.125289	2.01294	0.0441205	0.350547	0.0335427	3058.3	3401.79	3163.76	3625.37	3452.23	2628.45	2759.2	3207.95	3538.8	2693.83	Component of the TOM (translocase of outer membrane) complex; responsible for recognition and initial import of all mitochondrially directed proteins; involved in transfer of precursors from the Tom70p and Tom20p receptors to the Tom40p pore	GO:0005739,GO:0005741,GO:0005742,GO:0006626,GO:0015266,GO:0016021,GO:0031307,GO:0070096
YHR103W	SBE22	chrVIII	320414	322972	0	2415.15	-0.316656	0.157605	-2.00917	0.0445194	0.353127	0.033846	2474.32	2176.6	2128.53	2556.14	1942.88	2837.16	2790.45	2259.82	2249.51	2813.8	Protein involved in bud growth; involved in the transport of cell wall components from the Golgi to the cell surface; similar in structure and functionally redundant with Sbe2p; SBE22 has a paralog, SBE2, that arose from the whole genome duplication	GO:0003674,GO:0005737,GO:0031505
YDR492W	IZH1	chrIV	1434924	1435874	0	1481.01	0.297023	0.132825	2.23621	0.0253382	0.354404	0.0341316	1487.85	1524.02	1552.86	1628.91	1695.42	1308.26	1169.72	1521.58	1662.17	1238.99	Membrane protein involved in zinc ion homeostasis; member of the four-protein IZH family; transcription is regulated directly by Zap1p, expression induced by zinc deficiency and fatty acids; deletion increases sensitivity to elevated zinc; IZH1 has a paralog, IZH4, that arose from the whole genome duplication	GO:0003674,GO:0005783,GO:0006882,GO:0016021
YGL077C	HNM1	chrVII	362225	363916	1	5688.77	-0.36664	0.172978	-2.11958	0.0340419	0.354404	0.0340419	5491.91	4950.85	5644.47	4426.37	5479.18	8057.09	5771.52	5362.41	4952.77	6914.3	Plasma membrane transporter for choline, ethanolamine, and carnitine; involved in the uptake of nitrogen mustard and the uptake of glycine betaine during hypersaline stress; co-regulated with phospholipid biosynthetic genes and negatively regulated by choline and myo-inositol	GO:0005886,GO:0015220,GO:0015871,GO:0016021,GO:0031460,GO:0034228,GO:0034229,GO:1900749,GO:1901235
YGR245C	SDA1	chrVII	979765	982068	1	2306.2	0.343739	0.170437	2.01681	0.0437153	0.354404	0.0341383	2402.2	2483.5	2033.71	3029.5	2560.6	1569.44	2064.45	2306.47	2795.05	1816.95	Protein required for actin organization and passage through Start; highly conserved nuclear protein; required for actin cytoskeleton organization; plays a critical role in G1 events; binds Nap1p; involved in 60S ribosome biogenesis	GO:0000055,GO:0003674,GO:0005634,GO:0007089,GO:0030036,GO:0042273
YAL026C	DRS2	chrI	95630	99697	1	1725.37	-0.381153	0.180034	-2.11711	0.0342502	0.354707	0.0342502	1671.65	1456.99	1614.78	1656.76	1558.46	2463.88	1655.11	1581.14	1607.61	2059.49	Trans-golgi network aminophospholipid translocase (flippase); maintains membrane lipid asymmetry in post-Golgi secretory vesicles; contributes to clathrin-coated vesicle formation, endocytosis, protein trafficking between the Golgi and endosomal system and the cellular response to mating pheromone; autoinhibited by its C-terminal tail; localizes to the trans-Golgi network; mutations in human homo…	GO:0000028,GO:0000749,GO:0004012,GO:0005802,GO:0006886,GO:0006892,GO:0006897,GO:0016021,GO:0032456,GO:0045332,GO:1990530
YBL007C	SLA1	chrII	212632	216366	1	4991.73	-0.324605	0.162244	-2.00072	0.0454227	0.354707	0.0345328	4896.3	4663.33	4254.15	5588.42	4007.61	5764.95	5767.35	4604.59	4798.02	5766.15	Cytoskeletal protein binding protein; required for assembly of the cortical actin cytoskeleton; interacts with proteins regulating actin dynamics and proteins required for endocytosis; found in the nucleus and cell cortex; has 3 SH3 domains	GO:0000147,GO:0005634,GO:0005938,GO:0006897,GO:0030041,GO:0030479,GO:0030674,GO:0031505,GO:0043130,GO:0043332
YBR047W	FMP23	chrII	331833	332360	0	218.899	0.47339	0.224759	2.10621	0.0351861	0.354707	0.0349785	226.842	238.255	252.521	241.32	229.519	140.725	203.112	239.206	235.42	171.919	Putative protein of unknown function; proposed to be involved in iron or copper homeostasis; the authentic, non-tagged protein is detected in highly purified mitochondria in high-throughput studies	GO:0003674,GO:0005739,GO:0008150
YBR257W	POP4	chrII	728885	729724	0	615.968	0.338007	0.168688	2.00373	0.0450985	0.354707	0.0351841	613.055	656.614	721.764	570.815	698.947	515.196	535.383	663.811	634.881	525.29	Subunit of both RNase MRP and nuclear RNase P; RNase MRP cleaves pre-rRNA, while nuclear RNase P cleaves tRNA precursors to generate mature 5' ends and facilitates turnover of nuclear RNAs; binds to the RPR1 RNA subunit in RNase P	GO:0000171,GO:0000172,GO:0003723,GO:0004526,GO:0005655,GO:0006364,GO:0006379,GO:0008033,GO:0030677,GO:0034965,GO:0042134
YDL022W	GPD1	chrIV	411825	413000	0	3623.46	-0.342638	0.162058	-2.11429	0.0344906	0.354707	0.0344906	3998.24	3488.21	3494.65	2592.34	2510.54	3912.87	5367.37	3660.37	2551.44	4640.12	NAD-dependent glycerol-3-phosphate dehydrogenase; key enzyme of glycerol synthesis, essential for growth under osmotic stress; expression regulated by high-osmolarity glycerol response pathway; protein abundance increases in response to DNA replication stress; constitutively inactivated via phosphorylation by the protein kinases YPK1 and YPK2, dephosphorylation increases catalytic activity; GPD1 …	GO:0004367,GO:0005634,GO:0005777,GO:0005829,GO:0006116,GO:0006973
YDL059C	RAD59	chrIV	344237	344953	1	235.907	-0.439672	0.208543	-2.1083	0.0350051	0.354707	0.0347985	207.066	201.103	218.658	213.476	243.687	318.42	248.943	208.942	228.581	283.681	Protein involved DNA double-strand break repair; repairs breaks in DNA during vegetative growth via recombination and single-strand annealing; anneals complementary single-stranded DNA; forms nuclear foci upon DNA replication stress; required for loading of Rad52p to DSBs; paralog of Rad52p	GO:0000722,GO:0000733,GO:0005515,GO:0005634,GO:0005737,GO:0006277,GO:0045002
YDR001C	NTH1	chrIV	450220	452475	1	3807.44	-0.287891	0.152125	-1.89247	0.0584283	0.354707	0.0351958	3894.7	3527.79	3352.43	3777.59	3332.28	3884.24	4883.03	3591.64	3554.93	4383.64	Neutral trehalase, degrades trehalose; required for thermotolerance and may mediate resistance to other cellular stresses; may be phosphorylated by Cdc28p; inhibited by Dcs1p; NTH1 has a paralog, NTH2, that arose from the whole genome duplication	GO:0004555,GO:0005737,GO:0005993
YER040W	GLN3	chrV	229795	231987	0	620.609	-0.443886	0.199486	-2.22514	0.0260716	0.354707	0.0351195	640.974	528.199	508.911	668.272	476.984	832.423	688.499	559.361	572.628	760.461	Transcriptional activator of genes regulated by nitrogen catabolite repression; localization and activity regulated by quality of nitrogen source and Ure2p	GO:0000978,GO:0001080,GO:0003700,GO:0005634,GO:0005829,GO:0043565,GO:0045944
YER158C	YER158C	chrV	488857	490578	1	1198.54	-0.361907	0.144964	-2.49653	0.0125414	0.354707	0.0344204	1041.15	1087.9	1140.7	1261.36	1056.92	1381.01	1420.74	1089.91	1159.14	1400.88	Protein of unknown function; potentially phosphorylated by Cdc28p; YER158C has a paralog, AFR1, that arose from the whole genome duplication	GO:0003674,GO:0005575,GO:0008150
YGL193C	YGL193C	chrVII	141916	142227	1	419.194	0.404135	0.197563	2.0456	0.0407956	0.354707	0.0348863	432.745	459.549	519.554	388.897	423.146	296.953	413.516	470.616	406.022	355.235	Haploid-specific gene repressed by a1-alpha2; turned off in sir3 null strains, absence enhances the sensitivity of rad52-327 cells to campothecin almost 100-fold	GO:0003674,GO:0005575,GO:0008150
YGR110W	CLD1	chrVII	713709	715046	0	377.041	-0.442077	0.198422	-2.22797	0.0258828	0.354707	0.0342829	433.908	308.52	353.142	274.734	278.634	533.085	457.263	365.19	276.684	495.174	Mitochondrial cardiolipin-specific phospholipase; functions upstream of Taz1p to generate monolyso-cardiolipin; transcription increases upon genotoxic stress; involved in restricting Ty1 transposition; has homology to mammalian CGI-58	GO:0004623,GO:0005739,GO:0005743,GO:0032048,GO:0035965
YKR094C	RPL40B	chrXI	617996	618750	1	16000	0.220836	0.123414	1.78938	0.0735529	0.354707	0.0348052	17059.7	16979.9	17003.1	14644.4	17113.8	14765.4	14433.5	17014.2	15879.1	14599.4	Ubiquitin-ribosomal 60S subunit protein L40B fusion protein; cleaved to yield ubiquitin and ribosomal protein L40B; ubiquitin may facilitate assembly of the ribosomal protein into ribosomes; homologous to mammalian ribosomal protein L40, no bacterial homolog; RPL40B has a paralog, RPL40A, that arose from the whole genome duplication	GO:0000027,GO:0000055,GO:0002181,GO:0003735,GO:0005739,GO:0016567,GO:0022625,GO:0031386,GO:0042254
YLR175W	CBF5	chrXII	506134	507585	0	10562	0.29838	0.148804	2.00519	0.0449431	0.354707	0.0350972	10859.3	11819.9	10907.7	11058	11082.1	7820.96	10385.8	11195.6	11070.1	9103.39	Pseudouridine synthase catalytic subunit of box H/ACA snoRNPs; acts on large and small rRNAs, on snRNA U2, and on some mRNAs; mutations in human ortholog dyskerin cause the disorder dyskeratosis congenita; small nucleolar ribonucleoprotein particles are also known as snoRNPs	GO:0000495,GO:0003729,GO:0005730,GO:0006364,GO:0009982,GO:0030686,GO:0031118,GO:0031120,GO:0031429,GO:1990481
YLR340W	RPP0	chrXII	805887	806825	0	29785.4	0.305315	0.153261	1.99212	0.0463583	0.354707	0.0352441	31842.8	31746.8	33314.3	28825.7	30489.2	22007.9	30271	32301.3	29657.5	26139.5	Conserved ribosomal protein P0 of the ribosomal stalk; involved in interaction between translational elongation factors and the ribosome; phosphorylated on serine 302; homologous to mammalian ribosomal protein LP0 and bacterial L10	GO:0000027,GO:0002181,GO:0003735,GO:0005737,GO:0022625,GO:0030686,GO:0030687,GO:0070180
YLR343W	GAS2	chrXII	816094	817761	0	476.586	0.321691	0.160138	2.00883	0.044555	0.354707	0.0347601	469.97	495.085	503.106	522.551	561.991	387.59	395.809	489.387	542.271	391.699	1,3-beta-glucanosyltransferase; involved with Gas4p in spore wall assembly; has similarity to Gas1p	GO:0005737,GO:0016021,GO:0030476,GO:0042124
YLR420W	URA4	chrXII	963785	964879	0	6099.51	0.282671	0.14052	2.0116	0.0442618	0.354707	0.0345651	6496.99	6422.38	6507.49	6472.03	6152.62	4680.89	5964.21	6475.62	6312.32	5322.55	Dihydroorotase; catalyzes the third enzymatic step in the de novo biosynthesis of pyrimidines, converting carbamoyl-L-aspartate into dihydroorotate	GO:0004151,GO:0005634,GO:0005737,GO:0006207,GO:0006221
YNL303W	YNL303W	chrXIV	61510	61857	0	129.241	0.622234	0.280605	2.21747	0.0265908	0.354707	0.0352208	124.472	162.336	181.892	96.5281	136.011	101.37	102.077	156.234	116.27	101.723	Dubious open reading frame; unlikely to encode a functional protein, based on available experimental and comparative sequence data	GO:0003674,GO:0005575,GO:0008150
YOR375C	GDH1	chrXV	1041678	1043042	1	8985.56	-0.277607	0.138031	-2.01119	0.0443059	0.354707	0.0345995	9216.77	8811.39	8629.24	7403.89	7297.38	9543.05	11997.2	8885.8	7350.64	10770.1	NADP(+)-dependent glutamate dehydrogenase; synthesizes glutamate from ammonia and alpha-ketoglutarate; rate of alpha-ketoglutarate utilization differs from Gdh3p; expression regulated by nitrogen and carbon sources; GDH1 has a paralog, GDH3, that arose from the whole genome duplication	GO:0004354,GO:0005634,GO:0005737,GO:0006537,GO:0019676
YPL206C	PGC1	chrXVI	162632	163597	1	2514.06	-0.272375	0.128976	-2.11182	0.0347015	0.354707	0.0347015	2545.28	2460.89	2260.11	2163.53	2318.8	2856.24	2993.56	2422.09	2241.17	2924.9	Phosphatidyl Glycerol phospholipase C; regulates the phosphatidylglycerol (PG) content via a phospholipase C-type degradation mechanism; contains glycerophosphodiester phosphodiesterase motifs	GO:0005739,GO:0005811,GO:0034478,GO:0034479,GO:0046475
YMR162C	DNF3	chrXIII	578951	583921	1	1485.73	-0.382611	0.153883	-2.48638	0.012905	0.355643	0.0354181	1392.46	1290.61	1353.55	1486.9	1367.67	1972.53	1536.36	1345.54	1427.29	1754.45	Trans-golgi network aminophospholipid translocase (flippase); type 4 P-type ATPase; involved in phospholipid translocation, contributing to the maintenance of membrane lipid asymmetry in post-Golgi secretory vesicles; role in protein trafficking between the Golgi and endosomal system; localizes to the trans-Golgi network; localizes to the shmoo tip where it has a redundant role in the cellular re…	GO:0000749,GO:0004012,GO:0005802,GO:0006886,GO:0016021,GO:0030140,GO:0045332,GO:0070867
YNL195C	YNL195C	chrXIV	271523	272308	1	136.582	0.598541	0.277022	2.16062	0.0307246	0.355643	0.0354507	129.126	146.183	170.282	126.229	187.96	94.2141	102.077	148.53	157.095	98.1455	Protein of unknown function; shares a promoter with YNL194C; the authentic, non-tagged protein is detected in highly purified mitochondria in high-throughput studies; YNL195C has a paralog, HBT1, that arose from the whole genome duplication	GO:0003674,GO:0005739,GO:0008150
YDL149W	ATG9	chrIV	184925	187918	0	488.106	-0.441878	0.210184	-2.10234	0.0355234	0.355802	0.0355234	510.686	415.936	435.38	443.658	377.809	740.594	492.678	454.001	410.734	616.636	Transmembrane protein involved in forming Cvt and autophagic vesicles; cycles between the phagophore assembly site (PAS) and other cytosolic punctate structures, not found in autophagosomes; may be involved in membrane delivery to the PAS	GO:0000045,GO:0000407,GO:0000422,GO:0003674,GO:0005739,GO:0016021,GO:0030659,GO:0032258,GO:0034497,GO:0034727,GO:0044805,GO:0051260
YBL101C	ECM21	chrII	24946	28299	1	1384.12	-0.340576	0.144629	-2.35483	0.0185311	0.356011	0.0356919	1409.91	1221.16	1325.49	1273.43	1121.15	1590.91	1746.77	1318.85	1197.29	1668.84	Protein involved in regulating endocytosis of plasma membrane proteins; identified as a substrate for ubiquitination by Rsp5p and deubiquitination by Ubp2p; promoter contains several Gcn4p binding elements; ECM21 has a paralog, CSR2, that arose from the whole genome duplication	GO:0005737,GO:0031625,GO:0070086
YBR005W	RCR1	chrII	245906	246547	0	3722.83	-0.330328	0.16619	-1.98766	0.0468498	0.356011	0.0356177	3849.34	3140.12	4537.63	2404.85	2467.09	5018.39	4642.42	3842.36	2435.97	4830.4	Protein of the ER membrane involved in cell wall chitin deposition; may function in the endosomal-vacuolar trafficking pathway, helping determine whether plasma membrane proteins are degraded or routed to the plasma membrane; RCR1 has a paralog, RCR2, that arose from the whole genome duplication	GO:0003674,GO:0016192,GO:0030176,GO:0031505
YPR117W	YPR117W	chrXVI	760025	767494	0	1854.11	-0.325455	0.133758	-2.43316	0.0149676	0.356011	0.0357148	1677.47	1694.44	1797.64	1743.08	1746.42	2313.61	2006.13	1723.18	1744.75	2159.87	Putative protein of unknown function	GO:0003674,GO:0005575,GO:0008150
YBL086C	YBL086C	chrII	61202	62602	1	635.347	0.362459	0.157503	2.30128	0.0213758	0.356142	0.0358336	638.648	647.73	610.5	837.196	730.116	468.685	514.551	632.293	783.656	491.618	Protein of unknown function; green fluorescent protein (GFP)-fusion protein localizes to the cell periphery	GO:0003674,GO:0005575,GO:0008150
YHR157W	REC104	chrVIII	412907	413455	0	69.8082	0.793807	0.390195	2.03438	0.0419129	0.356142	0.0358417	57.0013	89.6484	96.7512	53.833	97.2858	52.4737	41.6641	81.1336	75.5594	47.0689	Protein involved in early stages of meiotic recombination; required for meiotic crossing over; forms a complex with Rec102p and Spo11p necessary during the initiation of recombination	GO:0000794,GO:0003674,GO:0007131,GO:0042138
YBR169C	SSE2	chrII	573915	575996	1	2004.31	-0.381142	0.156832	-2.43025	0.0150884	0.357177	0.036003	1840.33	1804.27	1742.49	2057.72	1909.83	1997.58	2677.96	1795.7	1983.77	2337.77	Member of the heat shock protein 70 (HSP70) family; may be involved in protein folding; localized to the cytoplasm; SSE2 has a paralog, SSE1, that arose from the whole genome duplication	GO:0000774,GO:0005737,GO:0006457,GO:0042026
RDN18-1		chrXII	455933	457732	1	102.682	-2.89021	1.31007	-2.20616	0.0273727	0.358382	0.0362565	18.6127	20.9987	26.1228	297.938	30.2247	23.8517	301.023	21.9114	164.081	162.437	18S ribosomal RNA (18S rRNA); component of the small (40S) ribosomal subunit; involved in codon recognition by tRNAs or the release factor eRF1 (Sup45p); encoded in the rDNA repeat (RDN1) as part of the 35S primary transcript	GO:0001731,GO:0002181,GO:0003735,GO:0022627
YJL184W	GON7	chrX	83448	83819	0	1116.35	0.350984	0.144544	2.42822	0.0151731	0.358382	0.0362052	1098.15	1202.58	1231.64	1238.16	1197.65	859.853	986.397	1177.46	1217.91	923.125	Component of the EKC/KEOPS protein complex; EKC/KEOPS complex is required for t6A tRNA modification and telomeric TG1-3 recombination; may have role in transcription; implicated in osmotic stress response; other complex members are Kae1p, Cgi121p, Pcc1p, and Bud32p	GO:0000032,GO:0000408,GO:0000722,GO:0000723,GO:0000790,GO:0031490,GO:0045944
YMR095C	SNO1	chrXIII	457285	457959	1	158.42	-0.551952	0.263638	-2.09359	0.0362962	0.358382	0.0362962	169.841	128.415	114.166	170.781	123.732	213.472	188.53	137.474	147.257	201.001	Protein of unconfirmed function; involved in pyridoxine metabolism; expression is induced during stationary phase; forms a putative glutamine amidotransferase complex with Snz1p, with Sno1p serving as the glutaminase	GO:0004359,GO:0005737,GO:0008615,GO:0009228,GO:0043066,GO:1903600
YGL076C	RPL7A	chrVII	364335	365996	1	39124.5	0.278139	0.148276	1.87582	0.0606793	0.359327	0.0365518	43478.1	43833.2	41700.7	33460.9	40472.8	31427	39498.6	43004	36966.9	35462.8	Ribosomal 60S subunit protein L7A; required for processing of 27SA3 pre-rRNA to 27SB pre-rRNA during assembly of large ribosomal subunit; depletion leads to a turnover of pre-rRNA; contains a conserved C-terminal Nucleic acid Binding Domain (NDB2); binds to Domain II of 25S and 5.8S rRNAs; homologous to mammalian ribosomal protein L7 and bacterial L30; RPL7A has a paralog, RPL7B, that arose from …	GO:0000470,GO:0002181,GO:0003735,GO:0005737,GO:0022625,GO:0030687,GO:0042273
YHR005C-A	TIM10	chrVIII	115620	115901	1	6160.76	0.255195	0.121999	2.09179	0.0364575	0.359327	0.0364575	6082.86	6293.16	6584.89	6692.93	6878.96	5565.79	5026.77	6320.3	6785.94	5296.28	Essential protein of the mitochondrial intermembrane space; forms a complex with Tim9p (TIM10 complex) that delivers hydrophobic proteins to the TIM22 complex for insertion into the inner membrane	GO:0005739,GO:0008565,GO:0016021,GO:0042719,GO:0045039,GO:0051082
YJL110C	GZF3	chrX	209922	211577	1	949.828	-0.283664	0.137422	-2.06418	0.0390006	0.359327	0.0365641	910.858	874.677	930.747	897.526	831.18	1100.75	1103.06	905.427	864.353	1101.91	GATA zinc finger protein; negatively regulates nitrogen catabolic gene expression by competing with Gat1p for GATA site binding; function requires a repressive carbon source; dimerizes with Dal80p and binds to Tor1p; GZF3 has a paralog, DAL80, that arose from the whole genome duplication	GO:0000122,GO:0000981,GO:0005634,GO:0043565,GO:0051457,GO:0090295
YMR260C	TIF11	chrXIII	789378	789839	1	8512.43	0.249124	0.119251	2.08908	0.0367008	0.360105	0.0367008	8600.22	8899.42	8784.04	9340.95	9219.49	6952.76	7790.14	8761.23	9280.22	7371.45	Translation initiation factor eIF1A; essential protein that forms a complex with Sui1p (eIF1) and the 40S ribosomal subunit and scans for the start codon; C-terminus associates with Fun12p (eIF5B); N terminus interacts with eIF2 and eIF3	GO:0001731,GO:0001732,GO:0003725,GO:0003743,GO:0016282,GO:0031369,GO:0033290,GO:0043024
YIR027C	DAL1	chrIX	406260	407642	1	175.74	-0.561689	0.255458	-2.19875	0.0278955	0.361407	0.0369489	182.637	157.49	135.452	140.151	146.401	282.642	185.405	158.526	143.276	234.024	Allantoinase; converts allantoin to allantoate in the first step of allantoin degradation; expression sensitive to nitrogen catabolite repression	GO:0004038,GO:0005575,GO:0009442
YJL194W	CDC6	chrX	69338	70879	0	463.335	0.370945	0.183439	2.02217	0.0431589	0.361407	0.0369072	503.706	508.815	459.568	485.425	527.988	325.575	432.265	490.696	506.707	378.92	Essential ATP-binding protein required for DNA replication; component of the pre-replicative complex (pre-RC) which requires ORC to associate with chromatin and is in turn required for Mcm2-7p DNA association; homologous to S. pombe Cdc18p; relocalizes from nucleus to cytoplasm upon DNA replication stress	GO:0000082,GO:0003682,GO:0003688,GO:0003924,GO:0005515,GO:0005524,GO:0005525,GO:0005634,GO:0005656,GO:0005737,GO:0006267,GO:0016887,GO:0030174,GO:0031261,GO:0031938
YKR046C	PET10	chrXI	524223	525074	1	2570.84	-0.255474	0.129623	-1.9709	0.0487349	0.361839	0.0370509	2544.12	2559.42	2378.14	2193.23	2366.03	3135.3	2819.62	2493.9	2279.63	2977.46	Protein of unknown function that localizes to lipid particles; localization suggests a role in lipid metabolism; expression pattern suggests a role in respiratory growth; computational analysis of large-scale protein-protein interaction data suggests a role in ATP/ADP exchange	GO:0003674,GO:0005811,GO:0009060
YLR099W-A	YLR099W-A	chrXII	341325	341588	0	2360.74	-0.277236	0.157588	-1.75925	0.0785356	0.362369	0.0371631	2520.86	2267.86	2817.4	1297.56	1476.29	3371.43	2773.79	2535.37	1386.93	3072.61	Mitochondrial protein required for outer membrane protein import; involved in import of the subset of proteins with multiple alpha-helical transmembrane segments, including Ugo1p, Tom20p, and Fzo1p; component of a large protein complex in the outer membrane that includes Mim1p; not essential in W303 strain background	GO:0003674,GO:0031307,GO:0045040,GO:0070096
YLR133W	CKI1	chrXII	408445	410193	0	1460.77	-0.35649	0.147439	-2.41788	0.0156113	0.36266	0.0372509	1401.77	1305.96	1295.5	1555.59	1250.55	1707.78	1708.23	1334.41	1403.07	1708	Choline kinase; catalyzes the first step in phosphatidylcholine synthesis via the CDP-choline (Kennedy pathway); exhibits some ethanolamine kinase activity contributing to phosphatidylethanolamine synthesis via the CDP-ethanolamine pathway; CKI1 has a paralog, EKI1, that arose from the whole genome duplication	GO:0004103,GO:0004305,GO:0005737,GO:0006646,GO:0006656
YDR087C	RRP1	chrIV	617470	618306	1	1530.73	0.326277	0.139611	2.33704	0.0194371	0.363341	0.0374369	1615.81	1582.98	1590.59	1712.45	1668.03	1156.81	1388.46	1596.46	1690.24	1272.63	Essential evolutionarily conserved nucleolar protein; necessary for biogenesis of 60S ribosomal subunits and for processing of pre-rRNAs to mature rRNA; associated with several distinct 66S pre-ribosomal particles	GO:0003674,GO:0005634,GO:0005730,GO:0006364,GO:0030687
YOL097W-A	YOL097W-A	chrXV	136220	136405	0	53.3673	0.966374	0.464338	2.08119	0.0374166	0.363341	0.0374166	59.3279	63.8038	77.401	26.9165	77.4509	40.5478	28.1232	66.8442	52.1837	34.3355	Putative protein of unknown function; identified by expression profiling and mass spectrometry	GO:0003674,GO:0005575,GO:0008150
YAL062W	GDH3	chrI	31567	32940	0	829.632	-0.345799	0.166363	-2.07858	0.0376564	0.363509	0.0376564	823.611	659.037	835.931	722.105	804.733	934.985	1027.02	772.86	763.419	981.002	NADP(+)-dependent glutamate dehydrogenase; synthesizes glutamate from ammonia and alpha-ketoglutarate; rate of alpha-ketoglutarate utilization differs from Gdh1p; expression regulated by nitrogen and carbon sources; GDH3 has a paralog, GDH1, that arose from the whole genome duplication	GO:0004354,GO:0005634,GO:0005739,GO:0006537,GO:0019676
YBR293W	VBA2	chrII	787006	788430	0	752.532	-0.351011	0.170934	-2.05349	0.0400254	0.363509	0.0375248	711.935	726.071	709.186	683.122	610.162	1047.09	780.16	715.731	646.642	913.624	Permease of basic amino acids in the vacuolar membrane	GO:0000329,GO:0015174,GO:0015802,GO:0016021,GO:0055085
YCL010C	SGF29	chrIII	103571	104350	1	745.468	-0.414859	0.181785	-2.28214	0.0224811	0.363509	0.0376865	806.162	736.571	565.995	620.936	614.884	994.615	879.112	702.909	617.91	936.863	Component of the HAT/Core module of the SAGA, SLIK, and ADA complexes; HAT/Core module also contains Gcn5p, Ngg1p, and Ada2p; binds methylated histone H3K4; involved in transcriptional regulation through SAGA and TBP recruitment to target promoters and H3 acetylation	GO:0000124,GO:0001135,GO:0005671,GO:0034613,GO:0034629,GO:0035064,GO:0043970,GO:0043971,GO:0044154,GO:0045944,GO:0070868
YIR023W	DAL81	chrIX	399777	402689	0	911.895	-0.453908	0.198831	-2.28289	0.0224371	0.363509	0.0376127	874.796	817.335	713.056	1084.09	698.002	1137.72	1058.27	801.729	891.044	1098	Positive regulator of genes in multiple nitrogen degradation pathways; contains DNA binding domain but does not appear to bind the dodecanucleotide sequence present in the promoter region of many genes involved in allantoin catabolism	GO:0001080,GO:0001128,GO:0001135,GO:0001190,GO:0005634,GO:1901714,GO:1901717
YLR344W	RPL26A	chrXII	819312	820142	0	15189.8	0.252605	0.135705	1.86143	0.0626832	0.363647	0.0377589	15790.5	16429.1	17271.1	13048.9	16094.7	13636	14058.5	16496.9	14571.8	13847.2	Ribosomal 60S subunit protein L26A; binds to 5.8S rRNA; non-essential even when paralog is also deleted; deletion has minimal affections on ribosome biosynthesis; homologous to mammalian ribosomal protein L26 and bacterial L24; RPL26A has a paralog, RPL26B, that arose from the whole genome duplication	GO:0002181,GO:0003723,GO:0003735,GO:0022625
YHL048W	COS8	chrVIII	6401	7546	0	2263.84	-0.511558	0.212113	-2.41172	0.0158773	0.36399	0.0378856	1798.45	1690.4	2378.14	2010.38	2392.48	3400.06	2176.95	1955.66	2201.43	2788.5	Nuclear membrane protein; member of the DUP380 subfamily of conserved, often subtelomerically-encoded proteins; regulation suggests a potential role in the unfolded protein response	GO:0003674,GO:0005635,GO:0008150,GO:0016021
YPL006W	NCR1	chrXVI	544631	548143	0	2358.55	-0.358963	0.193027	-1.85965	0.0629354	0.36399	0.0379108	2136.97	1961.77	2601.64	1792.27	2287.63	3338.04	2391.52	2233.46	2039.95	2864.78	Vacuolar membrane protein; transits through the biosynthetic vacuolar protein sorting pathway, involved in sphingolipid metabolism; cells lacking Ncr1p exhibit high levels of long chain bases (LCB), similar to the accumulation of high amounts of lipids observed in patients with Neimann-Pick C, a disease caused by loss-of-function mutations in NPC1, the functional ortholog of Ncr1p	GO:0000329,GO:0006665,GO:0016021,GO:0046624
YDR234W	LYS4	chrIV	931129	933210	0	8495.77	0.283102	0.136573	2.07289	0.0381821	0.36436	0.0381821	8565.33	9043.99	7988.75	10161.4	9687.03	6357.66	7666.19	8532.69	9924.23	7011.93	Homoaconitase; catalyzes the conversion of homocitrate to homoisocitrate, which is a step in the lysine biosynthesis pathway	GO:0004409,GO:0005739,GO:0019878
YIR019C	FLO11	chrIX	389572	393675	1	335.209	-0.513139	0.240749	-2.13142	0.0330542	0.36436	0.0381387	326.885	271.368	261.228	400.963	270.134	331.538	484.345	286.494	335.548	407.942	GPI-anchored cell surface glycoprotein (flocculin); required for pseudohyphal formation, invasive growth, flocculation, and biofilms; transcriptionally regulated by the MAPK pathway (via Ste12p and Tec1p) and the cAMP pathway (via Flo8p); required for formation of fibrous interconnections between cells in a colony of a wild S. cerevisiae strain; a portion is cleaved and shed from cells, and free …	GO:0000128,GO:0001403,GO:0003674,GO:0005576,GO:0005886,GO:0005935,GO:0007124,GO:0016337,GO:0030447,GO:0043709,GO:0044011,GO:0090606
YKL029C	MAE1	chrXI	382716	384725	1	2559.33	0.348239	0.176714	1.97064	0.0487654	0.36436	0.0380821	2839.6	2876.02	2183.67	3182.64	2697.56	1823.46	2312.36	2633.1	2940.1	2067.91	Mitochondrial malic enzyme; catalyzes the oxidative decarboxylation of malate to pyruvate, which is a key intermediate in sugar metabolism and a precursor for synthesis of several amino acids	GO:0004470,GO:0005739,GO:0006090,GO:0006520
YOR075W	UFE1	chrXV	468212	469252	0	752.612	0.321171	0.156811	2.04814	0.0405465	0.36436	0.0380134	785.223	835.911	765.302	783.363	823.624	698.854	576.006	795.478	803.493	637.43	t-SNARE protein required for retrograde vesicular traffic; involved in Sey1p-independent homotypic ER fusion; required for efficient nuclear fusion during mating; forms a complex with the SNAREs Sec22p, Sec20p and Use1p to mediate fusion of Golgi-derived vesicles at the ER	GO:0005484,GO:0005783,GO:0006890,GO:0016021,GO:0016320,GO:0031201,GO:0048279
YDR542W	PAU10	chrIV	1523249	1523611	0	6.0517	2.81939	1.36174	2.07042	0.0384126	0.365896	0.0384126	6.97976	6.46114	10.6426	9.28155	6.61166	2.38517	0	8.02785	7.94661	1.19258	Protein of unknown function; member of the seripauperin multigene family encoded mainly in subtelomeric regions	GO:0003674,GO:0005575,GO:0008150
YER056C-A	RPL34A	chrV	269423	270185	1	17081.6	0.236689	0.135824	1.74262	0.0813999	0.365896	0.0385185	17436.6	18298	19132.6	15832.5	17828.8	14158.3	16884.4	18289	16830.6	15521.4	Ribosomal 60S subunit protein L34A; homologous to mammalian ribosomal protein L34, no bacterial homolog; RPL34A has a paralog, RPL34B, that arose from the whole genome duplication	GO:0002181,GO:0003735,GO:0030687,GO:0042254
YJL042W	MHP1	chrX	361249	365445	0	3034.65	-0.229967	0.13193	-1.74309	0.0813171	0.365896	0.0384793	3064.11	2905.9	2860.93	2836.44	2670.17	3712.51	3192.51	2943.65	2753.3	3452.51	Microtubule-associated protein involved in microtubule organization; involved in assembly and stabilization of microtubules; overproduction results in cell cycle arrest at G2 phase; similar to Drosophila protein MAP and to mammalian MAP4 proteins	GO:0005200,GO:0005874,GO:0007026,GO:0031505
YLL020C	YLL020C	chrXII	105556	105861	1	170.147	0.507918	0.245915	2.06542	0.038883	0.366101	0.0386536	180.31	209.987	208.983	126.229	184.182	140.725	140.616	199.76	155.206	140.671	Dubious open reading frame; unlikely to encode a functional protein, based on available experimental and comparative sequence data; partially overlaps the verified gene KNS1	GO:0003674,GO:0005575,GO:0008150
YOL016C	CMK2	chrXV	294777	296120	1	10385.8	-0.41707	0.201696	-2.06782	0.038657	0.366101	0.038657	10985	7842.21	12659.9	7238.68	5949.55	12374.2	15651.1	10495.7	6594.12	14012.7	Calmodulin-dependent protein kinase; may play a role in stress response, many CA++/calmodulan dependent phosphorylation substrates demonstrated in vitro, amino acid sequence similar to mammalian Cam Kinase II; CMK2 has a paralog, CMK1, that arose from the whole genome duplication	GO:0004672,GO:0004683,GO:0005737,GO:0006468,GO:0007165
YDR160W	SSY1	chrIV	776163	778721	0	1078.49	-0.367248	0.18715	-1.96232	0.0497248	0.366837	0.0387933	1045.8	975.633	1108.77	735.099	991.749	1545.59	1146.8	1043.4	863.424	1346.2	Component of the SPS plasma membrane amino acid sensor system; senses external amino acid concentration and transmits intracellular signals that result in regulation of expression of amino acid permease genes; other members are Ssy1p, Ptr3p, and Ssy5p	GO:0003674,GO:0005886,GO:0016021,GO:0043200
YDL174C	DLD1	chrIV	145826	147589	1	2956.25	-0.283353	0.144743	-1.95764	0.0502725	0.368458	0.0392591	3030.38	2631.3	2969.29	2748.27	2314.08	3305.84	3694.56	2876.99	2531.17	3500.2	D-lactate dehydrogenase; oxidizes D-lactate to pyruvate, transcription is heme-dependent, repressed by glucose, and derepressed in ethanol or lactate; located in the mitochondrial inner membrane	GO:0004458,GO:0005739,GO:0005743,GO:0009060,GO:0044262
YDR150W	NUM1	chrIV	755628	763874	0	2833.18	-0.307375	0.166595	-1.84504	0.0650322	0.368458	0.0391739	2618.57	2527.92	2679.04	3019.29	2530.38	3744.71	2712.33	2608.51	2774.83	3228.52	Protein required for nuclear migration; component of the mitochondria-ER-cortex-ancor (MECA); required for the association of mitochondria with the cell cortex and for accurate distribution of mitochondrial network; interacts with Mdm36p to link the ER and motochondria at the cortex; localizes to the mother cell cortex and the bud tip; may mediate interactions of dynein and cytoplasmic microtubul…	GO:0000001,GO:0000226,GO:0000266,GO:0005739,GO:0005783,GO:0005934,GO:0005938,GO:0015631,GO:0030473,GO:0051646
YHR052W-A	YHR052W-A	chrVIII	212510	212704	0	291.413	0.493016	0.226597	2.17574	0.029575	0.368458	0.0391734	243.128	325.48	319.279	308.148	422.202	220.628	201.029	295.962	365.175	210.829	Dubious open reading frame; unlikely to encode a functional protein, based on available experimental and comparative sequence data; partially overlaps CUP1-1	GO:0003674,GO:0005575,GO:0008150
YLR258W	GSY2	chrXII	660716	662833	0	3346.23	-0.247567	0.13425	-1.84408	0.0651718	0.368458	0.039258	3114.13	2975.36	2780.63	4020.77	3513.62	3363.09	3656.02	2956.71	3767.2	3509.55	Glycogen synthase; expression induced by glucose limitation, nitrogen starvation, heat shock, and stationary phase; activity regulated by cAMP-dependent, Snf1p and Pho85p kinases as well as by the Gac1p-Glc7p phosphatase; GSY2 has a paralog, GSY1, that arose from the whole genome duplication; relocalizes from cytoplasm to plasma membrane upon DNA replication stress	GO:0004373,GO:0005634,GO:0005737,GO:0005978
YMR131C	RRB1	chrXIII	533163	534698	1	4649.89	0.23668	0.128264	1.84526	0.0649999	0.368458	0.0391544	4481	4821.63	4841.43	4907.16	5495.23	3827	4175.78	4714.69	5201.2	4001.39	Nuclear protein involved in early steps of ribosome biogenesis; physically interacts with the ribosomal protein Rpl3p; essential gene	GO:0003674,GO:0005730,GO:0042254
YKL122C	SRP21	chrXI	212495	212998	1	2742.84	0.277297	0.134696	2.05868	0.0395246	0.370396	0.0395246	2667.43	2799.29	3090.23	2941.32	2993.19	2487.73	2220.69	2852.32	2967.26	2354.21	Subunit of the signal recognition particle (SRP); SRP functions in protein targeting to the endoplasmic reticulum membrane; not found in mammalian SRP; forms a pre-SRP structure in the nucleolus that is translocated to the cytoplasm	GO:0005048,GO:0005634,GO:0005786,GO:0006617,GO:0045047
YJR109C	CPA2	chrX	629585	632941	1	6100.03	0.278684	0.151451	1.84009	0.0657552	0.370635	0.0396094	6645.89	6688.9	5746.05	6850.71	6283.91	4615.3	5869.43	6360.28	6567.31	5242.36	Large subunit of carbamoyl phosphate synthetase; carbamoyl phosphate synthetase catalyzes a step in the synthesis of citrulline, an arginine precursor	GO:0004088,GO:0005951,GO:0006526
YFL017W-A	SMX2	chrVI	103699	103932	0	941.362	0.379002	0.186694	2.03007	0.0423491	0.370959	0.0397033	960.88	1046.71	1095.22	762.015	1133.43	820.497	770.785	1034.27	947.721	795.641	Core Sm protein Sm G; part of heteroheptameric complex (with Smb1p, Smd1p, Smd2p, Smd3p, Sme1p, and Smx3p) that is part of the spliceosomal U1, U2, U4, and U5 snRNPs; homolog of human Sm G	GO:0000398,GO:0003674,GO:0005682,GO:0005685,GO:0046540,GO:0071004
YBL105C	PKC1	chrII	14241	17696	1	2699.4	-0.25137	0.12895	-1.94936	0.0512524	0.372845	0.0400243	2665.1	2554.58	2419.75	2746.41	2448.2	3057.78	3003.98	2546.48	2597.31	3030.88	Protein serine/threonine kinase; essential for cell wall remodeling during growth; localized to sites of polarized growth and the mother-daughter bud neck; homolog of the alpha, beta, and gamma isoforms of mammalian protein kinase C (PKC)	GO:0004697,GO:0005634,GO:0005737,GO:0005856,GO:0005886,GO:0006468,GO:0007015,GO:0007165,GO:0030242,GO:0030427,GO:0032165,GO:0033962,GO:0035556,GO:0060211,GO:0060237
YNL065W	AQR1	chrXIV	503724	505484	0	3253.34	0.238755	0.130061	1.83571	0.0664001	0.372845	0.0399979	3584.11	3615.01	3631.07	2670.3	3153.76	3082.83	3036.27	3610.06	2912.03	3059.55	Plasma membrane transporter of the major facilitator superfamily; member of the 12-spanner drug:H(+) antiporter DHA1 family; confers resistance to short-chain monocarboxylic acids and quinidine; involved in the excretion of excess amino acids; AQR1 has a paralog, QDR1, that arose from the whole genome duplication; relocalizes from plasma membrane to cytoplasm upon DNA replication stress	GO:0005737,GO:0005886,GO:0006855,GO:0008028,GO:0015238,GO:0015718,GO:0016021,GO:0032973
YJL218W	YJL218W	chrX	21973	22563	0	362.205	-0.371398	0.181287	-2.04868	0.0404935	0.376097	0.0404935	351.314	339.21	364.752	262.668	306.97	494.922	415.599	351.759	284.819	455.261	Putative acetyltransferase; similar to bacterial galactoside O-acetyltransferases; induced by oleate in an OAF1/PIP2-dependent manner; promoter contains an oleate response element consensus sequence; non-essential gene	GO:0005575,GO:0008150,GO:0016407
YJR035W	RAD26	chrX	497355	500612	0	614.162	-0.333376	0.171483	-1.94407	0.051887	0.376097	0.0404802	571.177	528.199	601.793	652.493	516.654	754.905	673.916	567.056	584.574	714.411	Protein involved in transcription-coupled nucleotide excision repair; repairs UV-induced DNA lesions; recruitment to DNA lesions is dependent on an elongating RNA polymerase II; homolog of human CSB protein	GO:0001208,GO:0005634,GO:0005737,GO:0006283,GO:0006289,GO:0008094
YGR040W	KSS1	chrVII	575398	576504	0	945.652	-0.356708	0.158299	-2.25339	0.0242348	0.376771	0.0406263	814.305	877.1	833.995	1084.09	853.849	1037.55	1118.68	841.8	968.967	1078.11	Mitogen-activated protein kinase (MAPK); involved in signal transduction pathways that control filamentous growth and pheromone response; the KSS1 gene is nonfunctional in S288C strains and functional in W303 strains	GO:0000750,GO:0001402,GO:0001403,GO:0004672,GO:0004707,GO:0005634,GO:0006468,GO:0008134,GO:0043433
YAL034W-A	MTW1	chrI	79718	80587	0	284.93	0.408733	0.194179	2.10493	0.0352974	0.376938	0.0407269	269.884	322.25	270.903	350.843	346.64	211.087	222.903	287.679	348.741	216.995	Essential component of the MIND kinetochore complex; joins kinetochore subunits contacting DNA to those contacting microtubules; critical to kinetochore assembly; complex consists of Mtw1p Including Nnf1p-Nsl1p-Dsn1p (MIND)	GO:0000818,GO:0000922,GO:0003674,GO:0007059,GO:0034501
YKL175W	ZRT3	chrXI	118793	120304	0	3078.15	-0.346153	0.189447	-1.82718	0.0676732	0.376938	0.0407648	2881.48	2785.56	3166.67	2421.56	2804.29	4578.33	2909.19	2944.57	2612.92	3743.76	Vacuolar membrane zinc transporter; transports zinc from storage in the vacuole to the cytoplasm when needed; transcription is induced under conditions of zinc deficiency	GO:0000329,GO:0005385,GO:0006829,GO:0006882,GO:0016021
YDR074W	TPS2	chrIV	593893	596583	0	2909.15	-0.339258	0.166329	-2.03968	0.0413821	0.379136	0.0413821	3057.13	2583.65	2501.99	3015.58	2340.53	3150.81	3714.35	2714.26	2678.05	3432.58	Phosphatase subunit of the trehalose-6-P synthase/phosphatase complex; involved in synthesis of the storage carbohydrate trehalose; expression is induced by stress conditions and repressed by the Ras-cAMP pathway; protein abundance increases in response to DNA replication stress	GO:0004805,GO:0005739,GO:0005946,GO:0005992,GO:0034605
YIL017C	VID28	chrIX	318200	320965	1	975.86	-0.305915	0.151996	-2.01264	0.0441521	0.379136	0.0413937	909.695	922.328	1005.25	773.153	881.24	1258.18	1081.18	945.756	827.197	1169.68	GID Complex subunit, serves as adaptor for regulatory subunit Vid24p; protein involved in proteasome-dependent catabolite degradation of fructose-1,6-bisphosphatase (FBPase); localized to the nucleus and the cytoplasm	GO:0003674,GO:0005634,GO:0005737,GO:0007039,GO:0030437,GO:0034657,GO:0043161,GO:0045721,GO:0045944
YIL048W	NEO1	chrIX	261437	264892	0	1663.22	-0.370152	0.171363	-2.16005	0.030769	0.379136	0.041447	1549.51	1528.06	1627.36	1312.41	1569.8	2356.54	1698.85	1568.31	1441.1	2027.7	Putative aminophospholipid translocase (flippase); involved in endocytosis, vacuolar biogenesis and Golgi to ER vesicle-mediated transport; localizes to endosomes and the Golgi apparatus	GO:0000139,GO:0004012,GO:0005768,GO:0005794,GO:0006890,GO:0006897,GO:0007033,GO:0015662,GO:0016021,GO:0030137
YJR104C	SOD1	chrX	622550	623014	1	18666	0.261919	0.143953	1.81948	0.0688376	0.379136	0.0414661	18950	19917.3	19498.3	18540.8	21306.5	14334.9	18114.5	19455.2	19923.7	16224.7	Cytosolic copper-zinc superoxide dismutase; detoxifies superoxide; stabilizes Yck1p and Yck2p kinases in glucose to repress respiration; phosphorylated by Dun1p and enters the nucleus under oxidative stress to promote transcription of stress response genes; human ortholog implicated in ALS; abundance increases under DNA replication stress and during exposure to boric acid; localization of a fract…	GO:0001320,GO:0004784,GO:0005634,GO:0005739,GO:0005758,GO:0005829,GO:0006801,GO:0006878,GO:0006882,GO:0031505,GO:0036091,GO:0050821,GO:0051091,GO:1901856
YLL038C	ENT4	chrXII	65775	66518	1	427.407	-0.45487	0.216871	-2.09742	0.0359561	0.379136	0.0414869	462.991	418.359	307.669	395.394	321.138	599.869	486.428	396.34	358.266	543.149	Protein of unknown function; contains an N-terminal epsin-like domain; proposed to be involved in the trafficking of Arn1p in the absence of ferrichrome	GO:0000147,GO:0006897,GO:0007015,GO:0030276,GO:0030479,GO:0090002
YOL080C	REX4	chrXV	180558	181427	1	547.12	0.343904	0.159059	2.16212	0.030609	0.379136	0.0412314	610.729	604.925	542.774	555.965	592.216	447.219	476.012	586.143	574.09	461.615	Putative RNA exonuclease; possibly involved in pre-rRNA processing and ribosome assembly	GO:0000027,GO:0005634,GO:0005730,GO:0006364,GO:0008408
YPL072W	UBP16	chrXVI	418512	420011	0	414.244	0.342725	0.168144	2.03828	0.0415216	0.379136	0.0412767	419.949	407.052	428.608	510.485	474.15	313.649	345.812	418.536	492.318	329.731	Deubiquitinating enzyme anchored to the outer mitochondrial membrane; probably not important for general mitochondrial functioning, but may perform a more specialized function at mitochondria	GO:0004843,GO:0005741,GO:0016579
YPR168W	NUT2	chrXVI	878076	878549	0	169.465	-0.561175	0.275429	-2.03746	0.0416043	0.379136	0.0413589	180.31	135.684	130.614	180.062	120.899	256.405	182.28	148.87	150.481	219.343	Subunit of the RNA polymerase II mediator complex; associates with core polymerase subunits to form the RNA polymerase II holoenzyme; required for transcriptional activation and has a role in basal transcription; protein abundance increases in response to DNA replication stress	GO:0000122,GO:0003674,GO:0045944,GO:0070847
YER125W	RSP5	chrV	410189	412618	0	3813.95	-0.263461	0.137551	-1.91537	0.0554457	0.382985	0.0421528	3877.25	3770.89	3264.39	3741.39	3311.5	4405.4	4326.81	3637.51	3526.45	4366.11	E3 ubiquitin ligase of NEDD4 family; regulates many cellular processes including MVB sorting, heat shock response, transcription, endocytosis, ribosome stability; mutant tolerates aneuploidy; autoubiquitinates; ubiquitinates Sec23p and Sna3p; deubiquitinated by Ubp2p; activity regulated by SUMO ligase Siz1p, in turn regulates Siz1p SUMO ligase activity; required for efficient Golgi-to-ER traffick…	GO:0000151,GO:0000209,GO:0004842,GO:0005634,GO:0005737,GO:0005739,GO:0005794,GO:0005886,GO:0005934,GO:0006333,GO:0006513,GO:0006808,GO:0007005,GO:0010008,GO:0010793,GO:0010794,GO:0010795,GO:0010796,GO:0016567,GO:0019220,GO:0031234,GO:0031384,GO:0032436,GO:0032443,GO:0032511,GO:0032880,GO:0032956,GO:0034517,GO:0034644,GO:0035091,GO:0042493,GO:0042787,GO:0043130,GO:0043161,GO:0043162,GO:0045723,GO:…
YGL180W	ATG1	chrVII	160065	162758	0	424.054	-0.385801	0.184463	-2.09148	0.0364851	0.382985	0.0420973	415.296	369.093	400.55	426.951	324.916	537.855	493.719	394.979	375.934	515.787	Protein serine/threonine kinase; required for vesicle formation in autophagy and the cytoplasm-to-vacuole targeting (Cvt) pathway; structurally required for phagophore assembly site formation; during autophagy forms a complex with Atg13p and Atg17p; essential for cell cycle progression from G2/M to G1 under nitrogen starvation	GO:0000045,GO:0000407,GO:0000421,GO:0000422,GO:0004672,GO:0004674,GO:0005829,GO:0006468,GO:0006914,GO:0032258,GO:0034273,GO:0034727,GO:0044805,GO:0046777
YIR006C	PAN1	chrIX	365466	369908	1	4238.79	-0.26867	0.139378	-1.92764	0.0538998	0.382985	0.0420917	4310	3944.53	3952.29	4176.7	3486.23	4634.38	5167.39	4068.94	3831.47	4900.88	Part of actin cytoskeleton-regulatory complex Pan1p-Sla1p-End3p; associates with actin patches on cell cortex; promotes protein-protein interactions essential for endocytosis; binds to and activates Arp2/3 complex in vitro; phosphorylation of Thr-1225 is regulated by MAPK Hog1p in response to osmotic stress; previously thought to be a subunit of poly(A) ribonuclease	GO:0000147,GO:0005634,GO:0005737,GO:0005886,GO:0006897,GO:0007120,GO:0007121,GO:0030479,GO:0030674,GO:0043332
YJL200C	ACO2	chrX	56444	58813	1	12004.6	0.262797	0.137121	1.91653	0.0552974	0.382985	0.0420401	12387.9	12768.8	11170.9	14270.4	13249.8	9207.94	10976.4	12109.2	13760.1	10092.2	Putative mitochondrial aconitase isozyme; similarity to Aco1p, an aconitase required for the TCA cycle; expression induced during growth on glucose, by amino acid starvation via Gcn4p, and repressed on ethanol	GO:0003994,GO:0005739,GO:0008150
YBR066C	NRG2	chrII	370037	370699	1	1143.78	0.437299	0.180515	2.42251	0.0154136	0.383793	0.042303	1193.54	1186.43	1445.46	1116.57	1179.71	1098.37	786.409	1275.14	1148.14	942.389	Transcriptional repressor; mediates glucose repression and negatively regulates filamentous growth; activated in stochastic pulses of nuclear localization in response to low glucose	GO:0000433,GO:0005634,GO:0007124,GO:0043565,GO:0043709,GO:1900460,GO:1900464,GO:2000218
YDL006W	PTC1	chrIV	439909	440754	0	982.37	0.355194	0.174983	2.02987	0.0423695	0.383839	0.0423695	953.9	1011.17	1104.9	939.293	1267.55	747.75	852.03	1023.32	1103.42	799.89	Type 2C protein phosphatase (PP2C); dephosphorylates Hog1p, inactivating osmosensing MAPK cascade; involved in Fus3p activation during pheromone response; deletion affects precursor tRNA splicing, mitochondrial inheritance, and sporulation	GO:0000001,GO:0000173,GO:0000750,GO:0004722,GO:0005634,GO:0005737,GO:0006388,GO:0006470
YGR215W	RSM27	chrVII	922175	922507	0	1237.74	0.278477	0.137378	2.02708	0.0426539	0.384876	0.0426539	1190.05	1284.15	1263.57	1370.89	1500.85	992.229	1062.43	1245.92	1435.87	1027.33	Mitochondrial ribosomal protein of the small subunit	GO:0003735,GO:0005739,GO:0005763,GO:0032543
YMR021C	MAC1	chrXIII	317165	318418	1	681.987	-0.357021	0.178423	-2.00098	0.0453943	0.384876	0.0425583	679.363	623.5	604.695	705.398	533.655	742.979	884.32	635.853	619.527	813.65	Copper-sensing transcription factor; involved in regulation of genes required for high affinity copper transport; required for regulation of yeast copper genes in response to DNA-damaging agents; undergoes changes in redox state in response to changing levels of copper or MMS	GO:0001077,GO:0001159,GO:0005634,GO:0006878,GO:0045732,GO:0045944
YNR065C	YNR065C	chrXIV	750350	753700	1	1024.39	-0.312648	0.162726	-1.92132	0.0546917	0.384876	0.0426683	966.696	999.055	886.241	1072.02	884.073	1293.95	1068.68	950.664	978.046	1181.32	Protein of unknown function; protein-protein interactions suggest a possible role in actin patch formation; YNR065C is not an essential gene	GO:0003674,GO:0008150,GO:0016021
YER106W	MAM1	chrV	372326	373234	0	18.9093	-1.30607	0.626314	-2.08532	0.0370401	0.384946	0.0427377	11.6329	11.307	5.80507	32.4854	23.6131	29.8146	17.7072	9.58167	28.0493	23.7609	Monopolin; kinetochore associated protein involved in chromosome attachment to meiotic spindle	GO:0000778,GO:0003674,GO:0010789,GO:0033551,GO:0045132
YBR181C	RPS6B	chrII	591712	592774	1	31018.4	0.251189	0.148738	1.6888	0.0912573	0.387286	0.043183	33281.8	34939.4	33832	25557.7	32354.6	25939.9	31223.1	34017.7	28956.2	28581.5	Protein component of the small (40S) ribosomal subunit; homologous to mammalian ribosomal protein S6, no bacterial homolog; RPS6B has a paralog, RPS6A, that arose from the whole genome duplication	GO:0000462,GO:0002181,GO:0003735,GO:0005737,GO:0022627,GO:0032040
YDR510C-A	YDR510C-A	chrIV	1469695	1469811	1	583.366	0.458781	0.214009	2.14374	0.0320534	0.387286	0.0431772	571.177	745.455	694.674	440.874	655.499	435.293	540.591	670.435	548.186	487.942	Dubious open reading frame unlikely to encode a functional protein; identified by gene-trapping, microarray-based expression analysis, and genome-wide homology searching	GO:0003674,GO:0005575,GO:0008150
YGR027C	RPS25A	chrVII	534132	534785	1	46658.2	0.365107	0.19165	1.90508	0.0567701	0.387286	0.0431597	44878.7	48019.2	60724.9	38572.3	54894.7	44144.7	35372.8	51207.6	46733.5	39758.7	Protein component of the small (40S) ribosomal subunit; homologous to mammalian ribosomal protein S25, no bacterial homolog; RPS25A has a paralog, RPS25B, that arose from the whole genome duplication	GO:0002181,GO:0003735,GO:0022627
YDL133W	SRF1	chrIV	222427	223740	0	1042.82	-0.263619	0.132238	-1.99352	0.0462049	0.387943	0.0433183	992.289	1025.71	1042.01	894.742	895.408	1231.94	1217.63	1020	895.075	1224.79	Regulator of phospholipase D (Spo14p); interacts with Spo14p and regulates its catalytic activity; capable of buffering the toxicity of C16:0 platelet activating factor, a lipid that accumulates intraneuronally in Alzheimer's patients	GO:0003674,GO:0016021,GO:0043085
YKL073W	LHS1	chrXI	296430	299075	0	2894.73	-0.481841	0.238782	-2.01791	0.0436002	0.389911	0.0436002	2494.1	2375.28	3239.23	2124.55	2479.37	4969.49	2581.09	2702.87	2301.96	3775.29	Molecular chaperone of the endoplasmic reticulum lumen; involved in polypeptide translocation and folding; nucleotide exchange factor for the ER lumenal Hsp70 chaperone Kar2p; regulated by the unfolded protein response pathway	GO:0000774,GO:0005524,GO:0005788,GO:0006986,GO:0031204,GO:0051082
YBL087C	RPL23A	chrII	59822	60739	1	16723.3	0.286536	0.150215	1.90751	0.0564552	0.390517	0.0440873	17165.5	18603.3	19042.6	13929.8	18363.4	14326.5	15632.4	18270.5	16146.6	14979.4	Ribosomal 60S subunit protein L23A; homologous to mammalian ribosomal protein L23 and bacterial L14; RPL23A has a paralog, RPL23B, that arose from the whole genome duplication	GO:0002181,GO:0003735,GO:0022625
YBR041W	FAT1	chrII	318266	320275	0	2841.22	-0.393651	0.195426	-2.01432	0.0439756	0.390517	0.0439756	2512.71	2578	2787.4	2472.61	2636.16	4311.19	2590.46	2626.04	2554.38	3450.83	Very long chain fatty acyl-CoA synthetase and fatty acid transporter; activates imported fatty acids with a preference for very long lengths (C20-C26); has a separate function in the transport of long chain fatty acids	GO:0000038,GO:0005324,GO:0005777,GO:0005783,GO:0005811,GO:0015909,GO:0016021,GO:0031235,GO:0031957
YCL030C	HIS4	chrIII	65934	68333	1	8974.27	0.265687	0.148136	1.79354	0.0728872	0.390517	0.0439055	9920.56	9579.45	9115.9	9295.47	9041.92	6827.54	9039.02	9538.64	9168.7	7933.28	Multifunctional enzyme containing phosphoribosyl-ATP pyrophosphatase; phosphoribosyl-AMP cyclohydrolase, and histidinol dehydrogenase activities; catalyzes the second, third, ninth and tenth steps in histidine biosynthesis	GO:0000105,GO:0004399,GO:0004635,GO:0004636,GO:0005737
YDR400W	URH1	chrIV	1271063	1272085	0	1206.41	-0.327118	0.138859	-2.35576	0.0184851	0.390517	0.044108	1177.25	1099.2	1103.93	1140.7	1098.48	1320.19	1505.11	1126.8	1119.59	1412.65	Uridine nucleosidase (uridine-cytidine N-ribohydrolase); cleaves N-glycosidic bonds in nucleosides; involved in the pyrimidine salvage and nicotinamide riboside salvage pathways	GO:0005634,GO:0005737,GO:0006216,GO:0006218,GO:0008655,GO:0019358,GO:0034356,GO:0045437,GO:0046135,GO:0050263,GO:0070635,GO:0070636
YIL107C	PFK26	chrIX	163278	165761	1	767.037	-0.383125	0.172326	-2.22326	0.0261982	0.390517	0.0439177	696.812	652.576	663.713	908.664	697.058	950.489	799.95	671.034	802.861	875.22	6-phosphofructo-2-kinase; inhibited by phosphoenolpyruvate and sn-glycerol 3-phosphate; has negligible fructose-2,6-bisphosphatase activity; transcriptional regulation involves protein kinase A	GO:0003873,GO:0005737,GO:0006003
YLR186W	EMG1	chrXII	523632	524390	0	3158.4	0.295343	0.1648	1.79213	0.0731123	0.390517	0.0440411	3100.18	3340.41	3715.25	2748.27	3686.47	2919.44	2598.8	3385.28	3217.37	2759.12	Methyltransferase for rRNA; catalyzes methylation of the pseudouridine residue 1191 of 18S rRNA; member of the SPOUT methyltransferase family; required for maturation of 18S rRNA and for 40S ribosomal subunit production independently of methyltransferase activity; forms homodimers; human ortholog is mutated in Bowen-Conradi syndrome, and the equivalent mutation in yeast affects Emg1p dimerization…	GO:0000447,GO:0000472,GO:0000480,GO:0005634,GO:0005730,GO:0005737,GO:0005880,GO:0006364,GO:0030686,GO:0032040,GO:0042274,GO:0070037,GO:0070475
YNL306W	MRPS18	chrXIV	58155	58808	0	1911.04	0.28699	0.142433	2.0149	0.0439147	0.390517	0.0439147	2007.84	2009.42	2013.39	2098.56	1954.22	1475.23	1818.64	2010.22	2026.39	1646.93	Mitochondrial ribosomal protein of the small subunit; essential for viability, unlike most other mitoribosomal proteins	GO:0003735,GO:0005739,GO:0005763,GO:0032543
YPR116W	RRG8	chrXVI	758648	759481	0	55.4978	-0.785397	0.403585	-1.94605	0.0516485	0.390517	0.0441671	46.5317	29.8828	47.4081	59.4019	63.283	93.0215	48.9553	41.2742	61.3425	70.9884	Putative protein of unknown function; required for mitochondrial genome maintenance; null mutation results in a decrease in plasma membrane electron transport	GO:0000002,GO:0003674,GO:0005739
YIL020C-A	YIL020C-A	chrIX	313713	314051	1	322.316	0.633352	0.314931	2.01108	0.0443169	0.390738	0.0443169	304.783	343.248	530.197	190.272	380.643	302.916	204.154	392.743	285.457	253.535	Dubious open reading frame; unlikely to encode a functional protein, based on available experimental and comparative sequence data; completely overlaps origin of replication ARS918, partially overlaps ORF RPB3/YIL021W	GO:0003674,GO:0005575,GO:0008150
YMR119W	ASI1	chrXIII	505333	507207	0	1356.88	-0.397188	0.18618	-2.13336	0.0328954	0.390738	0.0443113	1295.91	1186.43	1288.73	1223.31	1191.99	2011.89	1299.92	1257.02	1207.65	1655.9	Subunit of the nuclear inner membrane Asi ubiquitin ligase complex; Asi complex targets both misfolded proteins and regulators of sterol biosynthesis for ubiquitin-mediated degradation; acts with Asi2p and Asi3p to ensure the fidelity of SPS-sensor signalling by targeting latent unprocessed forms of Stp1p and Stp2p and maintains the repressed state of gene expression in the absence of inducing am…	GO:0004842,GO:0005637,GO:0006511,GO:0016021,GO:0036369,GO:0071230,GO:0097658
YBR029C	CDS1	chrII	296369	297742	1	3277.81	-0.320214	0.191193	-1.67482	0.0939699	0.391506	0.0444666	3033.87	2984.24	3146.35	2845.72	3304.89	4713.09	2916.48	3054.82	3075.3	3814.79	Phosphatidate cytidylyltransferase (CDP-diglyceride synthetase); an enzyme that catalyzes that conversion of CTP + phosphate into diphosphate + CDP-diaclglyerol, a critical step in the synthesis of all major yeast phospholipids	GO:0004605,GO:0005783,GO:0006658,GO:0016021,GO:0016024,GO:0046488,GO:0070319
YHR173C	YHR173C	chrVIII	450815	451153	1	178.714	0.530863	0.273493	1.94104	0.0522528	0.392867	0.0446839	146.575	180.912	213.82	234.823	223.852	156.228	94.7858	180.436	229.338	125.507	Protein of unknown function; expressed at both mRNA and protein levels	GO:0003674,GO:0005575,GO:0008150
YBR149W	ARA1	chrII	539987	541021	0	6730.53	-0.23569	0.141153	-1.66975	0.0949685	0.394557	0.0449391	6922.76	6164.74	6269.48	6439.54	6125.23	6789.38	8402.6	6452.32	6282.39	7595.99	NADP+ dependent arabinose dehydrogenase; involved in carbohydrate metabolism; purified as homodimer; naturally occurs with a N-terminus degradation product	GO:0005829,GO:0044262,GO:0045290
YBR152W	SPP381	chrII	546376	547251	0	203.846	-0.475127	0.245497	-1.93537	0.0529452	0.396936	0.045276	210.556	165.567	158.672	232.967	164.347	271.909	222.903	178.265	198.657	247.406	mRNA splicing factor, component of U4/U6.U5 tri-snRNP; interacts genetically and physically with Prp38p; relocalizes to the cytosol in response to hypoxia	GO:0000349,GO:0000398,GO:0003674,GO:0005634,GO:0005829,GO:0046540
YHR189W	PTH1	chrVIII	484028	484600	0	203.986	-0.431041	0.215457	-2.00059	0.0454364	0.396936	0.0454364	221.026	177.681	197.372	148.505	148.29	293.376	241.652	198.693	148.397	267.514	One of two mitochondrially-localized peptidyl-tRNA hydrolases; dispensable for respiratory growth on rich medium, but required for respiratory growth on minimal medium; see also PTH2	GO:0004045,GO:0005739,GO:0032543
YJL190C	RPS22A	chrX	74910	75302	1	32655.5	0.233927	0.140547	1.66441	0.0960301	0.396936	0.0454414	34018.2	34106.8	37109.9	28600.2	35097.5	31713.2	27943.1	35078.3	31848.8	29828.1	Protein component of the small (40S) ribosomal subunit; homologous to mammalian ribosomal protein S15A and bacterial S8; RPS22A has a paralog, RPS22B, that arose from the whole genome duplication	GO:0002181,GO:0003735,GO:0022627
YPL237W	SUI3	chrXVI	100496	101353	0	4394.5	0.30639	0.184109	1.66418	0.0960773	0.396936	0.0454638	4428.66	4719.06	5370.66	3335.79	5079.64	4089.37	3738.31	4839.46	4207.72	3913.84	Beta subunit of the translation initiation factor eIF2; involved in the identification of the start codon; proposed to be involved in mRNA binding	GO:0001731,GO:0003729,GO:0003743,GO:0005850,GO:0016282,GO:0031369,GO:0043614
YDR093W	DNF2	chrIV	631282	636120	0	3346.12	-0.261597	0.138341	-1.89095	0.0586304	0.396971	0.0457859	3381.69	2977.78	3372.75	2983.09	2929.91	4212.2	3565.4	3244.07	2956.5	3888.8	Aminophospholipid translocase (flippase); type 4 P-type ATPase; involved in phospholipid translocation, contributing to endocytosis, protein transport, and cellular polarization; localizes primarily to the plasma membrane; localizes to the shmoo tip where it has a redundant role in the cellular response to mating pheromone; DNF2 has a paralog, DNF1, that arose from the whole genome duplication	GO:0000749,GO:0004012,GO:0005886,GO:0006886,GO:0006897,GO:0007163,GO:0016021,GO:0045332,GO:0070867
YDR453C	TSA2	chrIV	1365072	1365662	1	295.53	-0.372751	0.186544	-1.99819	0.0456959	0.396971	0.0456959	253.598	246.331	292.189	287.728	305.081	349.427	334.354	264.039	296.404	341.891	Stress inducible cytoplasmic thioredoxin peroxidase; cooperates with Tsa1p in the removal of reactive oxygen, nitrogen and sulfur species using thioredoxin as hydrogen donor; deletion enhances the mutator phenotype of tsa1 mutants; protein abundance increases in response to DNA replication stress; TSA2 has a paralog, TSA1, that arose from the whole genome duplication	GO:0005737,GO:0008379,GO:0034599,GO:0045454,GO:0051920
YJL148W	RPA34	chrX	140437	141138	0	2684.73	0.233662	0.124189	1.8815	0.0599033	0.396971	0.0455417	2824.47	2738.72	2646.15	3079.62	2849.63	2374.43	2280.07	2736.45	2964.62	2327.25	RNA polymerase I subunit A34.5; essential for nucleolar assembly and for high polymerase loading rate; nucleolar localization depends on Rpa49p	GO:0001054,GO:0005634,GO:0005730,GO:0005736,GO:0006360,GO:0006362,GO:0042790
YNL016W	PUB1	chrXIV	602907	604268	0	4151.76	-0.319184	0.179954	-1.7737	0.0761122	0.396971	0.0458482	4184.36	3975.22	3216.98	4798.56	3425.78	4455.49	5005.94	3792.19	4112.17	4730.71	Poly (A)+ RNA-binding protein; abundant mRNP-component protein that binds mRNA and is required for stability of many mRNAs; component of glucose deprivation induced stress granules, involved in P-body-dependent granule assembly; protein abundance increases in response to DNA replication stress	GO:0000184,GO:0000932,GO:0003729,GO:0005634,GO:0005737,GO:0008266,GO:0010494,GO:0034063,GO:0043488
YPL186C	UIP4	chrXVI	194512	195426	1	247.737	-0.424398	0.206354	-2.05665	0.03972	0.396971	0.0458298	225.679	193.027	221.56	271.021	250.299	318.42	254.151	213.422	260.66	286.285	Protein that interacts with Ulp1p; a Ubl (ubiquitin-like protein)-specific protease for Smt3p protein conjugates; detected in a phosphorylated state in the mitochondrial outer membrane; also detected in ER and nuclear envelope	GO:0003674,GO:0005635,GO:0005741,GO:0005783,GO:0008150
YPR118W	MRI1	chrXVI	767752	768987	0	2983.51	0.263018	0.14814	1.77547	0.0758211	0.396971	0.0456728	3026.89	3108.62	3548.83	2606.26	3213.27	2729.82	2650.88	3228.11	2909.76	2690.35	5'-methylthioribose-1-phosphate isomerase; catalyzes the isomerization of 5-methylthioribose-1-phosphate to 5-methylthioribulose-1-phosphate in the methionine salvage pathway	GO:0005634,GO:0005737,GO:0019509,GO:0046523
YGR148C	RPL24B	chrVII	787312	788178	1	22951	0.212005	0.119587	1.77281	0.0762609	0.397197	0.0459378	22947.1	23144.6	25428.2	24069.9	23904	19855.3	21308	23840	23986.9	20581.7	Ribosomal 60S subunit protein L24B; not essential for translation but may be required for normal translation rate; homologous to mammalian ribosomal protein L24, no bacterial homolog; RPL24B has a paralog, RPL24A, that arose from the whole genome duplication	GO:0002181,GO:0003723,GO:0003735,GO:0022625
YOL129W	VPS68	chrXV	77560	78114	0	6530.4	-0.39071	0.235656	-1.65797	0.0973242	0.397651	0.0460538	5715.26	5525.89	7876.52	3946.52	5938.21	10333.7	6376.69	6372.56	4942.37	8355.21	Vacuolar membrane protein of unknown function; involved in vacuolar protein sorting; also detected in the mitochondria	GO:0000329,GO:0003674,GO:0005739,GO:0006623,GO:0016021,GO:0032511,GO:0034424
YBR280C	SAF1	chrII	762784	764697	1	552.618	-0.353706	0.160528	-2.20339	0.0275673	0.398307	0.0462127	535.115	515.276	541.807	471.503	447.704	738.209	618.711	530.733	459.603	678.46	F-Box protein involved in proteasome-dependent degradation of Aah1p; involved in proteasome-dependent degradation of Aah1p during entry of cells into quiescence; interacts with Skp1	GO:0004842,GO:0019005,GO:0031146
YNL248C	RPA49	chrXIV	181361	182608	1	2854.75	0.232863	0.140631	1.65584	0.0977537	0.398307	0.0462571	2815.17	3128.81	2702.26	3324.65	3107.48	2262.33	2642.54	2882.08	3216.07	2452.44	RNA polymerase I subunit A49; essential for nucleolar assembly and for high polymerase loading rate; required for nucleolar localization of Rpa34p	GO:0001054,GO:0005730,GO:0005736,GO:0006360,GO:0006362,GO:0008361,GO:0042790
YDR463W	STP1	chrIV	1386816	1388375	0	1608.71	-0.393596	0.174537	-2.25509	0.0241277	0.398506	0.0464711	1566.96	1393.99	1468.68	1653.04	1298.72	2218.21	1661.35	1476.54	1475.88	1939.78	Transcription factor; contains a N-terminal regulatory motif (RI) that acts as a cytoplasmic retention determinant and as an Asi dependent degron in the nucleus; undergoes proteolytic processing by SPS (Ssy1p-Ptr3p-Ssy5p)-sensor component Ssy5p in response to extracellular amino acids; activates transcription of amino acid permease genes and may have a role in tRNA processing; STP1 has a paralog,…	GO:0000978,GO:0001077,GO:0005634,GO:0005737,GO:0005886,GO:0045893,GO:0045944
YIL090W	ICE2	chrIX	193595	195070	0	1448.08	-0.44606	0.197771	-2.25544	0.0241056	0.398506	0.0464287	1313.36	1346.34	1289.69	1224.24	1374.28	2232.52	1356.17	1316.46	1299.26	1794.34	Integral ER membrane protein with type-III transmembrane domains; required for maintenance of ER zinc homeostasis; necessary for efficient targeting of Trm1p tRNA methyltransferase to inner nuclear membrane; mutations cause defects in cortical ER morphology in both the mother and daughter cells	GO:0000921,GO:0003674,GO:0005783,GO:0006882,GO:0016021,GO:0030176,GO:0032541,GO:0036228,GO:0048309,GO:0097038
YJL070C	YJL070C	chrX	307971	310637	1	563.51	-0.364454	0.165528	-2.20177	0.0276815	0.398506	0.0464042	544.421	542.736	487.626	542.043	476.984	623.721	727.038	524.928	509.513	675.38	Putative metallo-dependent hydrolase superfamily protein; similar to AMP deaminases but lacks key catalytic residues and does not rescue purine nucleotide metabolic defect of quadruple aah1 ade8 amd1 his1 mutant; may regulate purine nucleotide homeostasis as overexpression in an AMD1 strain grown in adenine results in greatly reduced GDP and GTP intracellular levels; not an essential gene; YJL070…	GO:0003674,GO:0003876,GO:0005737,GO:0005739,GO:0008150
YLR379W	YLR379W	chrXII	876922	877296	0	490.458	-0.501897	0.22808	-2.20053	0.0277692	0.398647	0.0465512	536.278	432.897	389.907	392.61	398.589	795.453	487.47	453.027	395.599	641.461	Dubious open reading frame; unlikely to encode a functional protein, based on available experimental and comparative sequence data; partially overlaps the essential ORF SEC61/YLR378C	GO:0003674,GO:0005575,GO:0008150
YMR055C	BUB2	chrXIII	386101	387021	1	346.487	0.466083	0.22132	2.10593	0.0352108	0.398848	0.0466384	337.355	402.206	331.857	449.227	388.199	205.124	311.439	357.139	418.713	258.282	Mitotic exit network regulator; forms GTPase-activating Bfa1p-Bub2p complex that binds Tem1p and spindle pole bodies, blocks cell cycle progression before anaphase in response to spindle and kinetochore damage	GO:0005096,GO:0005816,GO:0007096,GO:0031578
YLR247C	IRC20	chrXII	628684	633354	1	2012.29	-0.303534	0.134725	-2.25299	0.0242598	0.399049	0.0467257	2022.97	1990.84	1941.8	1733.79	1496.12	2556.9	2343.6	1985.2	1614.96	2450.25	E3 ubiquitin ligase and putative helicase; involved in synthesis-dependent strand annealing-mediated homologous recombination; ensures precise end-joining along with Srs2p in the Yku70p/Yku80p/Lig4p-dependent nonhomologous end joining (NHEJ) pathway; localizes to both the mitochondrion and the nucleus; contains a Snf2/Swi2 family ATPase/helicase and a RING finger domain; interacts with Cdc48p and…	GO:0004386,GO:0004842,GO:0005634,GO:0005739,GO:0006303,GO:0045003
YML106W	URA5	chrXIII	56773	57453	0	6069.58	0.297784	0.159363	1.86859	0.0616796	0.399925	0.0468921	6227.11	6461.95	6256.9	6810.8	6456.76	4263.49	6010.04	6315.32	6633.78	5136.76	Major orotate phosphoribosyltransferase (OPRTase) isozyme; catalyzes the fifth enzymatic step in de novo biosynthesis of pyrimidines, converting orotate into orotidine-5'-phosphate; URA5 has a paralog, URA10, that arose from the whole genome duplication	GO:0004588,GO:0005634,GO:0005737,GO:0006207,GO:0046132
YBL039C	URA7	chrII	143989	145728	1	4406.02	0.254905	0.155086	1.64364	0.10025	0.400221	0.0474383	4828.83	4920.16	4070.32	4894.16	4409.03	3433.45	4286.19	4606.44	4651.6	3859.82	Major CTP synthase isozyme (see also URA8); catalyzes the ATP-dependent transfer of the amide nitrogen from glutamine to UTP, forming CTP, the final step in de novo biosynthesis of pyrimidines; involved in phospholipid biosynthesis; capable of forming cytoplasmic filaments termed cytoophidium, especially during conditions of glucose depletion; URA7 has a paralog, URA8, that arose from the whole g…	GO:0003883,GO:0005737,GO:0006241,GO:0008654,GO:0019856,GO:0097268
YDL195W	SEC31	chrIV	107208	111029	0	5112.09	-0.283113	0.17185	-1.64745	0.0994661	0.400221	0.0470674	5180.14	4732.79	4186.43	5864.08	4385.42	5150.77	6285.03	4699.79	5124.75	5717.9	Component of the Sec13p-Sec31p complex of the COPII vesicle coat; COPII coat is required for vesicle formation in ER to Golgi transport; mutant has increased aneuploidy tolerance	GO:0005198,GO:0030127,GO:0043332,GO:0090114
YFL034C-A	RPL22B	chrVI	64243	64932	1	4236.28	0.217049	0.123391	1.75904	0.0785711	0.400221	0.0473294	4327.45	4444.46	4674.05	4056.04	4439.26	3954.61	3758.1	4481.99	4247.65	3856.35	Ribosomal 60S subunit protein L22B; homologous to mammalian ribosomal protein L22, no bacterial homolog; RPL22B has a paralog, RPL22A, that arose from the whole genome duplication	GO:0002181,GO:0003735,GO:0022625
YGR159C	NSR1	chrVII	806412	807656	1	6112.37	0.304392	0.153247	1.98628	0.0470019	0.400221	0.0470019	6453.95	6587.14	6076.94	6366.22	6982.86	4412.56	5906.92	6372.68	6674.54	5159.74	Nucleolar protein that binds nuclear localization sequences; required for pre-rRNA processing and ribosome biogenesis	GO:0000028,GO:0003697,GO:0003723,GO:0003729,GO:0005634,GO:0005730,GO:0005739,GO:0006364
YIR031C	DAL7	chrIX	413015	414679	1	587.088	-0.297212	0.151929	-1.95626	0.0504345	0.400221	0.0472836	582.81	534.66	560.19	521.623	536.489	715.55	658.292	559.22	529.056	686.921	Malate synthase; can accept butyryl-CoA as acyl-CoA donor in addition to traditional substrate acetyl-CoA; recycles glyoxylate generated during allantoin degradation; expression sensitive to nitrogen catabolite repression and induced by allophanate, an intermediate in allantoin degradation	GO:0000256,GO:0004474,GO:0005575
YLR293C	GSP1	chrXII	720771	721430	1	14782.9	0.241375	0.146744	1.64487	0.0999956	0.400221	0.047318	15617.2	15843.5	15369.9	14850.5	15390.1	11322.4	15086.6	15610.2	15120.3	13204.5	Ran GTPase; GTP binding protein (mammalian Ranp homolog) involved in the maintenance of nuclear organization, RNA processing and transport; regulated by Srm1p, Rna1p, Yrb1p, Yrb2p, Yrp4p, Yrb30p, Cse1p and Kap95p; GSP1 has a paralog, GSP2, that arose from the whole genome duplication	GO:0000467,GO:0003924,GO:0005634,GO:0005737,GO:0006913,GO:0006997,GO:0016021,GO:0031938
YML075C	HMG1	chrXIII	115734	118898	1	2473.38	-0.349575	0.198588	-1.7603	0.0783567	0.400221	0.0472003	2446.4	2092.6	2681.94	1775.56	2182.79	3713.7	2420.68	2406.98	1979.18	3067.19	HMG-CoA reductase; catalyzes the conversion of HMG-CoA to mevalonate, which is a rate-limiting step in sterol biosynthesis; one of two isozymes; localizes to the nuclear envelope; overproduction induces the formation of karmellae; forms foci at the nuclear periphery upon DNA replication stress; HMG1 has a paralog, HMG2, that arose from the whole genome duplication	GO:0004420,GO:0005635,GO:0005789,GO:0006696,GO:0016021,GO:0019287,GO:0034399
YNL198C	YNL198C	chrXIV	266514	266816	1	29.1109	-1.04242	0.496565	-2.09927	0.0357932	0.400221	0.0474097	25.5924	19.3834	17.4152	36.1981	19.835	48.8959	36.4561	20.797	28.0165	42.676	Dubious open reading frame; unlikely to encode a functional protein, based on available experimental and comparative sequence data	GO:0003674,GO:0005575,GO:0008150
YDR368W	YPR1	chrIV	1213904	1214842	0	3608.62	-0.23415	0.12572	-1.86247	0.0625375	0.400575	0.0475443	3508.49	3401.79	3377.58	3560.4	3346.44	3788.84	4276.82	3429.29	3453.42	4032.83	NADPH-dependent aldo-keto reductase; reduces multiple substrates including 2-methylbutyraldehyde and D,L-glyceraldehyde, expression is induced by osmotic and oxidative stress; functionally redundant with other aldo-keto reductases; protein abundance increases in response to DNA replication stress; YPR1 has a paralog, GCY1, that arose from the whole genome duplication	GO:0004032,GO:0004090,GO:0005634,GO:0005737,GO:0019568,GO:0034599,GO:0042843
YKL077W	YKL077W	chrXI	291453	292631	0	4356.14	-0.302317	0.172311	-1.75448	0.0793483	0.402167	0.0477975	3986.6	3736.96	4705.98	3578.04	4266.41	5831.73	4387.23	4143.18	3922.22	5109.48	Putative protein of unknown function; green fluorescent protein (GFP)-fusion protein localizes to the vacuole	GO:0000324,GO:0003674,GO:0008150
YJR113C	RSM7	chrX	638232	638975	1	1005.46	0.357158	0.163221	2.18819	0.028656	0.403647	0.0480379	1007.41	1032.98	1127.15	1081.3	1141.93	713.165	934.317	1055.85	1111.61	823.741	Mitochondrial ribosomal protein of the small subunit; has similarity to E. coli S7 ribosomal protein	GO:0003735,GO:0005739,GO:0005763,GO:0032543
YLR154W-B	YLR154W-B	chrXII	454392	454556	0	11737.6	-2.44804	1.49663	-1.63571	0.101901	0.404632	0.0482197	2247.48	4253.05	1549.95	42164.2	2661.67	1426.33	27860.8	2683.49	22413	14643.5	Dubious open reading frame; unlikely to encode a functional protein, based on available experimental and comparative sequence data; encoded within the 25S rRNA gene on the opposite strand	GO:0003674,GO:0005575,GO:0008150
YDR077W	SED1	chrIV	600793	601809	0	58031	-0.309573	0.166848	-1.85542	0.0635361	0.404793	0.0483035	56185.9	50392.9	49821.1	71170.9	49425.9	61585	67635.4	52133.3	60298.4	64610.2	Major stress-induced structural GPI-cell wall glycoprotein; associates with translating ribosomes, possible role in mitochondrial genome maintenance; ORF contains two distinct variable minisatellites; SED1 has a paralog, SPI1, that arose from the whole genome duplication	GO:0000002,GO:0005199,GO:0005739,GO:0005840,GO:0009277,GO:0031505
YDR013W	PSF1	chrIV	473157	473783	0	650.325	0.354268	0.169089	2.09515	0.0361576	0.405473	0.0487057	637.484	686.497	739.179	650.637	761.285	585.558	491.636	687.72	705.961	538.597	Subunit of the GINS complex (Sld5p, Psf1p, Psf2p, Psf3p); complex is localized to DNA replication origins and implicated in assembly of the DNA replication machinery	GO:0000727,GO:0000811,GO:0003674,GO:0006261,GO:0031261,GO:0031298
YGR233C	PHO81	chrVII	954674	958210	1	1440.73	-0.283745	0.143839	-1.97266	0.0485344	0.405473	0.0485344	1334.3	1317.27	1539.31	1246.51	1245.83	1801.99	1599.9	1396.96	1246.17	1700.95	Cyclin-dependent kinase (CDK) inhibitor; regulates Pho80p-Pho85p and Pcl7p-Pho85p cyclin-CDK complexes in response to phosphate levels; inhibitory activity for Pho80p-Pho85p requires myo-D-inositol heptakisphosphate (IP7) generated by Vip1p; relative distribution to the nucleus increases upon DNA replication stress	GO:0004861,GO:0005634,GO:0005737,GO:0006796
YHR128W	FUR1	chrVIII	362115	362765	0	4056.18	0.329248	0.167078	1.97062	0.0487671	0.405473	0.0487671	4197.16	4374.2	3805.23	4777.22	4673.5	2704.78	3861.22	4125.53	4725.36	3283	Uracil phosphoribosyltransferase; synthesizes UMP from uracil; involved in the pyrimidine salvage pathway	GO:0004845,GO:0005622,GO:0008655
YJL191W	RPS14B	chrX	73787	74611	0	3794.17	0.223654	0.137199	1.63014	0.103071	0.405473	0.0487733	4121.55	4021.25	4035.49	3638.37	3791.31	3106.68	3844.55	4059.43	3714.84	3475.62	Protein component of the small (40S) ribosomal subunit; required for ribosome assembly and 20S pre-rRNA processing; mutations confer cryptopleurine resistance; homologous to mammalian ribosomal protein S14 and bacterial S11; RPS14B has a paralog, RPS14A, that arose from the whole genome duplication	GO:0000028,GO:0000462,GO:0002181,GO:0003735,GO:0022627,GO:0032040,GO:0070181
YMR186W	HSC82	chrXIII	632355	634472	0	26659.2	0.299627	0.161781	1.85205	0.0640185	0.405473	0.0486702	29089.3	29327.1	25951.6	28946.4	27604.6	18968	26727.5	28122.7	28275.5	22847.8	Cytoplasmic chaperone of the Hsp90 family; plays a role in determining prion variants; redundant in function and nearly identical with Hsp82p, and together they are essential; expressed constitutively at 10-fold higher basal levels than HSP82 and induced 2-3 fold by heat shock; contains two acid-rich unstructured regions that promote the solubility of chaperone-substrate complexes; HSC82 has a pa…	GO:0000492,GO:0000723,GO:0005737,GO:0005739,GO:0005886,GO:0006457,GO:0006458,GO:0016887,GO:0034605,GO:0042026,GO:0042623,GO:0043248,GO:0051082
YPL205C	YPL205C	chrXVI	163922	164266	1	183.394	-0.575943	0.28353	-2.03133	0.0422218	0.405473	0.0487165	198.923	171.22	108.361	188.416	141.678	264.754	210.404	159.502	165.047	237.579	Hypothetical protein; deletion of locus affects telomere length	GO:0003674,GO:0005575,GO:0030437,GO:0045944
YJR062C	NTA1	chrX	553476	554849	1	755.071	-0.367428	0.197397	-1.86137	0.0626919	0.406068	0.0489098	727.058	687.304	576.637	944.862	637.553	886.089	825.99	663.667	791.207	856.04	Amidase; removes the amide group from N-terminal asparagine and glutamine residues to generate proteins with N-terminal aspartate and glutamate residues that are targets of ubiquitin-mediated degradation	GO:0005739,GO:0006464,GO:0008418,GO:0030163,GO:0070773
YGR008C	STF2	chrVII	508110	508364	1	3677.37	-0.406001	0.232938	-1.74295	0.0813417	0.406265	0.0489984	2819.82	2892.17	3879.72	2900.49	4775.51	5038.66	3435.2	3197.24	3838	4236.93	Protein involved in resistance to desiccation stress; Stf2p exhibits antioxidant properties, and its overexpression prevents ROS accumulation and apoptosis; binds to F0 sector of mitochondrial F1F0 ATPase in vitro and may modulate the inhibitory action of Inh1p and Stf1p; protein abundance increases in response to DNA replication stress; STF2 has a paralog, TMA10, that arose from the whole genome…	GO:0003674,GO:0005737,GO:0071465
YCR069W	CPR4	chrIII	239055	240011	0	3714.22	-0.30877	0.166023	-1.85981	0.062913	0.406749	0.0491304	3395.65	3270.15	4018.08	3139.95	3352.11	5061.32	3762.27	3561.29	3246.03	4411.79	Peptidyl-prolyl cis-trans isomerase (cyclophilin); catalyzes the cis-trans isomerization of peptide bonds N-terminal to proline residues; has a potential role in the secretory pathway; CPR4 has a paralog, CPR8, that arose from the whole genome duplication	GO:0003755,GO:0008150,GO:0016020
YLR388W	RPS29A	chrXII	898158	898821	0	17123.6	0.440761	0.271086	1.62591	0.103969	0.406749	0.0491979	15735.9	22586.5	21384	9782.76	21048.7	17579.9	11747.2	19902.1	15415.7	14663.5	Protein component of the small (40S) ribosomal subunit; homologous to mammalian ribosomal protein S29 and bacterial S14; RPS29A has a paralog, RPS29B, that arose from the whole genome duplication	GO:0002181,GO:0003735,GO:0022627
YLR431C	ATG23	chrXII	1000342	1001703	1	394.311	-0.399736	0.191886	-2.0832	0.0372329	0.406749	0.0493167	379.233	344.056	359.915	404.676	321.138	420.982	530.175	361.068	362.907	475.579	Peripheral membrane protein required for autophagy and CVT; required for cytoplasm-to-vacuole targeting (Cvt) pathway and efficient macroautophagy; cycles between the phagophore assembly site (PAS) and non-PAS locations; forms a complex with Atg9p and Atg27p	GO:0000407,GO:0003674,GO:0016239,GO:0019898,GO:0032258,GO:0034497,GO:0044805
YMR242C	RPL20A	chrXIII	753225	754220	1	21248.6	0.208844	0.128524	1.62494	0.104175	0.406749	0.0492954	21793.1	23095.4	21811.6	22685	20881.5	17711.1	20762.2	22233.4	21783.3	19236.7	Ribosomal 60S subunit protein L20A; homologous to mammalian ribosomal protein L18A, no bacterial homolog; RPL20A has a paralog, RPL20B, that arose from the whole genome duplication	GO:0002181,GO:0003735,GO:0022625
YMR096W	SNZ1	chrXIII	458408	459301	0	596.651	-0.302843	0.156582	-1.93408	0.0531029	0.410002	0.0497853	575.83	553.236	514.716	567.103	614.884	640.417	710.372	547.927	590.994	675.395	Protein involved in vitamin B6 biosynthesis; member of a stationary phase-induced gene family; coregulated with SNO1; interacts with Sno1p and with Yhr198p, perhaps as a multiprotein complex containing other Snz and Sno proteins	GO:0004359,GO:0008615,GO:0009228,GO:1903600
YMR194W	RPL36A	chrXIII	651145	651910	0	11733.6	0.263895	0.142384	1.8534	0.0638244	0.410002	0.0498421	12222.7	12809.2	13314.9	9927.55	12569.7	10190.6	11100.4	12782.3	11248.6	10645.5	Ribosomal 60S subunit protein L36A; N-terminally acetylated; binds to 5.8 S rRNA; homologous to mammalian ribosomal protein L36, no bacterial homolog; RPL36A has a paralog, RPL36B, that arose from the whole genome duplication	GO:0002181,GO:0003723,GO:0003735,GO:0022625
YBR271W	EFM2	chrII	744852	746111	0	809.961	0.287504	0.155258	1.85178	0.064057	0.410554	0.0499748	899.225	829.449	867.858	907.736	748.062	689.313	728.08	865.511	827.899	708.696	S-adenosylmethionine-dependent methyltransferase; seven-beta-strand lysine methyltransferase which dimethylates translation elongation factor EF2 (Eft1p and Eft2p) at lysine 613 and methylates EF3 (Yef3p) at lysine 187; green fluorescent protein (GFP)-fusion protein localizes to the cytoplasm; involved in regulation of translational termination; predicted involvement in ribosome biogenesis	GO:0005737,GO:0008757,GO:0016279,GO:0018022,GO:0018027,GO:0045905
YNL101W	AVT4	chrXIV	434999	437140	0	1569.62	-0.315495	0.141714	-2.22629	0.0259951	0.41078	0.0500679	1555.32	1505.45	1382.57	1492.47	1364.84	1970.15	1716.56	1481.11	1428.65	1843.35	Vacuolar transporter; exports large neutral amino acids from the vacuole; member of a family of seven S. cerevisiae genes (AVT1-7) related to vesicular GABA-glycine transporters	GO:0000324,GO:0000329,GO:0005302,GO:0015186,GO:0015188,GO:0016021,GO:0032974
YDL079C	MRK1	chrIV	312951	314748	1	727.986	0.312806	0.150194	2.08268	0.0372805	0.411107	0.0502182	727.058	831.872	813.678	718.392	730.116	657.113	617.67	790.869	724.254	637.392	Glycogen synthase kinase 3 (GSK-3) homolog; one of four GSK-3 homologs in S. cerevisiae that function to activate Msn2p-dependent transcription of stress responsive genes and that function in protein degradation; MRK1 has a paralog, RIM11, that arose from the whole genome duplication	GO:0004674,GO:0005575,GO:0006468,GO:0034605,GO:0042176,GO:0071472
YNR023W	SNF12	chrXIV	670418	672118	0	829.364	0.279246	0.142624	1.95792	0.0502391	0.411107	0.0502391	851.53	843.179	862.053	964.353	880.295	683.35	720.788	852.254	922.324	702.069	73 kDa subunit of the SWI/SNF chromatin remodeling complex; involved in transcriptional regulation; relocates to the cytosol under hypoxic conditions; deletion mutants are temperature-sensitive; SNF12 has a paralog, RSC6, that arose from the whole genome duplication	GO:0005634,GO:0005829,GO:0015616,GO:0016514,GO:0045944,GO:0061412
YDR171W	HSP42	chrIV	806621	807748	0	1788.59	-0.287944	0.147211	-1.95599	0.0504658	0.412423	0.0504658	1554.16	1587.83	1542.21	2096.7	1927.77	1688.7	2122.78	1561.4	2012.24	1905.74	Small heat shock protein (sHSP) with chaperone activity; forms barrel-shaped oligomers that suppress unfolded protein aggregation; involved in cytoskeleton reorganization after heat shock; protein abundance increases and forms cytoplasmic foci in response to DNA replication stress	GO:0005737,GO:0005832,GO:0005856,GO:0007010,GO:0051082
YKL089W	MIF2	chrXI	273394	275043	0	565.834	0.304152	0.157887	1.9264	0.054055	0.413077	0.0506779	579.32	543.544	541.807	685.907	711.226	478.226	420.807	554.89	698.566	449.517	Protein required for structural integrity of elongating spindles; localizes to the kinetochore; interacts with histones H2A, H2B, and H4; phosphorylated by Ipl1p; orthologous to human centromere constitutive-associated network (CCAN) subunit CENP-C and fission yeast cnp3	GO:0000780,GO:0000818,GO:0007059,GO:0019237,GO:0030472
YPL266W	DIM1	chrXVI	39121	40077	0	1561.22	0.358854	0.152281	2.35652	0.0184472	0.413077	0.050629	1663.51	1571.67	1624.45	1732.87	1811.59	1099.56	1424.91	1619.88	1772.23	1262.24	Essential 18S rRNA dimethylase (dimethyladenosine transferase); responsible for conserved m6(2)Am6(2)A dimethylation in 3'-terminal loop of 18S rRNA, part of 90S and 40S pre-particles in nucleolus, involved in pre-ribosomal RNA processing	GO:0000154,GO:0000179,GO:0000462,GO:0030686
YBR249C	ARO4	chrII	716882	717994	1	6763.14	0.339613	0.185499	1.8308	0.0671298	0.413757	0.0510356	7574.2	7508.66	6666.16	7395.54	6741.06	4441.18	7015.19	7249.67	7068.3	5728.18	3-deoxy-D-arabino-heptulosonate-7-phosphate (DAHP) synthase; catalyzes the first step in aromatic amino acid biosynthesis and is feedback-inhibited by tyrosine or high concentrations of phenylalanine or tryptophan; relative distribution to the nucleus increases upon DNA replication stress	GO:0003849,GO:0005634,GO:0005737,GO:0009423
YJL121C	RPE1	chrX	190374	191090	1	3697.16	0.285514	0.155925	1.8311	0.0670858	0.413757	0.0510022	3736.5	3958.26	4026.79	3718.19	4030.28	2723.86	3686.23	3907.18	3874.23	3205.04	D-ribulose-5-phosphate 3-epimerase; catalyzes a reaction in the non-oxidative part of the pentose-phosphate pathway; mutants are sensitive to oxidative stress	GO:0004750,GO:0005829,GO:0006098
YJL177W	RPL17B	chrX	90786	91657	0	20642.2	0.238597	0.129428	1.84347	0.0652603	0.413757	0.0509634	21199.8	21942	22640.8	20546.6	20996.7	16879.8	20289.4	21927.5	20771.7	18584.6	Ribosomal 60S subunit protein L17B; homologous to mammalian ribosomal protein L17 and bacterial L22; RPL17B has a paralog, RPL17A, that arose from the whole genome duplication	GO:0002181,GO:0003735,GO:0022625
YOR063W	RPL3	chrXV	444686	445849	0	92524	0.270822	0.157061	1.72431	0.0846513	0.413757	0.050992	103516	106014	96969.9	77954.8	93854.4	72854.9	96504.4	102166	85904.6	84679.7	Ribosomal 60S subunit protein L3; homologous to mammalian ribosomal protein L3 and bacterial L3; plays an important role in function of eIF5B in stimulating 3' end processing of 18S rRNA in context of 80S ribosomes that have not yet engaged in translation; involved in replication and maintenance of killer double stranded RNA virus	GO:0000027,GO:0002181,GO:0003735,GO:0022625,GO:0030687
YOR309C	YOR309C	chrXV	896698	897078	1	812.74	0.459156	0.221214	2.07562	0.0379289	0.413757	0.0510917	779.406	1041.05	804.003	985.701	806.622	490.152	782.243	874.82	896.162	636.197	Dubious open reading frame; unlikely to encode a functional protein, based on available experimental and comparative sequence data; partially overlaps the verified gene NOP58	GO:0003674,GO:0005575,GO:0008150
YOL123W	HRP1	chrXV	87844	89448	0	3609.57	0.272257	0.169633	1.60497	0.108499	0.415246	0.0513419	3931.93	3884.76	3463.69	4225.89	3535.35	2614.14	3611.23	3760.13	3880.62	3112.69	Subunit of cleavage factor I; cleavage factor I is a five-subunit complex required for the cleavage and polyadenylation of pre-mRNA 3' ends; RRM-containing heteronuclear RNA binding protein and hnRNPA/B family member that binds to poly (A) signal sequences; required for genome stability	GO:0003723,GO:0003729,GO:0005634,GO:0005737,GO:0005849,GO:0006378,GO:0006379,GO:0010494,GO:0072423
YCR030C	SYP1	chrIII	173826	176438	1	2410.76	-0.282572	0.145368	-1.94384	0.0519144	0.415891	0.0519144	2291.69	2193.56	2481.67	1952.84	2305.58	3022.01	2627.96	2322.3	2129.21	2824.98	Negative regulator of WASP-Arp23 complex; involved in endocytic site formation; directly inhibits Las17p stimulation of Arp23 complex-mediated actin assembly in vitro; may regulate assembly and disassembly of the septin ring; colocalizes and interacts with septin subunits; potential role in actin cytoskeletal organization	GO:0000147,GO:0001400,GO:0004857,GO:0005628,GO:0005934,GO:0005935,GO:0032185,GO:0043086,GO:0043332,GO:0061645
YDL228C	YDL228C	chrIV	45277	45918	1	273.083	0.539665	0.287369	1.87795	0.0603875	0.415891	0.0516403	346.661	340.825	300.896	153.146	317.36	186.043	266.65	329.461	235.253	226.347	Dubious open reading frame; unlikely to encode a functional protein, based on available experimental and comparative sequence data; almost completely overlaps the verified gene SSB1	GO:0003674,GO:0005575,GO:0008150
YGR016W	YGR016W	chrVII	522261	522833	0	151.924	-0.519052	0.267476	-1.94055	0.0523127	0.415891	0.0520041	123.309	111.455	161.575	155.002	133.178	220.628	158.323	132.113	144.09	189.476	Putative protein of unknown function	GO:0003674,GO:0008150,GO:0016021
YHR105W	YPT35	chrVIII	324766	325410	0	103.027	-0.568697	0.292133	-1.9467	0.0515704	0.415891	0.0515704	76.7773	87.2255	91.9137	122.516	88.7851	146.688	107.285	85.3055	105.651	126.986	Endosomal protein of unknown function; contains a phox (PX) homology domain; binds to both phosphatidylinositol-3-phosphate (PtdIns(3)P) and proteins involved in ER-Golgi or vesicular transport	GO:0005768,GO:0008150,GO:0032266
YIL130W	ASG1	chrIX	102782	105676	0	1056.22	-0.34296	0.165742	-2.06924	0.0385237	0.415891	0.0518929	971.35	1002.29	919.137	1161.12	892.574	1319	1128.05	964.257	1026.85	1223.53	Zinc cluster protein proposed to be a transcriptional regulator; regulator involved in the stress response; null mutants have a respiratory deficiency, calcofluor white sensitivity and slightly increased cycloheximide resistance	GO:0005634,GO:0008150,GO:0043565
YLR154W-E	ART3	chrXII	455433	455636	0	476.196	-2.52755	1.22007	-2.07164	0.0382989	0.415891	0.05159	66.3077	211.602	140.289	1195.46	111.454	255.213	1353.04	139.4	653.459	804.127	Dubious open reading frame; unlikely to encode a functional protein, based on available experimental and comparative sequence data; encoded within the 35S rRNA gene on the opposite strand	GO:0003674,GO:0005575,GO:0008150
YLR222C-A	YLR222C-A	chrXII	582006	582236	1	106.644	0.665822	0.322872	2.06218	0.0391904	0.415891	0.0519095	105.86	138.107	151.899	64.9709	119.01	82.2883	84.3697	131.955	91.9904	83.329	Dubious open reading frame; unlikely to encode a functional protein, based on available experimental and comparative sequence data; partially overlaps the verified gene IFH1	GO:0003674,GO:0005575,GO:0008150
YOR232W	MGE1	chrXV	774573	775259	0	4263.45	0.200685	0.125546	1.5985	0.109932	0.415891	0.0520196	4470.53	4226.4	4302.53	4549.82	4755.67	3530.05	4009.13	4333.15	4652.74	3769.59	Mitochondrial matrix cochaperone; nucleotide release factor for Ssc1p in protein translocation and folding; also acts as cochaperone for Ssq1p in folding of Fe-S cluster proteins; acts as oxidative sensor to regulate mitochondrial Ssc1p; in presence of oxidative stress, dimeric Mge1p becomes a monomer and unable to regulate Ssc1p function; homolog of E. coli GrpE and human Mge1 (GRPEL1), which al…	GO:0000774,GO:0001405,GO:0005739,GO:0005759,GO:0030150,GO:0042026
YPL090C	RPS6A	chrXVI	377291	378395	1	33511.8	0.211918	0.13244	1.6001	0.109576	0.415891	0.0518513	35770.1	37171	36480	28128.7	34051	30031.6	32950	36473.7	31089.8	31490.8	Protein component of the small (40S) ribosomal subunit; homologous to mammalian ribosomal protein S6, no bacterial homolog; RPS6A has a paralog, RPS6B, that arose from the whole genome duplication	GO:0000462,GO:0002181,GO:0003735,GO:0022627,GO:0030686,GO:0032040
YGR121C	MEP1	chrVII	731449	732927	1	1158.89	-0.380926	0.162442	-2.345	0.0190268	0.416428	0.0522198	1122.58	1053.17	1169.72	1004.26	857.627	1627.88	1277	1115.16	930.945	1452.44	Ammonium permease; belongs to a ubiquitous family of cytoplasmic membrane proteins that transport only ammonium (NH4+); expression is under the nitrogen catabolite repression regulation; MEP1 has a paralog, MEP3, that arose from the whole genome duplication	GO:0005886,GO:0008519,GO:0015696,GO:0016021,GO:0019740
YML073C	RPL6A	chrXIII	123227	124172	1	20663.3	0.261794	0.134838	1.94155	0.052192	0.416428	0.052192	21793.1	22232.8	23081	18936.2	21287.7	16926.3	20386.2	22369	20111.9	18656.3	Ribosomal 60S subunit protein L6A; N-terminally acetylated; binds 5.8S rRNA; homologous to mammalian ribosomal protein L6, no bacterial homolog; RPL6A has a paralog, RPL6B, that arose from the whole genome duplication	GO:0000027,GO:0002181,GO:0003723,GO:0003735,GO:0022625
YGL104C	VPS73	chrVII	308713	310173	1	798.294	-0.402569	0.21984	-1.83119	0.0670727	0.416756	0.0523275	685.179	690.535	881.404	635.786	704.614	1242.67	747.87	752.373	670.2	995.271	Mitochondrial protein; mutation affects vacuolar protein sorting; putative transporter; member of the sugar porter family; VPS73 has a paralog, YBR241C, that arose from the whole genome duplication	GO:0005739,GO:0006623,GO:0006810,GO:0016021,GO:0022891,GO:0055085
YMR296C	LCB1	chrXIII	859215	860891	1	6275.88	-0.346377	0.178599	-1.93941	0.0524514	0.417212	0.0524514	5910.69	5382.94	6762.91	4967.49	5601.96	9040.97	6264.19	6018.85	5284.73	7652.58	Component of serine palmitoyltransferase; responsible along with Lcb2p for the first committed step in sphingolipid synthesis, which is the condensation of serine with palmitoyl-CoA to form 3-ketosphinganine	GO:0004758,GO:0017059,GO:0030148,GO:0035339
YPR061C	JID1	chrXVI	675977	676882	1	193.86	0.473246	0.236721	1.99917	0.0455896	0.417881	0.0526023	216.372	174.451	217.69	202.338	254.077	159.806	132.283	202.838	228.207	146.045	Probable Hsp40p co-chaperone; has a DnaJ-like domain and appears to be involved in ER-associated degradation of misfolded proteins containing a tightly folded cytoplasmic domain; inhibits replication of Brome mosaic virus in S. cerevisiae	GO:0003674,GO:0005739,GO:0008150
YDL208W	NHP2	chrIV	87512	87982	0	4752.79	0.231029	0.119267	1.93707	0.0527366	0.417892	0.0527366	4670.62	4997.7	4941.08	5136.41	5225.1	4008.27	4290.36	4869.8	5180.76	4149.32	Protein related to mammalian high mobility group (HMG) proteins; nuclear protein; essential for function of H/ACA-type snoRNPs, which are involved in 18S rRNA processing	GO:0000469,GO:0030515,GO:0031118,GO:0031120,GO:0031429
YEL067C	YEL067C	chrV	26189	26776	1	93.6933	-0.633236	0.327336	-1.93451	0.0530502	0.417892	0.0527372	86.0837	75.1108	69.6609	108.594	77.4509	151.458	87.4945	76.9518	93.0225	119.476	Putative protein of unknown function; the authentic, non-tagged protein is detected in highly purified mitochondria in high-throughput studies	GO:0003674,GO:0005739,GO:0008150
YDL081C	RPP1A	chrIV	309802	310122	1	35721.3	0.334812	0.196091	1.70743	0.0877416	0.418284	0.0528535	35650.3	37561.1	45893.9	26079.3	41905.6	32522.9	30435.6	39701.8	33992.5	31479.3	Ribosomal stalk protein P1 alpha; involved in the interaction between translational elongation factors and the ribosome; free (non-ribosomal) P1 stimulates the phosphorylation of the eIF2 alpha subunit (Sui2p) by Gcn2p; accumulation of P1 in the cytoplasm is regulated by phosphorylation and interaction with the P2 stalk component	GO:0002181,GO:0003735,GO:0022625,GO:0030295,GO:0045860
YLR251W	SYM1	chrXII	641464	642057	0	582.372	-0.414581	0.214337	-1.93425	0.0530821	0.419182	0.0530821	553.727	465.202	643.396	434.377	502.486	883.704	593.713	554.108	468.431	738.709	Protein required for ethanol metabolism; induced by heat shock and localized to the inner mitochondrial membrane; homologous to mammalian peroxisomal membrane protein Mpv17	GO:0003674,GO:0005739,GO:0005743,GO:0006067,GO:0016021
YNL126W	SPC98	chrXIV	387227	389767	0	805.91	0.293432	0.142459	2.05977	0.0394205	0.419182	0.0531008	798.019	845.602	816.58	897.526	944.523	688.121	651.001	820.067	921.024	669.561	Component of the microtubule-nucleating Tub4p (gamma-tubulin) complex; interacts with Spc110p at the spindle pole body (SPB) inner plaque and with Spc72p at the SPB outer plaque	GO:0000928,GO:0005200,GO:0005822,GO:0005824,GO:0007020,GO:0030472
YCL043C	PDI1	chrIII	48653	50221	1	29128.5	-0.281757	0.155684	-1.8098	0.0703272	0.421537	0.0534665	26917.4	24968.3	33204.1	24315.8	25532.3	37154.9	31806.4	28363.3	24924.1	34480.6	Protein disulfide isomerase; multifunctional protein of ER lumen, essential for formation of disulfide bonds in secretory and cell-surface proteins, unscrambles non-native disulfide bonds; key regulator of Ero1p; forms complex with Mnl1p that has exomannosidase activity, processing unfolded protein-bound Man8GlcNAc2 oligosaccharides to Man7GlcNAc2, promoting degradation in unfolded protein respon…	GO:0003756,GO:0005515,GO:0005788,GO:0006457,GO:0015035,GO:0051082
YER124C	DSE1	chrV	407342	409063	1	5865.17	-0.182388	0.11522	-1.58295	0.113433	0.422443	0.0536767	5886.26	5775.46	5547.71	5515.1	5312.94	6530.59	6488.14	5736.48	5414.02	6509.36	Daughter cell-specific protein; may regulate cross-talk between the mating and filamentation pathways; deletion affects cell separation after division and sensitivity to alpha-factor and drugs affecting the cell wall; relocalizes from bud neck to cytoplasm upon DNA replication stress	GO:0001403,GO:0003674,GO:0005935,GO:0007109,GO:0010969
YJR126C	VPS70	chrX	656254	658689	1	2350.85	-0.329925	0.208473	-1.58258	0.113517	0.422443	0.0537164	2153.26	2048.99	2427.49	1802.48	2467.09	3411.98	2144.66	2209.91	2134.79	2778.32	Protein of unknown function involved in vacuolar protein sorting	GO:0003674,GO:0005575,GO:0006623
YBR089C-A	NHP6B	chrII	426190	426873	1	1130.84	0.352982	0.15131	2.33284	0.0196564	0.422939	0.0539477	1273.81	1224.39	1277.12	1024.68	1146.65	884.897	1084.31	1258.44	1085.67	984.602	High-mobility group (HMG) protein; binds to and remodels nucleosomes; involved in recruiting FACT and other chromatin remodelling complexes to the chromosomes; functionally redundant with Nhp6Ap; required for transcriptional initiation fidelity of some tRNA genes; homologous to mammalian HMGB1 and HMGB2; NHP6B has a paralog, NHP6A, that arose from the whole genome duplication	GO:0001195,GO:0005634,GO:0006338,GO:0006366,GO:0008301,GO:0031491,GO:0043565,GO:0070898
YJL093C	TOK1	chrX	254737	256812	1	1492.58	-0.396437	0.193103	-2.05298	0.0400747	0.422939	0.0539821	1442.48	1299.5	1465.78	1193.61	1353.5	2259.95	1433.24	1402.59	1273.55	1846.59	Outward-rectifier potassium channel of the plasma membrane; has two pore domains in tandem, each of which forms a functional channel permeable to potassium; carboxy tail functions to prevent inner gate closures; target of K1 toxin	GO:0005249,GO:0005267,GO:0005886,GO:0016021,GO:0030007
YKL006W	RPL14A	chrXI	431906	432720	0	29212	0.276588	0.175038	1.58016	0.114071	0.422939	0.0539786	31994	34439.5	32611.9	20149.3	30778.2	25962.5	28548.2	33015.2	25463.8	27255.4	Ribosomal 60S subunit protein L14A; N-terminally acetylated; homologous to mammalian ribosomal protein L14, no bacterial homolog; RPL14A has a paralog, RPL14B, that arose from the whole genome duplication	GO:0002181,GO:0003723,GO:0003735,GO:0022625
YKR059W	TIF1	chrXI	554987	556174	0	16793.1	0.26245	0.144574	1.81533	0.0694731	0.424532	0.0542533	17393.6	17072	17726.8	19520	16833.3	12813.1	16192.7	17397.4	18176.7	14502.9	Translation initiation factor eIF4A; DEA(D/H)-box RNA helicase that couples ATPase activity to RNA binding and unwinding; forms a dumbbell structure of two compact domains connected by a linker; interacts with eIF4G; protein abundance increases in response to DNA replication stress; TIF1 has a paralog, TIF2, that arose from the whole genome duplication	GO:0003743,GO:0004004,GO:0005737,GO:0005840,GO:0006413,GO:0006446,GO:0008186,GO:0016281
YDL136W	RPL35B	chrIV	217600	218367	0	17731	0.264769	0.146929	1.80202	0.0715429	0.425076	0.0543907	17479.6	19842.2	19143.2	15826.9	20492.4	15345	15987.5	18821.7	18159.6	15666.3	Ribosomal 60S subunit protein L35B; homologous to mammalian ribosomal protein L35 and bacterial L29; RPL35B has a paralog, RPL35A, that arose from the whole genome duplication	GO:0000463,GO:0002181,GO:0003735,GO:0022625,GO:0030687
YFL055W	AGP3	chrVI	17004	18680	0	156.694	-0.553472	0.287869	-1.92265	0.0545234	0.425582	0.0545234	141.922	158.298	109.329	153.146	132.233	254.02	147.907	136.516	142.689	200.964	Low-affinity amino acid permease; may act to supply the cell with amino acids as nitrogen source in nitrogen-poor conditions; transcription is induced under conditions of sulfur limitation; plays a role in regulating Ty1 transposition	GO:0005886,GO:0006865,GO:0015171,GO:0016021,GO:0055085
YER015W	FAA2	chrV	184541	186775	0	333.864	-0.361053	0.182205	-1.98158	0.0475267	0.426437	0.0548374	335.028	331.134	287.351	302.579	264.466	418.597	397.892	317.838	283.522	408.244	Medium chain fatty acyl-CoA synthetase; activates imported fatty acids; accepts a wide range of fatty acid chain lengths with a preference for medium chains, C9:0-C13:0; localized to the peroxisome; comparative analysis suggests that a mitochondrially targeted form may result from translation starting at a non-canonical codon upstream of the annotated start codon	GO:0001676,GO:0004467,GO:0005739,GO:0005777,GO:0031956,GO:0031957
YGR224W	AZR1	chrVII	942806	944647	0	399.858	-0.331475	0.172559	-1.92093	0.05474	0.426437	0.05474	390.866	348.094	387.972	387.969	340.028	455.567	488.511	375.644	363.999	472.039	Plasma membrane transporter of the major facilitator superfamily; involved in resistance to azole drugs such as ketoconazole and fluconazole	GO:0005886,GO:0016021,GO:0045117,GO:0045118
YNL244C	SUI1	chrXIV	187170	187496	1	7638.36	0.348856	0.181663	1.92034	0.0548147	0.426437	0.0548147	7441.58	8745.97	8450.25	6315.17	9617.13	6814.42	6084	8212.6	7966.15	6449.21	Translation initiation factor eIF1; component of a complex involved in recognition of the initiator codon; modulates translation accuracy at the initiation phase	GO:0001731,GO:0003743,GO:0016282,GO:0031369,GO:0043024,GO:0043614,GO:1990145
YOR256C	TRE2	chrXV	808254	810683	1	1987.92	-0.39635	0.181006	-2.1897	0.0285459	0.427022	0.0549808	1885.7	1784.08	2023.07	1516.61	1709.59	2993.38	2003	1897.62	1613.1	2498.19	Transferrin receptor-like protein; functions with Tre1p to regulate ubiquitylation and vacuolar degradation of the metal transporter Smf1p; inviability of null mutant in systematic studies is due to proximity to CDC31; TRE2 has a paralog, TRE1, that arose from the whole genome duplication	GO:0003674,GO:0005575,GO:0043328
YBL071C	YBL071C	chrII	90223	90531	1	593.408	0.330926	0.172535	1.91803	0.0551077	0.427092	0.0551077	621.198	718.802	620.175	515.126	638.497	539.048	501.01	653.392	576.812	520.029	Dubious open reading frame; unlikely to encode a functional protein, based on available experimental and comparative sequence data	GO:0003674,GO:0005575,GO:0008150
YBL078C	ATG8	chrII	80378	80731	1	296.691	-0.507903	0.249363	-2.0368	0.0416704	0.427092	0.0551944	300.13	247.946	228.333	336.92	227.63	440.063	295.815	258.803	282.275	367.939	Component of autophagosomes and Cvt vesicles; regulator of Atg1p, targets it to autophagosomes; binds the Atg1p-Atg13p complex, triggering its vacuolar degradation; unique ubiquitin-like protein whose conjugation target is lipid phosphatidylethanolamine (PE); Atg8p-PE is anchored to membranes, is involved in phagophore expansion, and may mediate membrane fusion during autophagosome formation; dec…	GO:0000045,GO:0000329,GO:0000407,GO:0000422,GO:0005776,GO:0005829,GO:0006888,GO:0019898,GO:0031386,GO:0032258,GO:0034629,GO:0034727,GO:0044805,GO:0061025,GO:0071211
YER116C	SLX8	chrV	395348	396172	1	498.587	-0.327718	0.181298	-1.80762	0.0706659	0.427092	0.0551308	446.704	475.702	472.146	527.192	400.478	627.299	540.591	464.851	463.835	583.945	Subunit of Slx5-Slx8 SUMO-targeted ubiquitin ligase (STUbL) complex; stimulated by prior attachment of SUMO to the substrate; contains a C-terminal RING domain; forms nuclear foci upon DNA replication stress; null mutants are aneuploid, have a metaphase delay, and spindle defects including: mispositioned spindles, fish hook spindles, and aberrant spindle kinetics; required for maintenance of geno…	GO:0000723,GO:0004842,GO:0005634,GO:0005737,GO:0006974,GO:0016567,GO:0016925,GO:0033768
YER049W	TPA1	chrV	251728	253662	0	3262.71	0.251391	0.160312	1.56813	0.11685	0.427329	0.0552934	3356.1	3568.97	3048.63	3910.32	3370.06	2425.71	3159.18	3324.57	3640.19	2792.45	Fe(II)/2-oxoglutarate-dependent dioxygenase family member; catalyzes the repair of methyl-base lesions in both ss and dsDNA by oxidative demethylation; Poly(rA)-binding protein involved in mRNA poly(A) tail length and mRNA stability; role in translation termination efficiency; interacts with Sup45p (eRF1), Sup35p (eRF3) and Pab1p; similar to human prolyl 4-hydroxylase OGFOD1; binds Fe(II) and 2-o…	GO:0000288,GO:0005634,GO:0006307,GO:0006415,GO:0008143,GO:0008198,GO:0035516,GO:0070989
YBR139W	YBR139W	chrII	515664	517190	0	3104.57	-0.409303	0.213782	-1.91458	0.055546	0.427698	0.055546	2698.84	2639.38	3375.65	2230.36	3071.59	4722.63	2993.56	2904.62	2650.97	3858.1	Putative serine type carboxypeptidase; role in phytochelatin synthesis; green fluorescent protein (GFP)-fusion protein localizes to the vacuole; expression induced by nitrogen limitation in a GLN3, GAT1-independent manner	GO:0000324,GO:0004185,GO:0017171,GO:0046938
YIL008W	URM1	chrIX	342536	342835	0	1100.56	0.431168	0.185624	2.3228	0.0201896	0.427698	0.0554112	1130.72	1209.85	1241.32	974.563	1375.23	991.037	781.201	1193.96	1174.89	886.119	Ubiquitin-like protein involved in thiolation of cytoplasmic tRNAs; receives sulfur from the E1-like enzyme Uba4p and transfers it to tRNA; also functions as a protein tag with roles in nutrient sensing and oxidative stress response	GO:0001403,GO:0002098,GO:0002143,GO:0005634,GO:0005737,GO:0005829,GO:0007114,GO:0031386,GO:0032447,GO:0034599
YJL165C	HAL5	chrX	106894	109461	1	2191.9	-0.32066	0.141318	-2.26908	0.0232637	0.427698	0.0555105	2370.79	1996.49	2052.09	1847.03	1735.09	2529.47	2812.32	2139.79	1791.06	2670.9	Putative protein kinase; overexpression increases sodium and lithium tolerance, whereas gene disruption increases cation and low pH sensitivity and impairs potassium uptake, suggesting a role in regulation of Trk1p and/or Trk2p transporters; HAL5 has a paralog, KKQ8, that arose from the whole genome duplication	GO:0004672,GO:0005575,GO:0006468,GO:0006470,GO:0030003,GO:0034613
YGR250C	YGR250C	chrVII	991176	993521	1	2272.21	-0.246929	0.136925	-1.80338	0.0713285	0.42779	0.0557022	2147.44	2116.02	1914.71	2507.88	2332.97	2281.41	2605.05	2059.39	2420.42	2443.23	Putative RNA binding protein; localizes to stress granules induced by glucose deprivation; interacts with Rbg1p in a two-hybrid assay; protein abundance increases in response to DNA replication stress	GO:0003723,GO:0003729,GO:0005737,GO:0008150,GO:0010494
YHR071W	PCL5	chrVIII	237004	237693	0	6348.97	0.288163	0.160885	1.79111	0.0732751	0.42779	0.0557077	6597.03	6798.74	7632.7	5379.59	6554.99	5012.43	6467.31	7009.49	5967.29	5739.87	Cyclin; interacts with and phosphorylated by Pho85p cyclin-dependent kinase (Cdk), induced by Gcn4p at level of transcription, specifically required for Gcn4p degradation, may be sensor of cellular protein biosynthetic capacity	GO:0000307,GO:0005634,GO:0016242,GO:0016538,GO:0031647,GO:0043433
YIL148W	RPL40A	chrIX	68708	69528	0	27737.2	0.241394	0.133893	1.80288	0.0714064	0.42779	0.055763	28547.2	28654.4	31644.4	25291.3	29917.8	26158.1	23947.5	29615.3	27604.5	25052.8	Ubiquitin-ribosomal 60S subunit protein L40A fusion protein; cleaved to yield ubiquitin and ribosomal protein L40A; ubiquitin may facilitate assembly of the ribosomal protein into ribosomes; homologous to mammalian ribosomal protein L40, no bacterial homolog; RPL40A has a paralog, RPL40B, that arose from the whole genome duplication; relative distribution to the nucleus increases upon DNA replica…	GO:0000027,GO:0000055,GO:0002181,GO:0003735,GO:0005634,GO:0005737,GO:0016567,GO:0022625,GO:0031386,GO:0042254
YLR295C	ATP14	chrXII	721999	722373	1	3280.96	0.200325	0.128211	1.56246	0.118179	0.428177	0.0559222	3357.26	3386.45	3195.69	3661.57	3599.58	2680.93	3085.22	3313.13	3630.57	2883.08	Subunit h of the F0 sector of mitochondrial F1F0 ATP synthase; F1F0 ATP synthase is a large, evolutionarily conserved enzyme complex required for ATP synthesis; protein abundance increases in response to DNA replication stress	GO:0000276,GO:0005739,GO:0015986,GO:0016021,GO:0016887,GO:0033615,GO:0042407,GO:0046933
YLR328W	NMA1	chrXII	784913	786118	0	1294.92	0.345601	0.158328	2.18282	0.0290492	0.428177	0.0559502	1340.11	1517.56	1241.32	1419.15	1396	965.993	1184.3	1366.33	1407.58	1075.15	Nicotinic acid mononucleotide adenylyltransferase; catalyzes the transfer of the adenylyl moiety of ATP to nicotinamide mononucleotide to form NAD; involved in pathways of NAD biosynthesis, including the de novo, NAD(+) salvage, and nicotinamide riboside salvage pathways; homolog of human NMNAT; NMA1 has a paralog, NMA2, that arose from the whole genome duplication	GO:0000309,GO:0005634,GO:0005737,GO:0009435
YDR179C	CSN9	chrIV	818708	819196	1	279.783	0.458799	0.249523	1.83871	0.0659584	0.430176	0.0564042	271.047	319.827	309.604	242.249	377.809	258.791	179.156	300.159	310.029	218.973	Subunit of the Cop9 signalosome; Cop9 signalosome is required for deneddylation, or removal of the ubiquitin-like protein Rub1p from Cdc53p (cullin); involved in adaptation to pheromone signaling	GO:0000754,GO:0003674,GO:0008180,GO:0010388
YJL096W	MRPL49	chrX	246490	246975	0	1378.26	0.336625	0.176475	1.90749	0.0564573	0.430176	0.0564573	1388.97	1488.49	1623.49	1158.34	1611.36	1277.26	1099.93	1500.31	1384.85	1188.59	Mitochondrial ribosomal protein of the large subunit	GO:0003735,GO:0005739,GO:0005762,GO:0032543
YPL221W	FLC1	chrXVI	133043	135424	0	5742.32	-0.331296	0.173702	-1.90726	0.0564863	0.430176	0.0564863	5992.12	5212.53	5954.07	4197.12	4447.76	8579.44	5813.18	5719.57	4322.44	7196.31	Putative FAD transporter; required for uptake of FAD into endoplasmic reticulum; involved in cell wall maintenance; FLC1 has a paralog, FLC3, that arose from the whole genome duplication	GO:0000324,GO:0005783,GO:0005935,GO:0006457,GO:0009272,GO:0015230,GO:0015883,GO:0016021
YPR043W	RPL43A	chrXVI	654166	654847	0	332.173	-0.405522	0.21251	-1.90825	0.0563595	0.430176	0.0563595	233.822	318.211	329.922	327.639	334.361	436.486	344.77	293.985	331	390.628	Ribosomal 60S subunit protein L43A; null mutation confers a dominant lethal phenotype; homologous to mammalian ribosomal protein L37A, no bacterial homolog; RPL43A has a paralog, RPL43B, that arose from the whole genome duplication	GO:0002181,GO:0003735,GO:0022625
YEL038W	UTR4	chrV	80462	81145	0	1448.37	0.308443	0.162032	1.90359	0.0569632	0.432347	0.0569632	1498.32	1610.44	1546.08	1320.76	1657.64	1121.03	1384.29	1551.62	1489.2	1252.66	Protein with sequence similarity to acireductone synthases; involved in methionine salvage; found in both the cytoplasm and nucleus	GO:0005634,GO:0005737,GO:0019509,GO:0043874
YIL133C	RPL16A	chrIX	98527	99416	1	18589.9	0.243899	0.128134	1.90347	0.0569786	0.432347	0.0569786	19860.9	20500.4	20103	16463.6	19162.5	16115.4	17923.9	20154.8	17813	17019.6	Ribosomal 60S subunit protein L16A; N-terminally acetylated, binds 5.8 S rRNA; transcriptionally regulated by Rap1p; homologous to mammalian ribosomal protein L13A and bacterial L13; RPL16A has a paralog, RPL16B, that arose from the whole genome duplication; protein abundance increases in response to DNA replication stress	GO:0002181,GO:0003723,GO:0003735,GO:0022625
YOR143C	THI80	chrXV	601383	602342	1	1247.54	0.355017	0.163114	2.1765	0.0295177	0.432347	0.0568526	1337.79	1330.19	1326.46	1144.42	1511.24	1115.07	967.648	1331.48	1327.83	1041.36	Thiamine pyrophosphokinase; phosphorylates thiamine to produce the coenzyme thiamine pyrophosphate (thiamine diphosphate)	GO:0004788,GO:0005737,GO:0009229
YCR105W	ADH7	chrIII	309070	310155	0	292.543	-0.3604	0.178363	-2.0206	0.0433212	0.432777	0.057381	269.884	265.715	272.838	283.087	264.466	347.042	344.77	269.479	273.777	345.906	NADPH-dependent medium chain alcohol dehydrogenase; has broad substrate specificity; member of the cinnamyl family of alcohol dehydrogenases; may be involved in fusel alcohol synthesis or in aldehyde tolerance	GO:0005575,GO:0006066,GO:0008106
YDL082W	RPL13A	chrIV	308424	309388	0	18464.2	0.202016	0.121088	1.66833	0.09525	0.432777	0.0573764	19535.2	19771.1	19546.6	17485.5	18803.6	16005.7	18102	19617.6	18144.5	17053.8	Ribosomal 60S subunit protein L13A; not essential for viability; homologous to mammalian ribosomal protein L13, no bacterial homolog; RPL13A has a paralog, RPL13B, that arose from the whole genome duplication	GO:0002181,GO:0003735,GO:0022625
YHR007C-A	YHR007C-A	chrVIII	122550	122765	1	77.676	0.653186	0.344008	1.89875	0.0575972	0.432777	0.0572574	63.9811	104.186	102.556	71.468	85.9516	65.5921	49.9969	90.2411	78.7098	57.7945	Putative protein of unknown function; identified by expression profiling and mass spectrometry	GO:0003674,GO:0005575,GO:0008150
YJL181W	YJL181W	chrX	85660	87495	0	364.151	0.354807	0.186883	1.89856	0.057623	0.432777	0.057283	400.173	422.397	332.824	409.316	381.587	310.072	292.69	385.131	395.452	301.381	Putative protein of unknown function; expression is cell-cycle regulated as shown by microarray analysis; potential regulatory target of Mbp1p, which binds to the YJL181W promoter region; YJL181W has a paralog, YJR030C, that arose from the whole genome duplication	GO:0003674,GO:0005575,GO:0008150
YMR196W	YMR196W	chrXIII	655076	658342	0	2224.78	-0.285316	0.150065	-1.90128	0.0572652	0.432777	0.0572652	2123.01	2030.41	2071.44	2293.47	1999.55	2234.9	2820.66	2074.96	2146.51	2527.78	Putative protein of unknown function; green fluorescent protein (GFP)-fusion protein localizes to the cytoplasm; YMR196W is not an essential gene	GO:0003674,GO:0005737,GO:0008150
YEL008W	YEL008W	chrV	140512	140892	0	41.0542	0.856335	0.450919	1.89909	0.0575529	0.433551	0.0575529	58.1646	45.228	45.4731	38.9825	45.3371	16.6962	37.4977	49.6219	42.1598	27.0969	Hypothetical protein predicted to be involved in metabolism	GO:0003674,GO:0005575,GO:0008150
YGL125W	MET13	chrVII	272520	274322	0	930.343	-0.292524	0.156474	-1.86948	0.0615563	0.434216	0.0577106	978.329	848.833	905.591	845.549	703.669	1171.12	1059.31	910.918	774.609	1115.21	Major isozyme of methylenetetrahydrofolate reductase; catalyzes the reduction of 5,10-methylenetetrahydrofolate to 5-methyltetrahydrofolate in the methionine biosynthesis pathway	GO:0004489,GO:0005739,GO:0009086
YML116W-A	YML116W-A	chrXIII	37472	37774	0	520.582	0.367516	0.193777	1.8966	0.0578813	0.434674	0.0578813	575.83	590.387	565.995	452.012	565.769	373.279	520.801	577.404	508.89	447.04	Putative protein of unknown function	GO:0003674,GO:0005575,GO:0008150
YMR297W	PRC1	chrXIII	861922	863520	0	19317.3	-0.352125	0.185683	-1.89638	0.0579103	0.434674	0.0579103	16994.5	17070.3	21113.1	14066.2	19021.7	26961.9	19993.5	18392.6	16544	23477.7	Vacuolar carboxypeptidase Y (proteinase C, CPY); broad-specificity C-terminal exopeptidase involved in non-specific protein degradation in the vacuole; member of the serine carboxypeptidase family	GO:0000324,GO:0004185,GO:0005737,GO:0005783,GO:0007039,GO:0046938
YDR224C	HTB1	chrIV	914317	914712	1	13536.7	0.182976	0.118562	1.54329	0.12276	0.434981	0.0580901	14211.9	14463.3	13458.1	13951.1	13929.8	11774.4	12967.9	14044.4	13940.5	12371.2	Histone H2B; core histone protein required for chromatin assembly and chromosome function; nearly identical to HTB2; Rad6p-Bre1p-Lge1p mediated ubiquitination regulates reassembly after DNA replication, transcriptional activation, meiotic DSB formation and H3 methylation	GO:0000122,GO:0000788,GO:0003677,GO:0006301,GO:0006333,GO:0031298
YPR158W	CUR1	chrXVI	843262	844020	0	307.726	0.361856	0.198199	1.82572	0.0678925	0.434981	0.0580582	259.414	287.521	335.727	424.167	389.143	220.628	237.485	294.221	406.655	229.057	Sorting factor, central regulator of spatial protein quality control; physically and functionally interacts with chaperones to promote sorting and deposition of misfolded proteins into cytosolic compartments; involved in destabilization of [URE3] prions; CUR1 has a paralog, BTN2, that arose from the whole genome duplication	GO:0005634,GO:0006457,GO:0006886,GO:0034504,GO:0034605,GO:0051087
YOR014W	RTS1	chrXV	357674	359947	0	2367.44	-0.294115	0.155354	-1.8932	0.0583317	0.436269	0.0583317	2455.71	2080.49	2027.91	2419.7	2223.41	2958.8	2406.1	2188.04	2321.55	2682.45	B-type regulatory subunit of protein phosphatase 2A (PP2A); Rts1p and Cdc55p are alternative regulatory subunits for PP2A catalytic subunits, Pph21p and Pph22p; PP2A-Rts1p protects cohesin when recruited by Sgo1p to the pericentromere; highly enriched at centromeres in the absence of Cdc55p; required for maintenance of septin ring organization during cytokinesis, for ring disassembly in G1 and fo…	GO:0000775,GO:0000776,GO:0000780,GO:0005634,GO:0005737,GO:0005816,GO:0005935,GO:0006470,GO:0008601,GO:0031107,GO:0031134,GO:0031578,GO:0032186,GO:0034613,GO:0051754,GO:0070199
YDR155C	CPR1	chrIV	768512	769000	1	28181.4	-0.193281	0.125586	-1.53904	0.123795	0.436753	0.0585799	28650.7	25783.2	29759.7	23348.7	25553.1	31684.6	32489.6	28064.5	24450.9	32087.1	Cytoplasmic peptidyl-prolyl cis-trans isomerase (cyclophilin); catalyzes the cis-trans isomerization of peptide bonds N-terminal to proline residues; binds the drug cyclosporin A; N-terminally propionylated in vivo; protein abundance increases in response to DNA replication stress	GO:0000118,GO:0003729,GO:0003755,GO:0005634,GO:0005739,GO:0005758,GO:0016018,GO:0016575,GO:0030437,GO:0034967,GO:0044267,GO:0045836
YDR358W	GGA1	chrIV	1190059	1191732	0	935.12	-0.272437	0.153078	-1.77973	0.0751201	0.436753	0.0586058	923.655	814.104	883.339	979.204	836.847	999.385	1109.31	873.699	908.025	1054.35	Golgi-localized protein with homology to gamma-adaptin; interacts with and regulates Arf1p and Arf2p in a GTP-dependent manner in order to facilitate traffic through the late Golgi; GGA1 has a paralog, GGA2, that arose from the whole genome duplication	GO:0005802,GO:0006895,GO:0006896,GO:0043130,GO:0043328
YHR022C-A	YHR022C-A	chrVIII	151217	151306	1	23.862	-1.13357	0.580176	-1.95383	0.0507213	0.436753	0.0585233	17.4494	19.3834	19.3502	10.2097	17.9459	60.8218	21.8736	18.7277	14.0778	41.3477	Putative protein of unknown function; identified by gene-trapping, microarray-based expression analysis, and genome-wide homology searching	GO:0003674,GO:0005575,GO:0008150
YDR071C	PAA1	chrIV	588827	589402	1	4232.22	0.216958	0.122053	1.77757	0.0754746	0.438721	0.05894	4294.88	4404.08	4514.41	4228.68	4603.6	3917.64	3662.27	4404.46	4416.14	3789.95	Polyamine acetyltransferase; acetylates polyamines (e.g. putrescine, spermidine, spermine) and also aralkylamines (e.g. tryptamine, phenylethylamine); may be involved in transcription and/or DNA replication	GO:0004059,GO:0004145,GO:0005737,GO:0006325
YOR134W	BAG7	chrXV	578564	579793	0	119.877	-0.51874	0.285447	-1.81729	0.0691732	0.439786	0.0591533	80.2672	118.724	126.744	93.7437	107.676	135.955	176.031	108.578	100.71	155.993	Rho GTPase activating protein (RhoGAP); stimulates the intrinsic GTPase activity of Rho1p, which plays a bud growth by regulating actin cytoskeleton organization and cell wall biosynthesis, resulting in the downregulation of Rho1p; structurally and functionally related to Sac7p; BAG7 has a paralog, SAC7, that arose from the whole genome duplication	GO:0005100,GO:0005575,GO:0032321,GO:0035024
YLR154W-C	TAR1	chrXII	454696	455070	0	40710.8	-2.58591	1.56678	-1.65046	0.0988479	0.441747	0.0595437	6257.35	12315.7	4218.35	163497	7458.9	4082.21	87145.6	7597.15	85478.1	45613.9	Protein potentially involved in regulation of respiratory metabolism; located in the mitochondria; interacts genetically with RPO41 and physically with Coq5p; encoded within the 25S rRNA gene on the opposite strand	GO:0003674,GO:0005739,GO:0043457
YLR306W	UBC12	chrXII	744151	744851	0	529.515	0.342018	0.162726	2.1018	0.0355704	0.441747	0.0596288	525.808	551.62	601.793	556.893	587.493	417.404	465.596	559.74	572.193	441.5	Enzyme that mediates the conjugation of Rub1p; a ubiquitin-like protein, to other proteins; related to E2 ubiquitin-conjugating enzymes	GO:0005575,GO:0019788,GO:0045116
YNL030W	HHF2	chrXIV	576727	577038	0	20825	0.249378	0.141685	1.76008	0.078394	0.441747	0.0595993	20871.8	21894.4	21629.7	23168.6	22096.2	15756.4	20358.1	21465.3	22632.4	18057.3	Histone H4; core histone protein required for chromatin assembly and chromosome function; one of two identical histone proteins (see also HHF1); contributes to telomeric silencing; N-terminal domain involved in maintaining genomic integrity	GO:0000788,GO:0003677,GO:0006333,GO:0034729,GO:0043935
YER141W	COX15	chrV	453459	454919	0	2765.57	-0.221632	0.145194	-1.52646	0.126896	0.442751	0.0600473	2854.72	2754.06	2410.07	2675.87	2432.15	2872.93	3359.17	2672.95	2554.01	3116.05	Protein required for the hydroxylation of heme O to form heme A; heme A is an essential prosthetic group for cytochrome c oxidase	GO:0005739,GO:0005743,GO:0006784,GO:0016021,GO:0016653
YGR296W	YRF1-3	chrVII	1084864	1090591	0	1608.23	-0.310456	0.154503	-2.00939	0.0444959	0.442751	0.0599377	1599.53	1431.14	1491.9	1676.25	1320.44	1966.57	1771.76	1507.52	1498.35	1869.17	Helicase encoded by the Y' element of subtelomeric regions; highly expressed in the mutants lacking the telomerase component TLC1; potentially phosphorylated by Cdc28p	GO:0000722,GO:0003678,GO:0005634
YHL027W	RIM101	chrVIII	51111	52988	0	2442.91	-0.27463	0.166754	-1.64692	0.0995747	0.442751	0.0599815	2583.67	2225.06	2341.38	2434.55	1751.15	2775.14	2989.4	2383.37	2092.85	2882.27	Cys2His2 zinc-finger transcriptional repressor; involved in alkaline responsive gene repression as part of adaptation to alkaline conditions; involved in cell wall assembly; required for alkaline pH-stimulated haploid invasive growth and sporulation; activated by alkaline-dependent proteolytic processing which results in removal of the C-terminal tail; similar to A. nidulans PacC	GO:0000122,GO:0000917,GO:0001078,GO:0005634,GO:0007126,GO:0009272,GO:0030437,GO:0043565,GO:0045944,GO:0071454,GO:0071469
YKL142W	MRP8	chrXI	178515	179174	0	4131.59	-0.217	0.142118	-1.52689	0.126787	0.442751	0.0599958	4365.84	3686.89	4449.59	3469.44	3264.27	4535.39	5149.68	4167.44	3366.86	4842.54	Protein of unknown function; undergoes sumoylation; transcription induced under cell wall stress; protein levels are reduced under anaerobic conditions; protein abundance increases in response to DNA replication stress; originally thought to be a mitochondrial ribosomal protein based on sequence analysis	GO:0003674,GO:0005737,GO:0008150
YCR006C	YCR006C	chrIII	122530	123003	1	92.8123	-0.658126	0.350227	-1.87914	0.0602256	0.443384	0.0602256	114.003	60.5732	59.9858	101.169	68.9502	125.221	119.784	78.1872	85.0595	122.503	Dubious open reading frame; unlikely to encode a functional protein, based on available experimental and comparative sequence data	GO:0003674,GO:0005575,GO:0008150
YKL030W	YKL030W	chrXI	382498	383103	0	85.7661	0.545848	0.301798	1.80865	0.070505	0.443384	0.0602922	83.7571	102.571	96.7512	85.3903	102.008	71.555	58.3297	94.3597	93.6994	64.9424	Dubious open reading frame; unlikely to encode a functional protein, based on available experimental and comparative sequence data; not conserved in closely related Saccharomyces species; partially overlaps the verified gene MAE1	GO:0003674,GO:0008150,GO:0016021
YLR270W	DCS1	chrXII	681186	682238	0	1637.68	-0.272818	0.135972	-2.00643	0.0448107	0.443384	0.0603617	1654.2	1581.37	1447.4	1557.44	1452.68	1818.69	1951.96	1560.99	1505.06	1885.33	Non-essential hydrolase involved in mRNA decapping; activates Xrn1p; may function in a feedback mechanism to regulate deadenylation, contains pyrophosphatase activity and a HIT (histidine triad) motif; acts as inhibitor of neutral trehalase Nth1p; required for growth on glycerol medium; protein abundance increases in response to DNA replication stress; DCS1 has a paralog, DCS2, that arose from th…	GO:0000290,GO:0000932,GO:0005634,GO:0005737,GO:0005739,GO:0016818,GO:0031086,GO:0044692,GO:0050072,GO:1901919
YLR443W	ECM7	chrXII	1022625	1023971	0	507.179	-0.291886	0.165357	-1.76519	0.0775316	0.443384	0.0604872	458.337	452.28	451.828	528.12	546.879	611.795	501.01	454.149	537.5	556.403	Putative integral membrane protein with a role in calcium uptake; non-essential protein; mutant has cell wall defects and Ca+ uptake deficiencies; transcription is induced under conditions of zinc deficiency	GO:0003674,GO:0006816,GO:0016021
YPR202W	YPR202W	chrXVI	943032	943896	0	183.207	-0.404676	0.215554	-1.87738	0.0604665	0.443384	0.0604665	171.004	163.952	151.899	193.984	171.903	226.591	203.112	162.285	182.944	214.852	Putative protein of unknown function; similar to telomere-encoded helicases; down-regulated at low calcium levels; YPR202W is not an essential gene; transcript is predicted to be spliced but there is no evidence that it is spliced in vivo	GO:0003674,GO:0005575,GO:0008150
YCL059C	KRR1	chrIII	22429	23379	1	1846.52	0.284431	0.14196	2.0036	0.0451133	0.444825	0.0607693	1831.02	2019.92	1718.3	2270.27	2037.34	1464.49	1584.28	1856.41	2153.8	1524.38	Nucleolar protein required for rRNA synthesis and ribosomal assembly; required for the synthesis of 18S rRNA and for the assembly of 40S ribosomal subunit; essential gene	GO:0000447,GO:0003674,GO:0005730,GO:0006364,GO:0030686,GO:0032040,GO:0042274
[truncated: 5,405 more rows]

## Sheet: K_vs_wt.DESeq2
hrq1-K318A compared to wild-type
[truncated: 6,261 more rows]

## Sheet: K_vs_D.DESeq2
hrq1-K318A compared to hrq1D
[truncated: 6,261 more rows]
